# Supplementary material for: Theoretical studies on the activation mechanism involving bifunctional tertiary amine–thioureas and isatylidene malononitriles
Source: Royal Society of Chemistry journal article supplement (doi:10.1039/c5ra01821h), 2015-01-01
Supplement: c5ra01821h1.pdf [file c5ra01821h1.pdf]

## Electronic Supplementary Information (ESI)

### Theoretical Study of the Activation Mechanism Involving Bifunctional Tertiary Amine–Thioureas and Isatylidene Malononitriles

Zheng-Hang Qi, Ye Zhang, Gui-Yu Ruan, Yi Zhang, Yong Wang,\* and Xing-Wang Wang\*

Key Laboratory of Organic Synthesis of Jiangsu Province, College of Chemistry, Chemical Engineering and Materials Science, Soochow University, Suzhou 215123, P. R. China.

Email: [yowang@suda.edu.cn](mailto:yowang@suda.edu.cn); [wangxw@suda.edu.cn](mailto:wangxw@suda.edu.cn)

## Contents

|                                                                                                                            |     |
|----------------------------------------------------------------------------------------------------------------------------|-----|
| 1. Computational Details.....                                                                                              | S2  |
| 2. Complete Reference 7.....                                                                                               | S3  |
| 3. B3LYP/6-31+G(d,p)–CPCM(mesitylene or dichloromethane) and B3LYP/6-311+G(d,p)–CPCM(mesitylene) optimized structures..... | S4  |
| 4. B3LYP/6-31G(d) optimized structures.....                                                                                | S7  |
| 5. Coordinates and Energies of DFT-Computed Stationary Points.....                                                         | S10 |

## 1. Computational Details

All the DFT calculations were performed with Gaussian 09 package. The geometry optimizations of all species in this study were performed using B3LYP method. The 6-31G(d) basis set was used for all atoms. Frequency calculations at the same level of theory were carried out to characterize each stationary point (minimum or transition state). In order to save computational costs, single-point energy calculations at even higher basis set level of B3LYP/6-311++G(d,p) were performed on the B3LYP/6-31G(d) optimized structures. Such a strategy is designated by the standard notation of B3LYP/6-311++G(d,p)//B3LYP/6-31G(d). In contrast, two other levels of theory are also carefully considered as M06-2X/6-311++G(d,p)-CPCM(solution)//B3LYP/6-31+G(d,p)-CPCM(solution) and M06-2X/6-311++G(d,p)-CPCM(solution)//B3LYP/6-311+G(d,p)-CPCM(solution) for comparison sake. Intrinsic reaction coordinate (IRC) was calculated to confirm the connection between the transition state and the right reactant/product. All the single point calculations were performed with B3LYP/6-311++G(d,p) and for **TSa** and **TSb**, solvent effect was considered with CPCM model and dichloromethane solvent. All the bond lengths are in angstroms (Å), and energies in kcal/mol. Optimized structures were visualized by the CYLview program.<sup>1</sup>

---

1 Legault, C. Y. *CYLview, 1.0b*, Université de Sherbrooke, 2009, <http://www.cylview.org>.

## 2. Complete Reference 7

M. J. Frisch, G. W. Trucks, H. B. Schlegel, G. E. Scuseria, M. A. Robb, J. R. Cheeseman, G. Scalmani, V. Barone, B. Mennucci, G. A. Petersson, H. Nakatsuji, M. Caricato, X. Li, H. P. Hratchian, A. F. Izmaylov, J. Bloino, G. Zheng, J. L. Sonnenberg, M. Hada, M. Ehara, K. Toyota, R. Fukuda, J. Hasegawa, M. Ishida, T. Nakajima, Y. Honda, O. Kitao, H. Nakai, T. Vreven, J. A. Montgomery, Jr., J. E. Peralta, F. Ogliaro, M. Bearpark, J. J. Heyd, E. Brothers, K. N. Kudin, V. N. Staroverov, R. Kobayashi, J. Normand, K. Raghavachari, A. Rendell, J. C. Burant, S. S. Iyengar, J. Tomasi, M. Cossi, N. Rega, J. M. Millam, M. Klene, J. E. Knox, J. B. Cross, V. Bakken, C. Adamo, J. Jaramillo, R. Gomperts, R. E. Stratmann, O. Yazyev, A. J. Austin, R. Cammi, C. Pomelli, J. W. Ochterski, R. L. Martin, K. Morokuma, V. G. Zakrzewski, G. A. Voth, P. Salvador, J. J. Dannenberg, S. Dapprich, A. D. Daniels, O. Farkas, J. B. Foresman, J. V. Ortiz, J. Cioslowski, and D. J. Fox, *Gaussian 09, Revision C.01*, Gaussian, Inc., Wallingford CT, 2010.

**3. B3LYP/6-31+G(d,p)–CPCM(mesitylene or dichloromethane) and B3LYP/6-311+G(d,p)–CPCM(mesitylene) optimized structures and selected geometric parameters of the the most important competing stationary points. All the bond lengths are in angstroms (Å) and M06-2X/6-311++G(d,p)–CPCM(mesitylene or dichloromethane) calculated single-point energies are in kcal/mol.**

|                                                                                                                                                                                                                                                                                     |                                                                                                                                                                                                                                                                                      |
|-------------------------------------------------------------------------------------------------------------------------------------------------------------------------------------------------------------------------------------------------------------------------------------|--------------------------------------------------------------------------------------------------------------------------------------------------------------------------------------------------------------------------------------------------------------------------------------|
|  <p>H C N O F P S</p>                                                                                                                                                                              |  <p>B3LYP/6-31+G(d,p)–CPCM(mesitylene) optimized<br/><b>Nu'</b></p>                                                                                                                                |
|  <p>B3LYP/6-31+G(d,p)–CPCM(mesitylene) optimized<br/><b>M1-O'</b></p> <p>M06-2X/6-311++G(d,p)–CPCM(mesitylene) calculated<br/>single-point energies: <math>\Delta E = 0.00</math> kcal/mol</p>    |  <p>B3LYP/6-31+G(d,p)–CPCM(mesitylene) optimized<br/><b>M1-N'</b></p> <p>M06-2X/6-311++G(d,p)–CPCM(mesitylene) calculated<br/>single-point energies: <math>\Delta E = 3.98</math> kcal/mol</p>    |
|  <p>B3LYP/6-311+G(d,p)–CPCM(mesitylene) optimized<br/><b>M1-O''</b></p> <p>M06-2X/6-311++G(d,p)–CPCM(mesitylene) calculated<br/>single-point energies: <math>\Delta E = 0.00</math> kcal/mol</p> |  <p>B3LYP/6-311+G(d,p)–CPCM(mesitylene) optimized<br/><b>M1-N''</b></p> <p>M06-2X/6-311++G(d,p)–CPCM(mesitylene) calculated<br/>single-point energies: <math>\Delta E = 3.54</math> kcal/mol</p> |

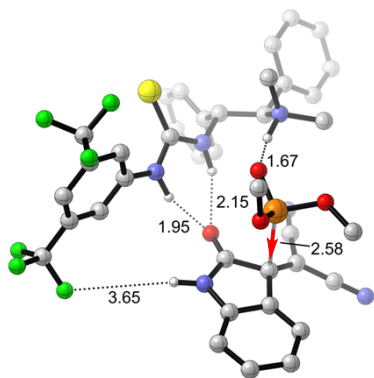

B3LYP/6-31+G(d,p)-CPCM(mesitylene) optimized

**TS<sub>P-C</sub>'**

M06-2X/6-311++G(d,p)-CPCM(mesitylene) calculated  
single-point energies:  $\Delta E = 0.00$  kcal/mol

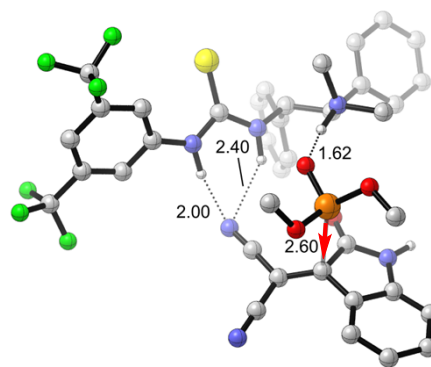

B3LYP/6-31+G(d,p)-CPCM(mesitylene) optimized

**TS<sub>Enantio</sub>'**

M06-2X/6-311++G(d,p)-CPCM(mesitylene) calculated  
single-point energies:  $\Delta E = 2.37$  kcal/mol

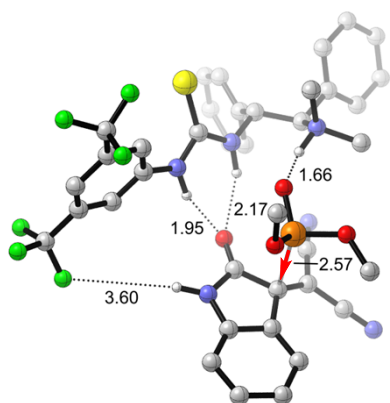

B3LYP/6-311+G(d,p)-CPCM(mesitylene) optimized

**TS<sub>P-C</sub>''**

M06-2X/6-311++G(d,p)-CPCM(mesitylene) calculated  
single-point energies:  $\Delta E = 0.00$  kcal/mol

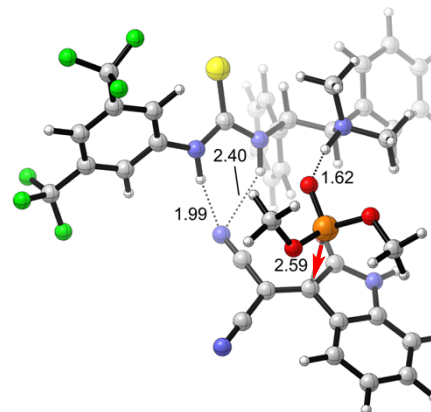

B3LYP/6-311+G(d,p)-CPCM(mesitylene) optimized

**TS<sub>Enantio</sub>''**

M06-2X/6-311++G(d,p)-CPCM(mesitylene) calculated  
single-point energies:  $\Delta E = 2.50$  kcal/mol

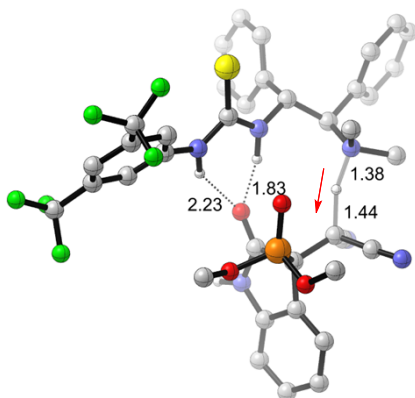

B3LYP/6-31+G(d,p)-CPCM(mesitylene) optimized

**TS<sub>NH-CH</sub>'**

M06-2X/6-311++G(d,p)-CPCM(mesitylene) calculated  
single-point energies:  $\Delta E = 0.00$  kcal/mol

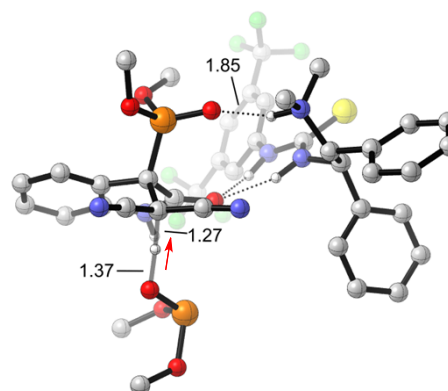

B3LYP/6-31+G(d,p)-CPCM(mesitylene) optimized

**TS<sub>OH-CH</sub>'**

M06-2X/6-311++G(d,p)-CPCM(mesitylene) calculated  
single-point energies:  $\Delta E = -12.53$  kcal/mol

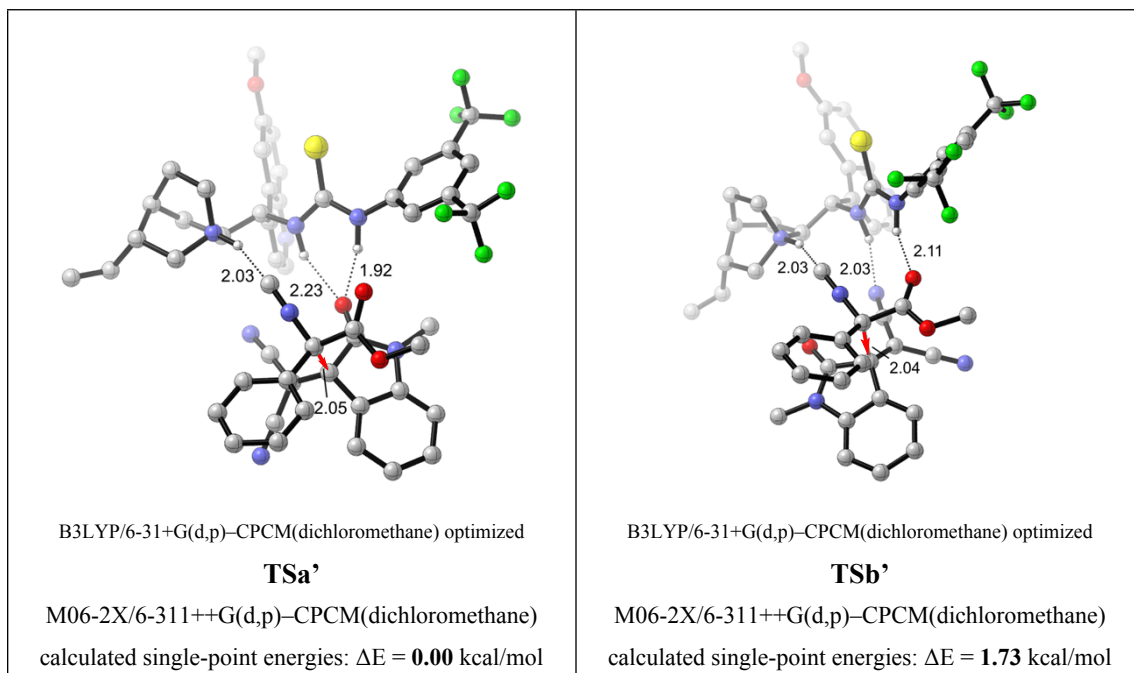

For comparison sake, the most important competing stationary points **M1-O**, **M1-N**, **TS<sub>P-C</sub>**, **TS<sub>Enantio</sub>**, **TS<sub>NH-CH</sub>**, **TS<sub>OH-CH</sub>**, **TSa** and **TSb** were re-evaluated with the M06-2X/6-311++G(d,p)-CPCM(solution)//B3LYP/6-31+G(d,p)-CPCM(solution) or M06-2X/6-311++G(d,p)-CPCM(solution)//B3LYP/6-311+G(d,p)-CPCM(solution) level of theory as shown above. Little difference was observed for the geometries of re-optimized **M1-O**, **M1-N**, **TS<sub>P-C</sub>** and **TS<sub>Enantio</sub>** when a larger basis set was applied. As a result, all these re-optimized geometries are validated at the level of B3LYP/6-31+G(d,p)-CPCM(solution). The single-point energies calculated at the level of M06-2X/6-311++G(d,p)-CPCM(solution) show the same trends of selectivity prediction as the results generated at the level of B3LYP/6-311++G(d,p)-CPCM(solution)//B3LYP/6-31G(d)- (gas phase).

4. B3LYP/6-31G(d) optimized structures and selected geometric parameters of the stationary points of all reported species. All the bond lengths are in angstroms (Å), and B3LYP/6-311++G(d,p) calculated single-point energies in kcal/mol.

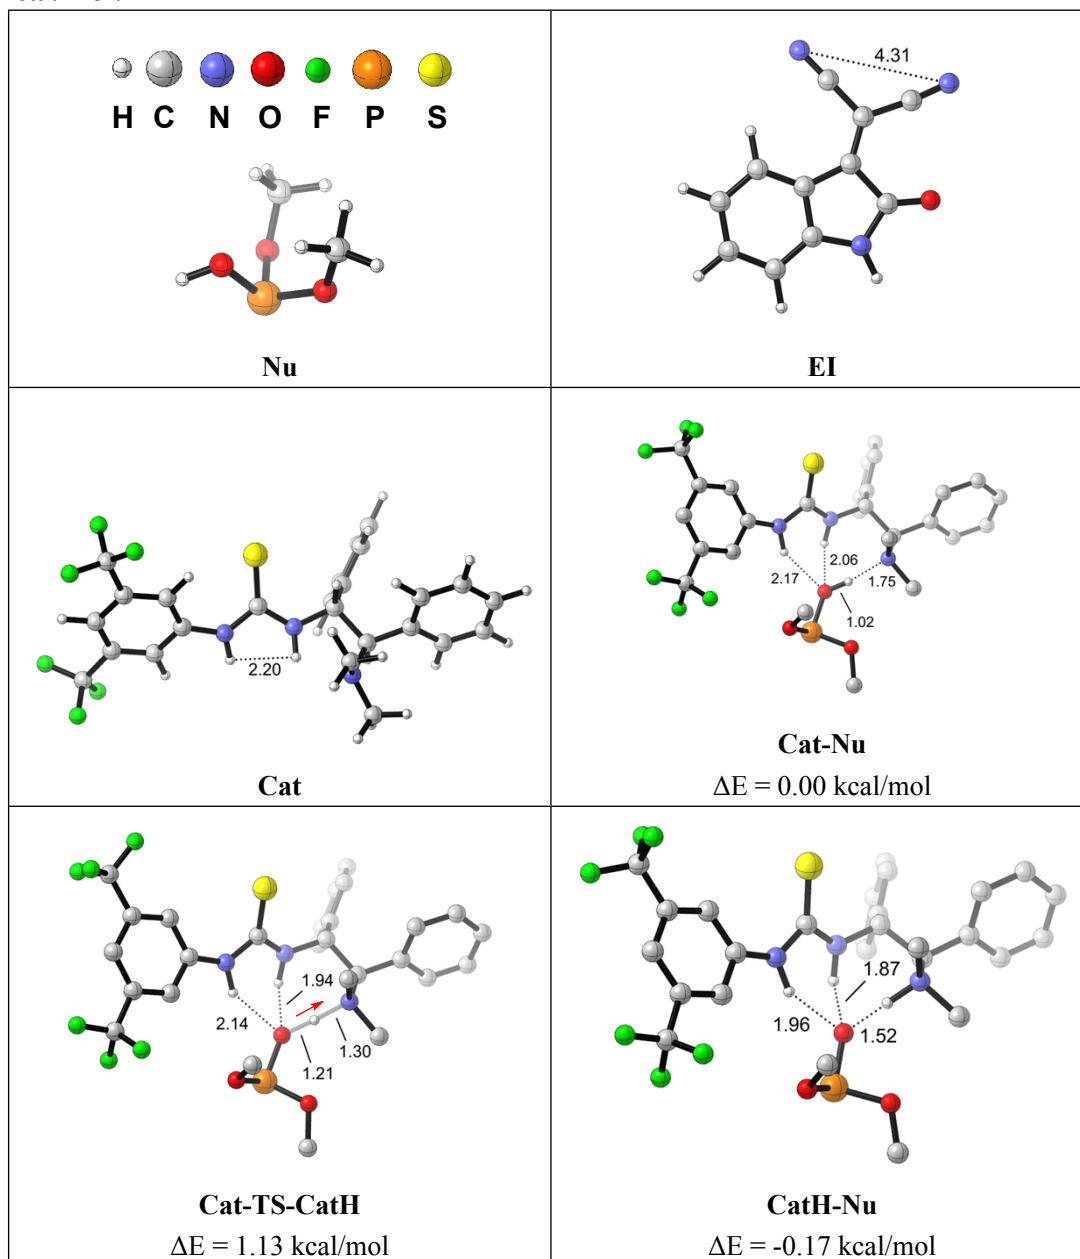

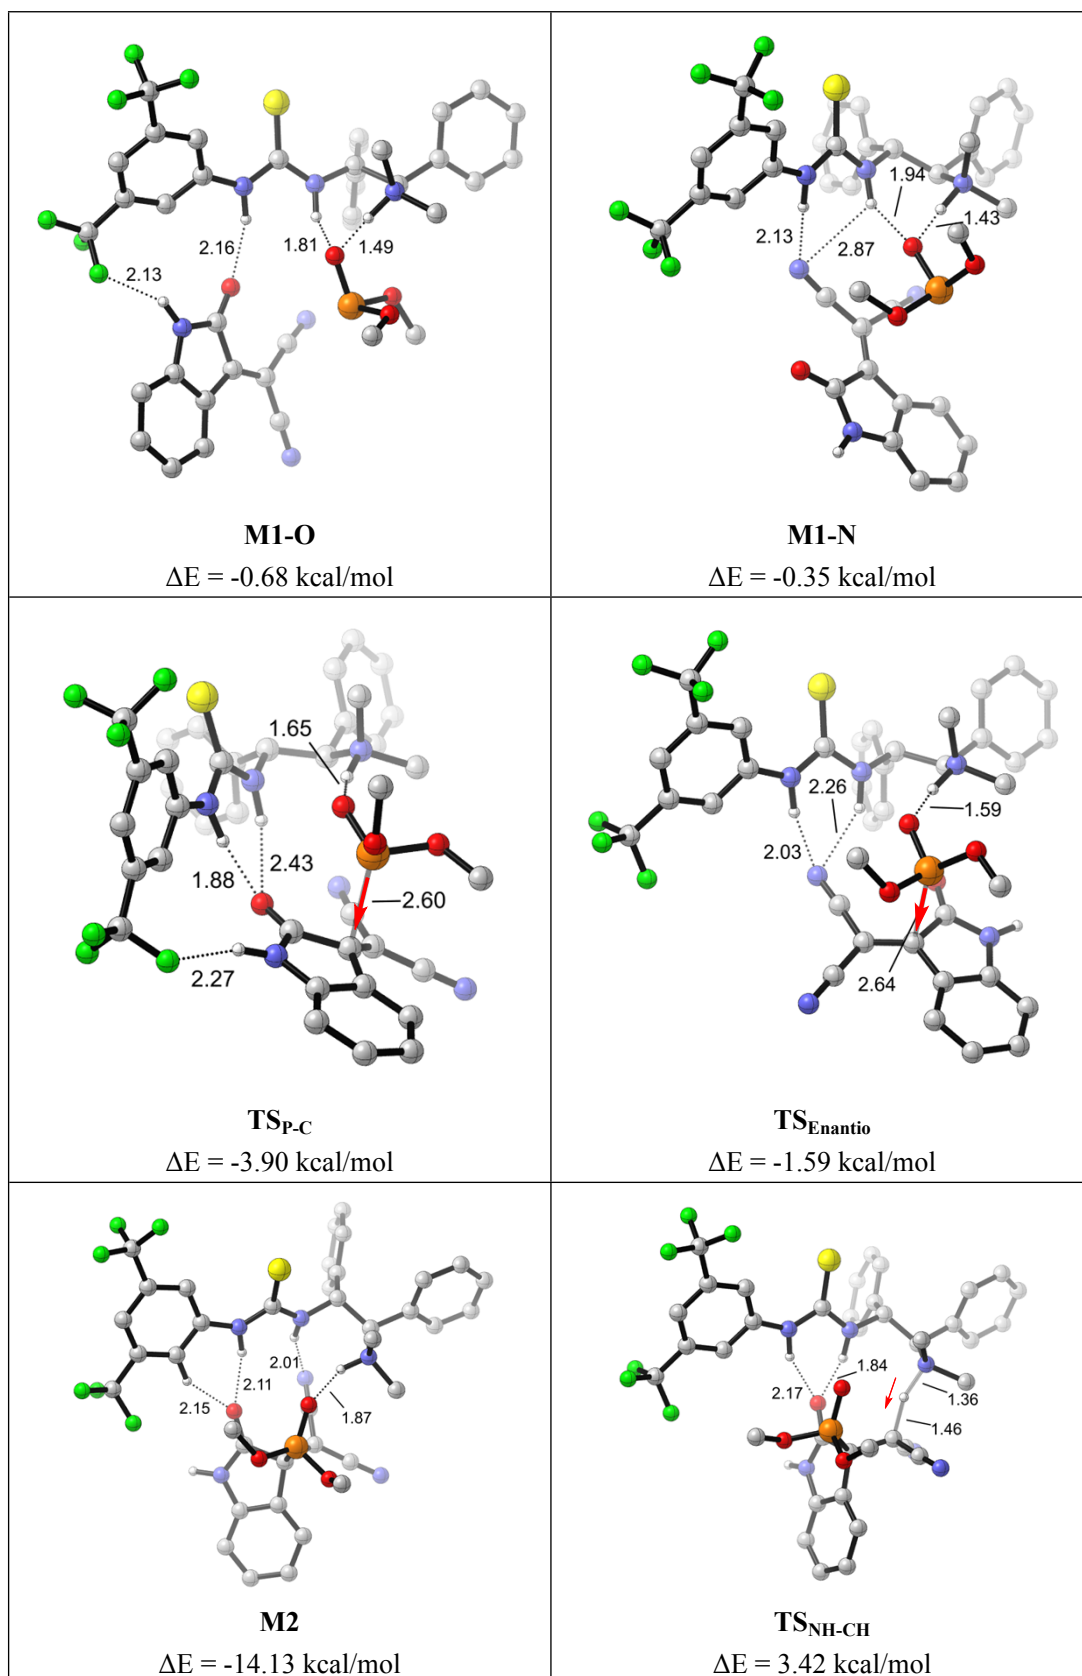



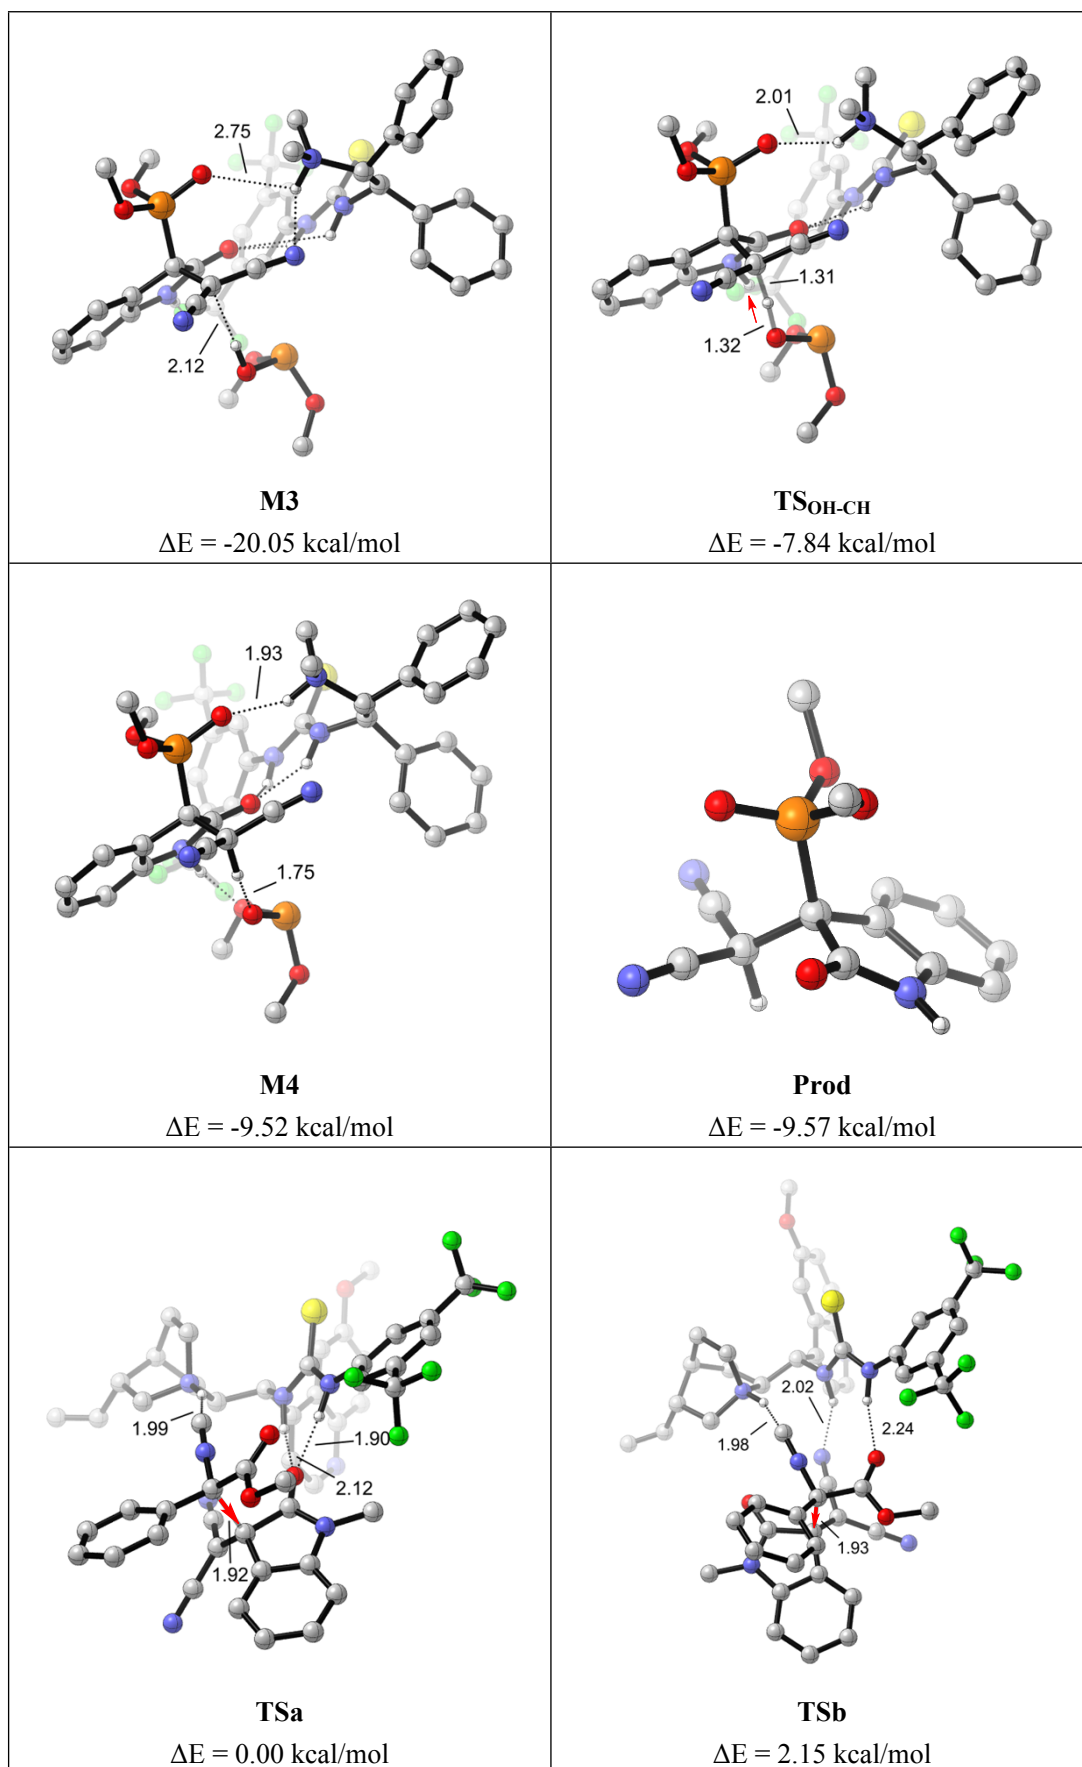

## 5. Coordinates and Energies of DFT-Computed Stationary Points

Cat

E[6-31G(d); Hartrees] = -2127.571647; G[6-31G(d); Hartrees] = -2127.641489

E[6-311++G(d,p); Hartrees] = -2128.5428226

|   |             |             |             |
|---|-------------|-------------|-------------|
| C | -7.45190200 | 1.05523400  | -1.07901800 |
| C | -7.26523500 | -0.32398600 | -0.98442000 |
| C | -5.97474800 | -0.85135700 | -0.92537400 |
| C | -4.84664100 | -0.01958000 | -0.95804000 |
| C | -5.05117800 | 1.36635100  | -1.04840600 |
| C | -6.33993300 | 1.89822800  | -1.10930600 |
| C | -3.45642700 | -0.64981800 | -0.94518400 |
| C | -2.50371800 | -0.00572500 | 0.11634800  |
| N | -2.78588000 | -0.73352000 | -2.26746200 |
| N | -1.16125500 | -0.51070000 | -0.16575100 |
| C | -2.97569700 | -0.34079000 | 1.52678700  |
| C | -2.79211800 | -1.62385800 | 2.05662100  |
| C | -3.26456200 | -1.94292100 | 3.32931500  |
| C | -3.93191600 | -0.98071200 | 4.08995300  |
| C | -4.11616300 | 0.30130600  | 3.57099000  |
| C | -3.63809100 | 0.61808900  | 2.29898300  |
| C | -2.56285400 | 0.54258300  | -2.94887300 |
| C | -0.01643600 | 0.12522600  | 0.22693800  |
| N | 1.09847900  | -0.56442600 | -0.22938500 |
| S | 0.01334300  | 1.51670500  | 1.15419700  |
| C | 2.46914400  | -0.26598400 | -0.15025000 |
| C | 3.35921500  | -1.34971600 | -0.17110000 |
| C | 4.73555200  | -1.13688300 | -0.15707500 |
| C | 5.25333000  | 0.15626100  | -0.10978800 |
| C | 4.36473100  | 1.23118000  | -0.09134900 |
| C | 2.98411600  | 1.03812600  | -0.12003300 |
| C | 4.90864000  | 2.63448500  | 0.00618000  |
| F | 4.09218200  | 3.53341300  | -0.58298100 |
| F | 6.12130000  | 2.73857500  | -0.58340800 |
| F | 5.06240300  | 3.01924100  | 1.29226300  |
| C | 5.66870400  | -2.31465200 | -0.25649000 |
| F | 5.94171000  | -2.62218200 | -1.54622200 |
| F | 6.84959000  | -2.07276000 | 0.34942100  |
| F | 5.13946900  | -3.42502800 | 0.30567600  |
| H | -8.45488600 | 1.47086500  | -1.12303100 |
| H | -8.12269500 | -0.99083100 | -0.95092800 |
| H | -5.83981800 | -1.92740000 | -0.84080800 |
| H | -4.20333400 | 2.04475700  | -1.06350600 |
| H | -6.47352700 | 2.97469300  | -1.17608700 |
| H | -2.25814600 | -2.37130200 | 1.47505000  |

|   |             |             |             |
|---|-------------|-------------|-------------|
| H | -3.10786400 | -2.94166200 | 3.72872600  |
| H | -4.29867400 | -1.22689200 | 5.08285700  |
| H | -4.62470000 | 1.06037600  | 4.15935300  |
| H | -3.77328300 | 1.62166700  | 1.90549000  |
| H | 2.97609900  | -2.36606500 | -0.18796000 |
| H | 6.32334200  | 0.32254800  | -0.09147100 |
| H | 2.31426500  | 1.88529800  | -0.11406900 |
| H | 0.90760300  | -1.52477800 | -0.49055900 |
| C | -3.41116000 | -1.70785500 | -3.15975100 |
| H | -4.42299700 | -1.41557900 | -3.48685400 |
| H | -2.78614900 | -1.82754200 | -4.05131200 |
| H | -3.48017700 | -2.67920800 | -2.65824100 |
| H | -2.03680100 | 1.23899400  | -2.28886300 |
| H | -1.92683500 | 0.36549600  | -3.82283700 |
| H | -3.49277200 | 1.02250000  | -3.29317400 |
| H | -3.58298700 | -1.69580800 | -0.64147300 |
| H | -1.14192200 | -0.99264300 | -1.06900400 |
| H | -2.49442700 | 1.08503500  | 0.01104100  |

## Nu

E[6-31G(d); Hartrees] = -647.372022; G[6-31G(d); Hartrees] = -647.405236

E[6-311++G(d,p); Hartrees] = -647.6074132

|   |             |             |             |
|---|-------------|-------------|-------------|
| P | -0.05456600 | -0.83615900 | -0.53143900 |
| O | 1.14255400  | 0.26979600  | -0.73243500 |
| O | 0.20847400  | -1.14639500 | 1.09948900  |
| O | -1.44399100 | 0.04758500  | -0.47803800 |
| H | -0.12455100 | -2.03189900 | 1.31283800  |
| C | 1.79863800  | 1.02439400  | 0.29416300  |
| H | 2.71907700  | 1.41356600  | -0.14803700 |
| H | 1.17880300  | 1.86550100  | 0.62482100  |
| H | 2.03866900  | 0.39400100  | 1.15382700  |
| C | -1.64819300 | 1.16904700  | 0.38931700  |
| H | -2.72311300 | 1.36509400  | 0.41465900  |
| H | -1.29520600 | 0.95371700  | 1.40318600  |
| H | -1.13414300 | 2.05387200  | -0.00271700 |

## EI

E[6-31G(d); Hartrees] = -661.487090; G[6-31G(d); Hartrees] = -661.525483

E[6-311++G(d,p); Hartrees] = -661.7978875

|   |             |             |             |
|---|-------------|-------------|-------------|
| C | -2.84613100 | 1.53575600  | 0.00043400  |
| C | -3.59993300 | 0.35628100  | 0.00083700  |
| C | -2.98889000 | -0.90343700 | 0.00062800  |
| C | -1.60252300 | -0.94510600 | 0.00003600  |
| C | -0.81791000 | 0.23743300  | -0.00029200 |

|   |             |             |             |
|---|-------------|-------------|-------------|
| C | -1.45200700 | 1.48658900  | -0.00009000 |
| N | -0.76375200 | -2.05966700 | -0.00023600 |
| C | 0.57381900  | -1.69914100 | -0.00073900 |
| C | 0.57210900  | -0.17615800 | -0.00050600 |
| O | 1.52659000  | -2.44926300 | -0.00132600 |
| C | 1.73020300  | 0.54872700  | -0.00033500 |
| C | 3.03907100  | -0.03503300 | -0.00007900 |
| N | 4.14404200  | -0.39862300 | 0.00306100  |
| C | 1.70947300  | 1.98046900  | -0.00065100 |
| N | 1.68115800  | 3.14402000  | -0.00098600 |
| H | -3.34888200 | 2.49745300  | 0.00055400  |
| H | -4.68469500 | 0.41434000  | 0.00131000  |
| H | -3.58129800 | -1.81318400 | 0.00120300  |
| H | -0.87245000 | 2.40253800  | -0.00027000 |
| H | -1.05920500 | -3.02543200 | -0.00051800 |

### Cat-Nu

E[6-31G(d); Hartrees] = -2774.968355; G[6-31G(d); Hartrees] = -2775.050858

E[6-311++G(d,p); Hartrees] = -2776.1705787

|   |             |             |             |
|---|-------------|-------------|-------------|
| N | 1.17499400  | -0.64923500 | 0.57460700  |
| C | 0.02562800  | -1.13736100 | 0.03506400  |
| N | -1.07787800 | -0.47488800 | 0.54001100  |
| S | -0.01363200 | -2.35657700 | -1.12668000 |
| C | -2.44640700 | -0.66755000 | 0.28024700  |
| C | -3.27123100 | 0.46303400  | 0.34516600  |
| C | -4.64274100 | 0.35001700  | 0.11941100  |
| C | -5.21934500 | -0.88534300 | -0.16212200 |
| C | -4.39581300 | -2.01261100 | -0.19826200 |
| C | -3.02318900 | -1.92093300 | 0.02552200  |
| C | -4.99337900 | -3.35364400 | -0.54022100 |
| F | -4.94424200 | -3.59345400 | -1.87016900 |
| F | -6.29359900 | -3.42944900 | -0.17538300 |
| F | -4.34150000 | -4.36717700 | 0.06818400  |
| C | -5.47243700 | 1.60502300  | 0.16336400  |
| F | -6.78133600 | 1.36504400  | -0.05280100 |
| F | -5.36471500 | 2.23367000  | 1.35423200  |
| F | -5.06816200 | 2.49572600  | -0.77977100 |
| H | -2.84272300 | 1.43672300  | 0.56790900  |
| H | -6.28380000 | -0.97236600 | -0.33815100 |
| H | -2.40653000 | -2.80764900 | 0.00007100  |
| P | -0.12898900 | 3.52327800  | 1.34909700  |
| O | 0.57032200  | 2.07430400  | 1.00778200  |
| O | 0.92424000  | 4.45321200  | 0.44031000  |
| O | -1.48893500 | 3.53118800  | 0.40576600  |

|   |             |             |             |
|---|-------------|-------------|-------------|
| C | 2.52613000  | -0.94275000 | 0.11326100  |
| H | 2.40347400  | -1.49133900 | -0.82144900 |
| C | 3.32331300  | 0.37450600  | -0.14086900 |
| H | 3.54272700  | 0.81529300  | 0.83948400  |
| C | 3.26412700  | -1.85070800 | 1.09591600  |
| C | 3.68306200  | -3.12347000 | 0.69544500  |
| C | 3.50927600  | -1.44546200 | 2.41502500  |
| C | 4.34264200  | -3.97047300 | 1.58774000  |
| H | 3.48195800  | -3.45694000 | -0.31880200 |
| C | 4.16664100  | -2.28940900 | 3.30937600  |
| H | 3.17780800  | -0.46721700 | 2.75825200  |
| C | 4.58814900  | -3.55526000 | 2.89651600  |
| H | 4.65928000  | -4.95673700 | 1.25931500  |
| H | 4.34696700  | -1.95984200 | 4.32921800  |
| H | 5.09972700  | -4.21411500 | 3.59293600  |
| C | 4.66870100  | 0.07844100  | -0.80412900 |
| C | 5.84309900  | 0.59543400  | -0.24039200 |
| C | 4.77746900  | -0.68193100 | -1.97936800 |
| C | 7.08773100  | 0.37155800  | -0.82938600 |
| H | 5.78196200  | 1.17545000  | 0.67771100  |
| C | 6.02025400  | -0.90477200 | -2.57391400 |
| H | 3.89304100  | -1.11615000 | -2.43583300 |
| C | 7.17948700  | -0.37810800 | -2.00237500 |
| H | 7.98377300  | 0.77932800  | -0.36919600 |
| H | 6.08133600  | -1.49741000 | -3.48272300 |
| H | 8.14667700  | -0.55646800 | -2.46426300 |
| N | 2.51257900  | 1.43361100  | -0.82942700 |
| C | 3.27035100  | 2.69300100  | -0.94054900 |
| H | 2.59222600  | 3.47954600  | -1.28008400 |
| H | 3.64811000  | 2.98234600  | 0.04461100  |
| H | 4.11754500  | 2.61443900  | -1.63581500 |
| H | 1.08310000  | 0.09509000  | 1.25761900  |
| H | -0.85821500 | 0.43739300  | 0.93583600  |
| C | -1.47366400 | 3.33725000  | -1.01727000 |
| H | -2.51683800 | 3.29737100  | -1.33576800 |
| H | -0.96228900 | 4.16576200  | -1.51735600 |
| H | -0.98172800 | 2.39442400  | -1.28149200 |
| C | 0.81145500  | 5.87394800  | 0.57771900  |
| H | 0.76065400  | 6.17300700  | 1.63227700  |
| H | 1.70475600  | 6.31179800  | 0.12619300  |
| H | -0.07701400 | 6.25351100  | 0.05887200  |
| H | 1.22385500  | 1.95498500  | 0.22849700  |
| C | 1.97189400  | 1.05804400  | -2.14674900 |
| H | 1.30345400  | 1.85739600  | -2.48292100 |

|   |            |            |             |
|---|------------|------------|-------------|
| H | 2.75909500 | 0.93580600 | -2.90460400 |
| H | 1.39244900 | 0.13451300 | -2.08072700 |

### Cat-TS-CatH

E[6-31G(d); Hartrees] = -2774.968163; G[6-31G(d); Hartrees] = -2775.048197

E[6-311++G(d,p); Hartrees] = -2776.1687881

|   |             |             |             |
|---|-------------|-------------|-------------|
| N | 1.16097800  | -0.70271400 | 0.58519900  |
| C | 0.01778000  | -1.17899200 | 0.01279600  |
| N | -1.07801700 | -0.46808800 | 0.45375900  |
| S | 0.00010800  | -2.42992100 | -1.11646500 |
| C | -2.45091800 | -0.65101200 | 0.21618800  |
| C | -3.26455900 | 0.48493400  | 0.32433700  |
| C | -4.63929800 | 0.38978800  | 0.10911600  |
| C | -5.23056600 | -0.83182700 | -0.19801300 |
| C | -4.41812700 | -1.96627300 | -0.26949100 |
| C | -3.04241200 | -1.89321800 | -0.06397500 |
| C | -5.06726700 | -3.30360800 | -0.51807600 |
| F | -6.06048700 | -3.20895100 | -1.43213800 |
| F | -5.62701400 | -3.79793100 | 0.61180000  |
| F | -4.19104000 | -4.22567200 | -0.96321900 |
| C | -5.45568400 | 1.65262400  | 0.18133400  |
| F | -6.77288100 | 1.42431600  | 0.00188900  |
| F | -5.30828300 | 2.27474100  | 1.37066800  |
| F | -5.07221000 | 2.54288100  | -0.77029300 |
| H | -2.82395000 | 1.44805400  | 0.56983300  |
| H | -6.29589700 | -0.90155300 | -0.37905600 |
| H | -2.43305500 | -2.78207700 | -0.13617800 |
| P | 0.00249200  | 3.35251400  | 1.34597800  |
| O | 0.67006900  | 1.97026300  | 0.86325200  |
| O | 0.98108800  | 4.39984500  | 0.44889300  |
| O | -1.42053800 | 3.44172300  | 0.47012100  |
| C | 2.51159600  | -0.97658600 | 0.11872800  |
| H | 2.40132300  | -1.52762300 | -0.81702600 |
| C | 3.28945700  | 0.35510800  | -0.12930900 |
| H | 3.49530000  | 0.80086400  | 0.85038600  |
| C | 3.28518700  | -1.86043200 | 1.09633900  |
| C | 3.84921700  | -3.06411700 | 0.66317000  |
| C | 3.43263000  | -1.48967000 | 2.43959600  |
| C | 4.55571700  | -3.87850300 | 1.54990400  |
| H | 3.72704700  | -3.37043800 | -0.37204400 |
| C | 4.13676600  | -2.30150200 | 3.32803800  |
| H | 2.98327100  | -0.56834900 | 2.80484900  |
| C | 4.70331700  | -3.49830700 | 2.88385600  |
| H | 4.98438200  | -4.81282900 | 1.19774400  |

|   |             |             |             |
|---|-------------|-------------|-------------|
| H | 4.23857800  | -2.00215200 | 4.36775900  |
| H | 5.25031100  | -4.13275300 | 3.57596300  |
| C | 4.62844600  | 0.10411400  | -0.81161700 |
| C | 5.79950700  | 0.62109600  | -0.24122900 |
| C | 4.73648000  | -0.63159200 | -2.00262000 |
| C | 7.04240000  | 0.42286200  | -0.84281300 |
| H | 5.73801600  | 1.17814400  | 0.69065800  |
| C | 5.97770600  | -0.82685400 | -2.60948500 |
| H | 3.85428000  | -1.06955100 | -2.45996600 |
| C | 7.13416900  | -0.29925700 | -2.03294500 |
| H | 7.93695200  | 0.82897000  | -0.37880600 |
| H | 6.03999200  | -1.39969200 | -3.53060800 |
| H | 8.10027800  | -0.45688000 | -2.50424100 |
| N | 2.45322300  | 1.42315100  | -0.81598400 |
| C | 3.21787900  | 2.68813400  | -0.96242900 |
| H | 2.52066500  | 3.47391100  | -1.25640200 |
| H | 3.64296900  | 2.96467700  | 0.00477300  |
| H | 4.01904400  | 2.58330600  | -1.69952600 |
| H | 1.05106400  | 0.10076800  | 1.20032300  |
| H | -0.83721900 | 0.45559000  | 0.81566900  |
| C | -1.45670500 | 3.33517600  | -0.95677400 |
| H | -2.50908200 | 3.35052400  | -1.24877900 |
| H | -0.93105600 | 4.17337700  | -1.42728100 |
| H | -1.00804800 | 2.39378900  | -1.29639600 |
| C | 0.78367100  | 5.79523200  | 0.68014700  |
| H | 0.71365400  | 6.02141300  | 1.75240500  |
| H | 1.64661100  | 6.32252800  | 0.26377200  |
| H | -0.12792800 | 6.15694000  | 0.18782300  |
| H | 1.49015600  | 1.75843400  | -0.00626600 |
| C | 1.86598800  | 1.03567000  | -2.12107400 |
| H | 1.18541000  | 1.83268400  | -2.43157900 |
| H | 2.64285900  | 0.92002400  | -2.88373100 |
| H | 1.29968900  | 0.10743200  | -2.02978100 |

### CatH-Nu

E[6-31G(d); Hartrees] = -2774.965984; G[6-31G(d); Hartrees] = -2775.047068

E[6-311++G(d,p); Hartrees] = -2776.1708601

|   |             |             |             |
|---|-------------|-------------|-------------|
| N | 1.16890100  | -0.71101400 | 0.61462300  |
| C | 0.02868600  | -1.21646600 | 0.05222600  |
| N | -1.06070400 | -0.46901100 | 0.42707100  |
| S | 0.02861700  | -2.53595300 | -1.00165500 |
| C | -2.43484000 | -0.65674800 | 0.21090700  |
| C | -3.24403300 | 0.48433400  | 0.32004000  |
| C | -4.62286300 | 0.38905300  | 0.13842400  |

|   |             |             |             |
|---|-------------|-------------|-------------|
| C | -5.22451700 | -0.83621000 | -0.13665400 |
| C | -4.41627000 | -1.97181900 | -0.21743000 |
| C | -3.03518000 | -1.89944500 | -0.04476300 |
| C | -5.05027400 | -3.29720700 | -0.55283700 |
| F | -5.16712600 | -3.46816600 | -1.89039100 |
| F | -6.29740700 | -3.39673100 | -0.03768100 |
| F | -4.33324500 | -4.33898400 | -0.08229400 |
| C | -5.44015000 | 1.65047200  | 0.23082000  |
| F | -6.76012200 | 1.41923600  | 0.07085700  |
| F | -5.27674600 | 2.26640200  | 1.42073000  |
| F | -5.07486700 | 2.54565100  | -0.72249500 |
| H | -2.79606600 | 1.44813300  | 0.55045400  |
| H | -6.29608100 | -0.90860300 | -0.27244900 |
| H | -2.43088700 | -2.79241200 | -0.10960500 |
| P | -0.00912500 | 3.29467400  | 1.32638600  |
| O | 0.54070000  | 1.90348000  | 0.79890700  |
| O | 1.01876300  | 4.31002900  | 0.41523800  |
| O | -1.44747100 | 3.52581400  | 0.47840400  |
| C | 2.51994800  | -1.00166300 | 0.16899500  |
| H | 2.42089600  | -1.64534000 | -0.70756500 |
| C | 3.26808500  | 0.31803500  | -0.20778600 |
| H | 3.47259900  | 0.85720000  | 0.72232000  |
| C | 3.32815500  | -1.75574200 | 1.22394900  |
| C | 3.93916700  | -2.97268400 | 0.90734400  |
| C | 3.46040900  | -1.24894500 | 2.52374800  |
| C | 4.67672100  | -3.66825900 | 1.86707500  |
| H | 3.82796200  | -3.38446200 | -0.09202700 |
| C | 4.19602400  | -1.94200200 | 3.48418100  |
| H | 2.97190900  | -0.31657700 | 2.79980700  |
| C | 4.80922700  | -3.15344300 | 3.15673000  |
| H | 5.14104200  | -4.61549100 | 1.60670300  |
| H | 4.28504000  | -1.53918500 | 4.48948200  |
| H | 5.38036400  | -3.69537000 | 3.90556400  |
| C | 4.58938900  | 0.06517100  | -0.91257100 |
| C | 5.75547000  | 0.67178000  | -0.42564300 |
| C | 4.68913000  | -0.76927800 | -2.03747000 |
| C | 6.98631000  | 0.46566300  | -1.04866200 |
| H | 5.70146500  | 1.30319700  | 0.45789000  |
| C | 5.91827600  | -0.97132200 | -2.66586500 |
| H | 3.81208100  | -1.28043600 | -2.42320800 |
| C | 7.06965600  | -0.35355500 | -2.17486600 |
| H | 7.87815600  | 0.94132800  | -0.65064000 |
| H | 5.97569300  | -1.62066200 | -3.53488900 |
| H | 8.02669400  | -0.51719100 | -2.66212400 |



|   |             |             |             |
|---|-------------|-------------|-------------|
| N | 2.37633800  | 1.31274600  | -0.96626100 |
| C | 3.08012300  | 2.60964900  | -1.20432700 |
| H | 2.33630600  | 3.33852000  | -1.52534600 |
| H | 3.50350100  | 2.95935700  | -0.26266000 |
| H | 3.86401600  | 2.47736600  | -1.95112900 |
| H | 1.04496600  | 0.14157800  | 1.16496700  |
| H | -0.80344100 | 0.47420400  | 0.74312300  |
| C | -1.50480900 | 3.42651800  | -0.94436100 |
| H | -2.56120500 | 3.40782600  | -1.22382300 |
| H | -1.01693900 | 4.28542800  | -1.42080500 |
| H | -1.02843300 | 2.50449600  | -1.30191100 |
| C | 0.86927800  | 5.70787000  | 0.64713800  |
| H | 0.81854000  | 5.93913600  | 1.72015500  |
| H | 1.74224500  | 6.21304500  | 0.22141100  |
| H | -0.03698400 | 6.10165900  | 0.16807400  |
| C | 1.77551800  | 0.81025400  | -2.23569400 |
| H | 1.05371300  | 1.55523300  | -2.57686900 |
| H | 2.55543000  | 0.68658900  | -2.98927400 |
| H | 1.26060800  | -0.13637400 | -2.06646400 |
| H | 1.55392600  | 1.57857200  | -0.28132100 |

### M1-O

E[6-31G(d); Hartrees] = -3436.467002; G[6-31G(d); Hartrees] = -3436.567990

E[6-311++G(d,p); Hartrees] = -3437.9793405

|   |             |             |             |
|---|-------------|-------------|-------------|
| N | -1.66909200 | 0.95315400  | 0.44801200  |
| C | -0.84433800 | 2.01768000  | 0.60302200  |
| N | 0.48212500  | 1.63968300  | 0.55311000  |
| S | -1.37339300 | 3.60576900  | 0.84485400  |
| C | 1.63623600  | 2.42105100  | 0.41351200  |
| C | 2.82815600  | 1.89465500  | 0.92952000  |
| C | 4.04233000  | 2.54842400  | 0.71695000  |
| C | 4.09329300  | 3.75938400  | 0.03185800  |
| C | 2.89794100  | 4.29796800  | -0.45016700 |
| C | 1.68111900  | 3.64101200  | -0.28183900 |
| C | 2.92126400  | 5.63388500  | -1.14889300 |
| F | 1.93673600  | 5.74039300  | -2.06679400 |
| F | 4.09569900  | 5.84051400  | -1.78839400 |
| F | 2.76414900  | 6.65409600  | -0.27742900 |
| C | 5.30007500  | 1.87413100  | 1.17939100  |
| F | 5.19864000  | 1.39270900  | 2.43330700  |
| F | 5.58070900  | 0.78173100  | 0.38328500  |
| F | 6.38006100  | 2.66882200  | 1.12273800  |
| C | 5.57400100  | -5.18418000 | -0.83990400 |
| C | 6.28467800  | -3.99956400 | -1.06733800 |

|   |             |             |             |
|---|-------------|-------------|-------------|
| C | 5.73854500  | -2.74745000 | -0.75888000 |
| C | 4.46243900  | -2.72470800 | -0.21927500 |
| C | 3.72609000  | -3.90925200 | 0.02810400  |
| C | 4.29237600  | -5.15069700 | -0.28907000 |
| N | 3.70506100  | -1.61390200 | 0.16259100  |
| C | 2.48608400  | -1.98276400 | 0.67922100  |
| C | 2.46336100  | -3.50313000 | 0.61536300  |
| O | 1.61392000  | -1.24334500 | 1.10811800  |
| C | 1.40972900  | -4.23848900 | 1.07667300  |
| C | 0.23963400  | -3.67744500 | 1.68339600  |
| N | -0.74181900 | -3.34716200 | 2.21308100  |
| C | 1.41009100  | -5.66793600 | 0.99641000  |
| N | 1.41514300  | -6.82986800 | 0.92980000  |
| H | 2.79136800  | 0.96982000  | 1.49550300  |
| H | 5.03551000  | 4.26732600  | -0.13057900 |
| H | 0.77426900  | 4.06359900  | -0.68914900 |
| H | 6.02375800  | -6.13928000 | -1.09134200 |
| H | 7.28334000  | -4.04781600 | -1.49202400 |
| H | 6.29268500  | -1.82977000 | -0.92852500 |
| H | 3.74926400  | -6.07167000 | -0.11148500 |
| H | 4.03400200  | -0.65723300 | 0.12463300  |
| P | -0.94206900 | -2.40240700 | -1.66261000 |
| O | -0.95605000 | -0.84455400 | -1.47160000 |
| O | -2.48238500 | -2.77361500 | -1.03526100 |
| O | -1.43285400 | -2.63164600 | -3.27884000 |
| C | -3.11871000 | 1.00725000  | 0.61107900  |
| H | -3.38524800 | 2.06488800  | 0.57004400  |
| C | -3.85280800 | 0.23298800  | -0.52449200 |
| H | -3.71518300 | -0.83807400 | -0.35415800 |
| C | -3.55764000 | 0.45997200  | 1.96880600  |
| C | -4.30335300 | 1.25994800  | 2.84064700  |
| C | -3.20094000 | -0.83573000 | 2.36620600  |
| C | -4.69558400 | 0.77244300  | 4.08862200  |
| H | -4.56981500 | 2.27156000  | 2.54622800  |
| C | -3.58733400 | -1.32039100 | 3.61501000  |
| H | -2.60780300 | -1.47246100 | 1.71524700  |
| C | -4.33859300 | -0.51895900 | 4.47800000  |
| H | -5.27213700 | 1.40588600  | 4.75767100  |
| H | -3.28797200 | -2.32180700 | 3.91067600  |
| H | -4.63775200 | -0.89708500 | 5.45219700  |
| C | -5.34123700 | 0.53751700  | -0.55478100 |
| C | -6.25567300 | -0.52473300 | -0.54396800 |
| C | -5.84058000 | 1.84925000  | -0.58958600 |
| C | -7.63024400 | -0.28895500 | -0.57705200 |

|   |             |             |             |
|---|-------------|-------------|-------------|
| H | -5.88457800 | -1.54545700 | -0.49940700 |
| C | -7.21494900 | 2.08693700  | -0.62925300 |
| H | -5.16128000 | 2.69659900  | -0.57100500 |
| C | -8.11376100 | 1.01897600  | -0.62439900 |
| H | -8.32130100 | -1.12721100 | -0.56134300 |
| H | -7.58213500 | 3.10921700  | -0.65478300 |
| H | -9.18379200 | 1.20589300  | -0.64899900 |
| N | -3.18407500 | 0.42078100  | -1.89194900 |
| C | -3.85564800 | -0.39076000 | -2.95033100 |
| H | -3.23165200 | -0.35614200 | -3.84473300 |
| H | -3.90593900 | -1.42403700 | -2.60888200 |
| H | -4.84959400 | 0.00928300  | -3.15583400 |
| H | -1.26677200 | 0.09637000  | 0.03811000  |
| H | 0.66743900  | 0.64414800  | 0.66865200  |
| C | -0.39662700 | -2.75024900 | -4.24195900 |
| H | -0.81498300 | -3.23213500 | -5.13185600 |
| H | 0.00230300  | -1.76719800 | -4.53099000 |
| H | 0.43961600  | -3.36395100 | -3.87490400 |
| C | -2.85042000 | -4.15019100 | -1.03083400 |
| H | -2.04717900 | -4.78245900 | -0.62820700 |
| H | -3.72895400 | -4.25811900 | -0.38781900 |
| H | -3.09435500 | -4.49771900 | -2.04227000 |
| C | -2.99279100 | 1.82455700  | -2.34633400 |
| H | -2.34020400 | 1.80412600  | -3.22234200 |
| H | -3.95622100 | 2.25971500  | -2.62125600 |
| H | -2.52320500 | 2.42063400  | -1.56294500 |
| H | -2.19382400 | -0.06823800 | -1.77553500 |

### M1-N

E[6-31G(d); Hartrees] = -3436.455545; G[6-31G(d); Hartrees] = -3436.555535

E[6-311++G(d,p); Hartrees] = -3437.9690390

|   |            |             |             |
|---|------------|-------------|-------------|
| C | 5.28192000 | -5.66181300 | -0.45577200 |
| C | 5.61105200 | -4.39834000 | 0.03601700  |
| C | 4.65597100 | -3.38141700 | 0.04607800  |
| C | 3.35841100 | -3.60950500 | -0.43294400 |
| C | 3.03451500 | -4.88847100 | -0.91193100 |
| C | 3.99064400 | -5.90441000 | -0.92717100 |
| C | 2.35823200 | -2.46591600 | -0.41481100 |
| C | 1.02677700 | -2.84043800 | 0.28693100  |
| N | 2.12092400 | -1.86490200 | -1.80240700 |
| N | 0.06240200 | -1.75006900 | 0.17883600  |
| C | 1.28323100 | -3.24121000 | 1.74095700  |
| C | 1.76086100 | -2.31319500 | 2.67505000  |
| C | 1.98482400 | -2.69085100 | 3.99831800  |

|   |             |             |             |
|---|-------------|-------------|-------------|
| C | 1.72873100  | -4.00171000 | 4.40647400  |
| C | 1.24387100  | -4.92953400 | 3.48480400  |
| C | 1.02163700  | -4.54966300 | 2.16018700  |
| C | 1.25499400  | -2.65219000 | -2.72055900 |
| C | -1.28839500 | -1.93921300 | 0.11713100  |
| N | -1.96375700 | -0.76886300 | 0.37634500  |
| S | -1.99990700 | -3.43124800 | -0.21826100 |
| C | -3.32785400 | -0.44636400 | 0.27170700  |
| C | -3.78616900 | 0.60926100  | 1.07738600  |
| C | -5.11279400 | 1.02411000  | 1.00523500  |
| C | -6.00955900 | 0.40083400  | 0.13679400  |
| C | -5.54653200 | -0.63966200 | -0.66622800 |
| C | -4.21914800 | -1.06696000 | -0.61331100 |
| C | -6.47340100 | -1.27616400 | -1.66959900 |
| F | -6.35293200 | -0.69607200 | -2.88845200 |
| F | -7.76961400 | -1.15750200 | -1.30610600 |
| F | -6.21526900 | -2.58998100 | -1.83595800 |
| C | -5.57602500 | 2.19144000  | 1.83663200  |
| F | -4.85230700 | 2.32836400  | 2.96818500  |
| F | -5.47038300 | 3.35762400  | 1.15711900  |
| F | -6.87324800 | 2.06500600  | 2.19498000  |
| C | 5.72949400  | 4.85668100  | -0.15623100 |
| C | 5.32087400  | 6.16188900  | -0.45749100 |
| C | 3.99275200  | 6.57222000  | -0.29242100 |
| C | 3.08625700  | 5.63659000  | 0.18294700  |
| C | 3.47812000  | 4.30873400  | 0.49519900  |
| C | 4.81249400  | 3.92074600  | 0.31918900  |
| N | 1.72485900  | 5.79389500  | 0.43966700  |
| C | 1.15160700  | 4.62257900  | 0.89652700  |
| C | 2.29321600  | 3.61365600  | 0.94409800  |
| O | -0.00697300 | 4.45380100  | 1.21479400  |
| C | 2.09226400  | 2.32278500  | 1.34064500  |
| C | 0.80869100  | 1.79925200  | 1.69922400  |
| N | -0.17697500 | 1.25564600  | 1.99124900  |
| C | 3.14697100  | 1.35713300  | 1.34774400  |
| N | 3.99576400  | 0.55991900  | 1.35937200  |
| H | 6.02353300  | -6.45579400 | -0.46389300 |
| H | 6.60945200  | -4.20278400 | 0.41717400  |
| H | 4.91378700  | -2.40222400 | 0.44244600  |
| H | 2.02940700  | -5.10781600 | -1.25995300 |
| H | 3.72187200  | -6.88890000 | -1.29999000 |
| H | 1.95109400  | -1.28646500 | 2.37552900  |
| H | 2.35625500  | -1.95966800 | 4.71122500  |
| H | 1.90011000  | -4.29508100 | 5.43872400  |

|   |             |             |             |
|---|-------------|-------------|-------------|
| H | 1.03042800  | -5.94862900 | 3.79587600  |
| H | 0.62947700  | -5.27105800 | 1.44883900  |
| H | -3.10349900 | 1.09515200  | 1.76747800  |
| H | -7.04621900 | 0.71162400  | 0.09610100  |
| H | -3.88559500 | -1.88369200 | -1.23682600 |
| H | 6.76634000  | 4.56983100  | -0.29834100 |
| H | 6.04874500  | 6.87688100  | -0.83051900 |
| H | 3.68590100  | 7.58557100  | -0.53184100 |
| H | 5.12885700  | 2.90849100  | 0.54330100  |
| H | 1.17892600  | 6.62392600  | 0.25839200  |
| H | -1.41696300 | -0.06839600 | 0.87681200  |
| C | 3.39803100  | -1.48832000 | -2.47472900 |
| H | 3.94211300  | -2.38038100 | -2.78900200 |
| H | 3.14707600  | -0.85900300 | -3.33080500 |
| H | 4.00391000  | -0.90752000 | -1.77704800 |
| H | 0.29774400  | -2.86801200 | -2.24413500 |
| H | 1.08160700  | -2.04637300 | -3.61206200 |
| H | 1.75502200  | -3.58047500 | -3.00635100 |
| H | 2.80925400  | -1.63000000 | 0.12856000  |
| H | 0.41002200  | -0.79447600 | 0.06438700  |
| H | 0.57662100  | -3.70076100 | -0.21405100 |
| P | 1.77101400  | 1.67429500  | -2.03148400 |
| O | 0.63113300  | 2.88114200  | -1.75850000 |
| O | 1.19956900  | 0.44000000  | -1.20088500 |
| O | 1.48684600  | 1.20802000  | -3.63687000 |
| C | -0.76606900 | 2.64013400  | -1.55133700 |
| H | -1.11138000 | 3.31910000  | -0.76677600 |
| H | -1.32384800 | 2.84448900  | -2.47322300 |
| H | -0.94888600 | 1.60881000  | -1.23686900 |
| C | 0.20143800  | 0.80492100  | -4.10315400 |
| H | 0.34221700  | 0.21234400  | -5.01442900 |
| H | -0.33013500 | 0.19792900  | -3.36008200 |
| H | -0.41428700 | 1.67748300  | -4.35339100 |
| H | 1.63940000  | -0.86430900 | -1.60400000 |

### TS<sub>P-C</sub>

E[6-31G(d); Hartrees] = -3436.461064; G[6-31G(d); Hartrees] = -3436.558031

E[6-311++G(d,p); Hartrees] = -3437.9746870

|   |            |             |             |
|---|------------|-------------|-------------|
| C | 7.96542700 | -0.61044500 | -1.11324000 |
| C | 7.47946700 | 0.49146000  | -0.40883400 |
| C | 6.11263200 | 0.61159600  | -0.15686000 |
| C | 5.20949200 | -0.36285700 | -0.60551000 |
| C | 5.71261300 | -1.47459000 | -1.29937800 |
| C | 7.07887200 | -1.59420700 | -1.55470200 |

|   |             |             |             |
|---|-------------|-------------|-------------|
| C | 3.73184100  | -0.18495100 | -0.30660300 |
| C | 3.05650900  | -1.44519000 | 0.29192400  |
| N | 2.94992400  | 0.33500600  | -1.52523000 |
| N | 1.62094200  | -1.21812300 | 0.42294500  |
| C | 3.69821700  | -1.84302300 | 1.62019300  |
| C | 3.76851700  | -0.94975100 | 2.69925300  |
| C | 4.33031900  | -1.35519300 | 3.91025100  |
| C | 4.82601000  | -2.65191700 | 4.06009300  |
| C | 4.75392900  | -3.54628600 | 2.99188300  |
| C | 4.19211100  | -3.14304700 | 1.77972500  |
| C | 2.86751900  | -0.58973300 | -2.69598400 |
| C | 0.65149000  | -2.11241200 | 0.06284800  |
| N | -0.57793500 | -1.71346200 | 0.50735100  |
| S | 0.97636500  | -3.52601300 | -0.80503100 |
| C | -1.86975500 | -2.22177900 | 0.32416000  |
| C | -2.83998900 | -1.69997400 | 1.19445200  |
| C | -4.18386600 | -2.02849000 | 1.04693500  |
| C | -4.59278000 | -2.92550900 | 0.06235700  |
| C | -3.62029300 | -3.47617300 | -0.77419400 |
| C | -2.27238100 | -3.13082000 | -0.66645700 |
| C | -4.02619400 | -4.49572300 | -1.80921500 |
| F | -3.27449500 | -4.40395000 | -2.92678400 |
| F | -5.31938300 | -4.34834300 | -2.17630700 |
| F | -3.88993800 | -5.75696000 | -1.34292400 |
| C | -5.17197900 | -1.35463800 | 1.95582300  |
| F | -4.89558800 | -1.56791800 | 3.25798500  |
| F | -5.13506600 | 0.00794000  | 1.78443100  |
| F | -6.43895200 | -1.73926700 | 1.73235900  |
| C | -3.54904100 | 5.84970400  | 0.20680000  |
| C | -4.62007600 | 4.98044900  | 0.43872200  |
| C | -4.40305100 | 3.64422300  | 0.79063500  |
| C | -3.08687500 | 3.21787200  | 0.89418700  |
| C | -1.98968700 | 4.07044500  | 0.64630600  |
| C | -2.22773600 | 5.40416100  | 0.30727700  |
| N | -2.61387100 | 1.95553800  | 1.25913300  |
| C | -1.24101700 | 1.90483100  | 1.28369500  |
| C | -0.76604700 | 3.27227900  | 0.84047600  |
| O | -0.56284800 | 0.94280000  | 1.65063500  |
| C | 0.52152400  | 3.74805500  | 1.13030300  |
| C | 1.59989100  | 2.88394300  | 1.44954900  |
| N | 2.54125700  | 2.22830000  | 1.67112200  |
| C | 0.87956400  | 5.10366100  | 0.90034100  |
| N | 1.16913800  | 6.21522600  | 0.69011200  |
| H | 9.02960100  | -0.70791500 | -1.30921800 |

|   |             |             |             |
|---|-------------|-------------|-------------|
| H | 8.16258200  | 1.25561600  | -0.04888800 |
| H | 5.74150700  | 1.46414300  | 0.40632200  |
| H | 5.04472600  | -2.26281500 | -1.63384000 |
| H | 7.45058700  | -2.46233300 | -2.09183200 |
| H | 3.38581200  | 0.06376400  | 2.60677800  |
| H | 4.37927100  | -0.65347000 | 4.73859400  |
| H | 5.26260800  | -2.96362300 | 5.00522400  |
| H | 5.13069800  | -4.55979300 | 3.10034800  |
| H | 4.12456500  | -3.84679500 | 0.95446000  |
| H | -2.52686000 | -1.02852800 | 1.98851900  |
| H | -5.63743300 | -3.18296000 | -0.05605600 |
| H | -1.54138300 | -3.54795300 | -1.34406100 |
| H | -3.74314200 | 6.88551800  | -0.05444600 |
| H | -5.63912700 | 5.34670500  | 0.35216500  |
| H | -5.22838800 | 2.96554300  | 0.98374700  |
| H | -1.40669400 | 6.08853000  | 0.12966300  |
| H | -3.20676500 | 1.15785400  | 1.44806300  |
| H | -0.58666100 | -0.81876500 | 1.00431200  |
| C | 3.42781700  | 1.68885700  | -1.94811900 |
| H | 4.41622900  | 1.60286900  | -2.40060100 |
| H | 2.69924400  | 2.09771700  | -2.64873200 |
| H | 3.46814700  | 2.33165600  | -1.06785400 |
| H | 2.46155700  | -1.55114100 | -2.37627600 |
| H | 2.17965900  | -0.13791000 | -3.41175800 |
| H | 3.85680100  | -0.71002800 | -3.13884900 |
| H | 3.61750100  | 0.63105400  | 0.41074300  |
| H | 1.33286600  | -0.40728600 | 0.96619200  |
| H | 3.15363600  | -2.28847200 | -0.39311300 |
| P | -0.51082500 | 2.13145500  | -1.48153300 |
| O | -1.81409100 | 1.93556000  | -2.47738300 |
| O | 0.33712800  | 0.86121400  | -1.44644700 |
| O | 0.44844600  | 3.21060800  | -2.32561700 |
| H | 1.93617600  | 0.48805400  | -1.24874500 |
| C | -1.68506600 | 1.14025200  | -3.67000200 |
| H | -1.30510100 | 0.14332700  | -3.42942900 |
| H | -2.68430100 | 1.06348800  | -4.10440000 |
| H | -1.01149700 | 1.62407200  | -4.38698200 |
| C | -0.06084600 | 4.50326300  | -2.68289700 |
| H | -1.14608900 | 4.48131100  | -2.82696200 |
| H | 0.19780400  | 5.24215800  | -1.91752100 |
| H | 0.41545900  | 4.78836800  | -3.62560300 |

**TS<sub>Enantio</sub>**

E[6-31G(d); Hartrees] = -3436.454852; G[6-31G(d); Hartrees] = -3436.553954

E[6-311++G(d,p); Hartrees] = -3437.9710113

|   |             |             |             |
|---|-------------|-------------|-------------|
| C | -5.01700800 | 5.72409600  | -1.00020200 |
| C | -5.44245500 | 4.57932700  | -0.32562500 |
| C | -4.55860600 | 3.51882500  | -0.12536500 |
| C | -3.23849200 | 3.58149600  | -0.59244900 |
| C | -2.81790800 | 4.74537500  | -1.25576300 |
| C | -3.70232900 | 5.80448600  | -1.46243900 |
| C | -2.31089700 | 2.40276300  | -0.35004900 |
| C | -0.97602500 | 2.82164200  | 0.32432800  |
| N | -2.07935200 | 1.57104100  | -1.61593200 |
| N | -0.01061200 | 1.72813300  | 0.30845000  |
| C | -1.23912800 | 3.33277200  | 1.73980300  |
| C | -1.77616700 | 2.49205600  | 2.72580100  |
| C | -1.98376500 | 2.96960200  | 4.01969700  |
| C | -1.66057200 | 4.28881800  | 4.34468700  |
| C | -1.12291200 | 5.12867500  | 3.36923400  |
| C | -0.91239100 | 4.65153800  | 2.07459400  |
| C | -1.27037300 | 2.20086400  | -2.70269500 |
| C | 1.31148500  | 1.87825100  | -0.01784000 |
| N | 2.06309500  | 0.82214800  | 0.41768300  |
| S | 1.90429100  | 3.22457200  | -0.85357700 |
| C | 3.41286000  | 0.48950800  | 0.20218700  |
| C | 4.00762300  | -0.34733300 | 1.15960000  |
| C | 5.32561300  | -0.76872600 | 1.00568800  |
| C | 6.07669800  | -0.36830800 | -0.09903700 |
| C | 5.47749300  | 0.45446800  | -1.05192300 |
| C | 4.15726200  | 0.88375700  | -0.91796900 |
| C | 6.25116000  | 0.82085700  | -2.29241500 |
| F | 6.15985800  | -0.14794900 | -3.23530500 |
| F | 7.56721800  | 0.98426000  | -2.02929400 |
| F | 5.80329300  | 1.96131100  | -2.85554400 |
| C | 5.97269900  | -1.60689300 | 2.07734200  |
| F | 6.64334900  | -0.84051800 | 2.96847500  |
| F | 5.06680100  | -2.32383800 | 2.77514200  |
| F | 6.86821900  | -2.47484200 | 1.55644900  |
| C | -4.06035800 | -6.24417900 | 0.23291200  |
| C | -5.33991300 | -5.71724200 | 0.03428700  |
| C | -5.58019100 | -4.34100000 | 0.13368300  |
| C | -4.50178100 | -3.52319700 | 0.43882600  |
| C | -3.19972400 | -4.03471900 | 0.63750700  |
| C | -2.97974400 | -5.40900700 | 0.53323200  |
| N | -4.47189700 | -2.13521600 | 0.59489000  |
| C | -3.20633000 | -1.66760600 | 0.89679600  |
| C | -2.32120100 | -2.89389300 | 0.93150800  |



|   |             |             |             |
|---|-------------|-------------|-------------|
| O | -2.92287500 | -0.49655700 | 1.12515200  |
| C | -1.10090700 | -2.91906300 | 1.60809900  |
| C | -0.39528300 | -1.73765100 | 1.95040800  |
| N | 0.25560100  | -0.80869800 | 2.22811200  |
| C | -0.39964200 | -4.13329000 | 1.85269400  |
| N | 0.17156400  | -5.12741600 | 2.06558300  |
| H | -5.70202900 | 6.55263800  | -1.15686300 |
| H | -6.45954700 | 4.51262600  | 0.05049800  |
| H | -4.89093700 | 2.63468500  | 0.41309600  |
| H | -1.79402200 | 4.83986400  | -1.60543300 |
| H | -3.35891200 | 6.69717000  | -1.97763900 |
| H | -2.02326700 | 1.45850100  | 2.49543000  |
| H | -2.39414700 | 2.30651500  | 4.77650900  |
| H | -1.82166900 | 4.65732100  | 5.35423900  |
| H | -0.86069000 | 6.15432100  | 3.61450700  |
| H | -0.48185300 | 5.30550600  | 1.32102200  |
| H | 3.43577200  | -0.66918400 | 2.02424400  |
| H | 7.10400400  | -0.69258600 | -0.21542200 |
| H | 3.71424100  | 1.52507100  | -1.66536900 |
| H | -3.89995800 | -7.31475400 | 0.15133400  |
| H | -6.16649100 | -6.38282300 | -0.19806800 |
| H | -6.57581700 | -3.93293000 | -0.01511900 |
| H | -1.98929300 | -5.82402300 | 0.67654200  |
| H | -5.26803100 | -1.51815300 | 0.52633600  |
| H | 1.58821900  | 0.20129300  | 1.07624100  |
| C | -3.36424900 | 1.04029900  | -2.16295000 |
| H | -3.95187000 | 1.85472400  | -2.58794400 |
| H | -3.12561600 | 0.28876200  | -2.91678000 |
| H | -3.91344700 | 0.56680200  | -1.34799700 |
| H | -0.33135500 | 2.58275600  | -2.29762100 |
| H | -1.05222300 | 1.41698400  | -3.43022200 |
| H | -1.84353200 | 3.00205100  | -3.17193100 |
| H | -2.81431300 | 1.68839100  | 0.30560400  |
| H | -0.26419700 | 0.89146200  | 0.83000600  |
| H | -0.50946800 | 3.62415100  | -0.24790300 |
| P | -1.57375700 | -2.13818500 | -1.48954800 |
| O | -0.42137100 | -3.31013300 | -1.59949700 |
| O | -0.89503800 | -0.76700300 | -1.39180900 |
| O | -2.25249600 | -2.14333900 | -3.03233800 |
| H | -1.54106800 | 0.68469400  | -1.34253800 |
| C | 0.84523000  | -3.02502900 | -2.22097000 |
| H | 1.48652300  | -3.88778500 | -2.02900700 |
| H | 0.72353700  | -2.89006100 | -3.30180300 |
| H | 1.29139900  | -2.12309900 | -1.79397800 |

|   |             |             |             |
|---|-------------|-------------|-------------|
| C | -2.82377300 | -3.36350600 | -3.51229400 |
| H | -3.23006500 | -3.15719500 | -4.50608800 |
| H | -2.06631300 | -4.15137300 | -3.58617100 |
| H | -3.63508700 | -3.71520500 | -2.86173000 |

## M2

E[6-31G(d); Hartrees] = -3436.477240; G[6-31G(d); Hartrees] = -3436.574199

E[6-311++G(d,p); Hartrees] = -3437.9909863

|   |             |             |             |
|---|-------------|-------------|-------------|
| C | 7.75901300  | -1.33970700 | -0.99264200 |
| C | 7.38078000  | -0.34180200 | -0.09415500 |
| C | 6.02927300  | -0.10621500 | 0.15878700  |
| C | 5.03467400  | -0.85965100 | -0.48084100 |
| C | 5.42869300  | -1.87124100 | -1.37102400 |
| C | 6.77962600  | -2.10518500 | -1.62791700 |
| C | 3.57889900  | -0.56491100 | -0.17298500 |
| C | 2.71969500  | -1.82121400 | 0.12581700  |
| N | 2.91940200  | 0.28641800  | -1.28127400 |
| N | 1.32931700  | -1.41518100 | 0.32524100  |
| C | 3.28067000  | -2.60907700 | 1.30919600  |
| C | 3.34179300  | -2.05811400 | 2.59750700  |
| C | 3.85298700  | -2.80942200 | 3.65632600  |
| C | 4.30523000  | -4.11354000 | 3.44571800  |
| C | 4.23809700  | -4.66935200 | 2.16792500  |
| C | 3.72698700  | -3.92049600 | 1.10717700  |
| C | 2.74783200  | -0.39332800 | -2.60479400 |
| C | 0.25664900  | -2.08969100 | -0.18524500 |
| N | -0.93312800 | -1.60969800 | 0.30577000  |
| S | 0.41692800  | -3.32048600 | -1.33564300 |
| C | -2.25620400 | -2.06358400 | 0.13948000  |
| C | -3.27005400 | -1.15220800 | 0.47731900  |
| C | -4.61060200 | -1.50187400 | 0.34701500  |
| C | -4.98158000 | -2.76982600 | -0.09822300 |
| C | -3.97204600 | -3.68261800 | -0.40035300 |
| C | -2.62119200 | -3.34982600 | -0.28621000 |
| C | -4.34053200 | -5.08721900 | -0.80627200 |
| F | -3.45637500 | -5.61023500 | -1.68062800 |
| F | -5.56230500 | -5.13718400 | -1.38419100 |
| F | -4.37718300 | -5.91756000 | 0.26193400  |
| C | -5.65601300 | -0.49121000 | 0.73156300  |
| F | -5.28092400 | 0.77145600  | 0.38745100  |
| F | -6.84176200 | -0.73125300 | 0.13588400  |
| F | -5.87740300 | -0.46983400 | 2.06522700  |
| C | -0.95335500 | 7.13160900  | 0.51607800  |
| C | -2.13482500 | 7.08634400  | 1.25843700  |

|   |             |             |             |
|---|-------------|-------------|-------------|
| C | -2.66568500 | 5.86635500  | 1.69357400  |
| C | -1.97381100 | 4.71316600  | 1.35141700  |
| C | -0.78922600 | 4.73657000  | 0.60029900  |
| C | -0.27000600 | 5.95489400  | 0.18072800  |
| N | -2.28613700 | 3.38169300  | 1.67272500  |
| C | -1.38084200 | 2.49323100  | 1.17321800  |
| C | -0.27753000 | 3.31029400  | 0.44758700  |
| O | -1.45763700 | 1.27290800  | 1.26388500  |
| C | 1.09451900  | 3.05769400  | 1.07220900  |
| C | 1.37764400  | 1.85970100  | 1.71755000  |
| N | 1.62280500  | 0.83608900  | 2.24933200  |
| C | 2.16560400  | 3.92551000  | 0.80206800  |
| N | 3.07787800  | 4.61998400  | 0.54931300  |
| H | 8.81073400  | -1.52696600 | -1.19029300 |
| H | 8.13474800  | 0.25163000  | 0.41496200  |
| H | 5.74335200  | 0.66631900  | 0.86819700  |
| H | 4.68590500  | -2.49636900 | -1.85759300 |
| H | 7.06583900  | -2.89389400 | -2.31801400 |
| H | 2.96897400  | -1.05408500 | 2.78198700  |
| H | 3.89217000  | -2.37288300 | 4.65077500  |
| H | 4.70083700  | -4.69513700 | 4.27419700  |
| H | 4.57694300  | -5.68731900 | 1.99498400  |
| H | 3.66446700  | -4.36259800 | 0.11640700  |
| H | -2.99918900 | -0.16638400 | 0.83732700  |
| H | -6.02454000 | -3.03677700 | -0.21417700 |
| H | -1.86268200 | -4.07356200 | -0.54408400 |
| H | -0.55494100 | 8.08937200  | 0.19500300  |
| H | -2.65157400 | 8.00852800  | 1.50890700  |
| H | -3.58028700 | 5.82639900  | 2.27798000  |
| H | 0.65080100  | 5.99340900  | -0.38880900 |
| H | -3.10453600 | 3.07423800  | 2.18163100  |
| H | -0.87843000 | -0.69835800 | 0.76250400  |
| C | 3.60480000  | 1.60832200  | -1.45414600 |
| H | 4.59834700  | 1.44404600  | -1.87083500 |
| H | 2.99685500  | 2.21329000  | -2.12576700 |
| H | 3.67375200  | 2.11852400  | -0.49365200 |
| H | 2.18538500  | -1.31911000 | -2.47324900 |
| H | 2.17253400  | 0.28175300  | -3.23805500 |
| H | 3.72908900  | -0.58653800 | -3.03826200 |
| H | 3.52310800  | 0.09454000  | 0.69658800  |
| H | 1.18973900  | -0.75731500 | 1.10157700  |
| H | 2.71394000  | -2.48582200 | -0.73892300 |
| P | -0.29339400 | 2.70011700  | -1.31619400 |
| O | -1.82160000 | 2.72480900  | -1.84089400 |

|   |             |            |             |
|---|-------------|------------|-------------|
| O | 0.38347100  | 1.37760300 | -1.53673800 |
| O | 0.37353700  | 3.93912600 | -2.10004100 |
| H | 1.94974800  | 0.51240400 | -0.97749100 |
| C | -2.58028000 | 1.52606100 | -2.12016500 |
| H | -3.03959500 | 1.65764500 | -3.10272800 |
| H | -1.93152400 | 0.64825100 | -2.12448100 |
| H | -3.35782100 | 1.41775100 | -1.36107600 |
| C | 0.32336200  | 4.01061700 | -3.53599300 |
| H | 0.92502000  | 4.87511300 | -3.81929200 |
| H | 0.74375900  | 3.10567700 | -3.98724600 |
| H | -0.70868400 | 4.14670600 | -3.87051700 |

### TS<sub>NH-CH</sub>

E[6-31G(d); Hartrees] = -3436.459170; G[6-31G(d); Hartrees] = -3436.554922

E[6-311++G(d,p); Hartrees] = -3437.9630304

|   |             |             |             |
|---|-------------|-------------|-------------|
| C | 7.08282800  | -3.26743600 | -0.72924600 |
| C | 6.96453400  | -2.22747900 | 0.19308100  |
| C | 5.75311000  | -1.54894000 | 0.33064700  |
| C | 4.63962400  | -1.89965500 | -0.44382900 |
| C | 4.76768400  | -2.95362600 | -1.36209400 |
| C | 5.98060700  | -3.62778200 | -1.50669800 |
| C | 3.33499000  | -1.12747400 | -0.26606000 |
| C | 2.19029900  | -2.11730700 | 0.09339500  |
| N | 3.02422100  | -0.18142000 | -1.43061600 |
| N | 0.89606300  | -1.45571700 | 0.13561400  |
| C | 2.50536000  | -2.80922200 | 1.42308200  |
| C | 2.51118500  | -2.08294700 | 2.62217800  |
| C | 2.79036700  | -2.71640200 | 3.83269600  |
| C | 3.06191100  | -4.08609700 | 3.86171500  |
| C | 3.04697400  | -4.81754400 | 2.67408500  |
| C | 2.76903600  | -4.18183700 | 1.46288500  |
| C | 2.24634400  | -0.76619800 | -2.55293600 |
| C | -0.28863200 | -2.08355000 | -0.10807800 |
| N | -1.34917400 | -1.32029900 | 0.33021200  |
| S | -0.39433300 | -3.59726900 | -0.83996000 |
| C | -2.73628800 | -1.44371600 | 0.20118100  |
| C | -3.50165900 | -0.51305300 | 0.92810300  |
| C | -4.89092700 | -0.52084200 | 0.85651800  |
| C | -5.55925000 | -1.45852900 | 0.06800900  |
| C | -4.79879900 | -2.37896300 | -0.65043100 |
| C | -3.40399400 | -2.38379100 | -0.59903200 |
| C | -5.49192900 | -3.43209200 | -1.47857700 |
| F | -4.81852200 | -3.70014500 | -2.61707300 |
| F | -6.74294500 | -3.05305800 | -1.82691700 |

|   |             |             |             |
|---|-------------|-------------|-------------|
| F | -5.60651100 | -4.59744400 | -0.80318400 |
| C | -5.67701000 | 0.45950300  | 1.68395600  |
| F | -5.02508300 | 1.64761800  | 1.81233600  |
| F | -6.88449100 | 0.72481000  | 1.14429200  |
| F | -5.89268200 | 0.00713400  | 2.93831900  |
| C | 0.87732300  | 6.69577300  | 0.28915600  |
| C | 0.56861600  | 6.77637700  | 1.64795400  |
| C | 0.35381800  | 5.61957900  | 2.40573700  |
| C | 0.46254200  | 4.40218300  | 1.75052400  |
| C | 0.77255000  | 4.29594200  | 0.38730700  |
| C | 0.97815100  | 5.45467600  | -0.35357400 |
| N | 0.30101200  | 3.11170700  | 2.28211600  |
| C | 0.48849800  | 2.13193700  | 1.36345300  |
| C | 0.83121200  | 2.81691600  | 0.00834500  |
| O | 0.39580300  | 0.92746200  | 1.59846800  |
| C | 2.23110300  | 2.32691600  | -0.51918600 |
| C | 3.24683900  | 2.42696600  | 0.51269600  |
| N | 4.05248300  | 2.39608500  | 1.35441800  |
| C | 2.60679200  | 3.05506000  | -1.71476400 |
| N | 2.87160600  | 3.57737800  | -2.72274000 |
| H | 8.02503800  | -3.79723300 | -0.83921300 |
| H | 7.81371300  | -1.94228000 | 0.80792100  |
| H | 5.66869100  | -0.73819400 | 1.05021500  |
| H | 3.91963800  | -3.26311600 | -1.96649100 |
| H | 6.06097200  | -4.44038100 | -2.22363900 |
| H | 2.27881900  | -1.02014700 | 2.61878500  |
| H | 2.79221500  | -2.14030500 | 4.75431900  |
| H | 3.27698700  | -4.58003200 | 4.80553800  |
| H | 3.24569300  | -5.88584000 | 2.68788800  |
| H | 2.74818100  | -4.75720800 | 0.54196100  |
| H | -3.00017600 | 0.22887800  | 1.54254100  |
| H | -6.63999700 | -1.46082600 | 0.00420600  |
| H | -2.83472300 | -3.10029500 | -1.17343700 |
| H | 1.04073000  | 7.60485600  | -0.28146400 |
| H | 0.49367000  | 7.74727800  | 2.12901200  |
| H | 0.11451100  | 5.67492400  | 3.46355300  |
| H | 1.21405700  | 5.40470500  | -1.40933000 |
| H | 0.07916600  | 2.89510200  | 3.24496800  |
| H | -1.06998200 | -0.46523000 | 0.80295700  |
| C | 4.27994300  | 0.41170600  | -1.97506200 |
| H | 4.90067100  | -0.35284300 | -2.44729400 |
| H | 4.01119200  | 1.16756000  | -2.71281100 |
| H | 4.84637700  | 0.88102900  | -1.16826600 |
| H | 1.31373900  | -1.18780600 | -2.18921100 |

|   |             |             |             |
|---|-------------|-------------|-------------|
| H | 2.00768300  | 0.04101900  | -3.24825100 |
| H | 2.83582300  | -1.52619200 | -3.07817700 |
| H | 3.47603500  | -0.44639100 | 0.57934300  |
| H | 0.85647600  | -0.54359500 | 0.58832600  |
| H | 2.11593500  | -2.88402900 | -0.67982000 |
| P | -0.49730400 | 2.33528200  | -1.21087900 |
| O | -1.78543000 | 2.63903400  | -0.29234100 |
| O | -0.35651000 | 0.96196900  | -1.76263600 |
| O | -0.55488900 | 3.50449100  | -2.31656600 |
| H | 2.41781200  | 0.93964700  | -0.95141100 |
| C | -3.10035800 | 2.69850800  | -0.89210500 |
| H | -3.20076900 | 3.62511000  | -1.46300300 |
| H | -3.26901000 | 1.83240700  | -1.53828800 |
| H | -3.81095100 | 2.67807600  | -0.06718400 |
| C | -0.32258600 | 3.25552000  | -3.72446800 |
| H | 0.67476700  | 3.61706100  | -3.98028800 |
| H | -0.40670500 | 2.18924800  | -3.94402700 |
| H | -1.08540000 | 3.81564400  | -4.26913700 |

### M3

E[6-31G(d); Hartrees] = -4083.862481; G[6-31G(d); Hartrees] = -4083.973433

E[6-311++G(d,p); Hartrees] = -4085.6078337

|   |             |             |             |
|---|-------------|-------------|-------------|
| C | -8.33893700 | -0.72012300 | -1.31868800 |
| C | -7.82137800 | -1.66407000 | -0.43124000 |
| C | -6.47357000 | -1.62027100 | -0.07447500 |
| C | -5.62184500 | -0.63542400 | -0.59436900 |
| C | -6.15744800 | 0.31713800  | -1.47620200 |
| C | -7.50386000 | 0.27039400  | -1.83860200 |
| C | -4.16425800 | -0.62441600 | -0.17423000 |
| C | -3.69785900 | 0.76795400  | 0.35068600  |
| N | -3.23175100 | -1.17182700 | -1.26616200 |
| N | -2.24432700 | 0.91798400  | 0.31012700  |
| C | -4.26952100 | 1.00179400  | 1.74756600  |
| C | -3.86445400 | 0.21096600  | 2.83303300  |
| C | -4.38182600 | 0.44575300  | 4.10652500  |
| C | -5.31052700 | 1.46908900  | 4.31027100  |
| C | -5.71542500 | 2.26028400  | 3.23513200  |
| C | -5.19559300 | 2.02836600  | 1.96048100  |
| C | -3.04894300 | -0.32574900 | -2.48680300 |
| C | -1.61772100 | 2.07086400  | -0.09931000 |
| N | -0.27490200 | 2.03495500  | 0.15036900  |
| S | -2.45021500 | 3.33713600  | -0.84935500 |
| C | 0.78449300  | 2.90885200  | -0.16460900 |
| C | 2.01346400  | 2.59861300  | 0.44194300  |

|   |             |             |             |
|---|-------------|-------------|-------------|
| C | 3.15562100  | 3.33237600  | 0.13399600  |
| C | 3.10128800  | 4.41044000  | -0.74906800 |
| C | 1.87192400  | 4.73373600  | -1.32050200 |
| C | 0.71839100  | 3.99564900  | -1.04787800 |
| C | 1.76718800  | 5.93284600  | -2.22785800 |
| F | 0.84803200  | 5.75024100  | -3.20044600 |
| F | 2.94572100  | 6.20956900  | -2.83184300 |
| F | 1.40474300  | 7.04285900  | -1.54621400 |
| C | 4.45537800  | 2.92114500  | 0.76729300  |
| F | 4.78756200  | 1.63084100  | 0.43443300  |
| F | 5.48932800  | 3.69069000  | 0.37962800  |
| F | 4.40380000  | 2.95275000  | 2.11383600  |
| C | 4.77527200  | -5.03984400 | -0.54816000 |
| C | 5.68927400  | -4.03155700 | -0.23795500 |
| C | 5.27440400  | -2.70283000 | -0.09159700 |
| C | 3.92433400  | -2.43336800 | -0.26736600 |
| C | 2.99010900  | -3.43254500 | -0.58448800 |
| C | 3.41621400  | -4.74726500 | -0.72555000 |
| N | 3.26734700  | -1.19693900 | -0.16992300 |
| C | 1.92863900  | -1.30387100 | -0.38971400 |
| C | 1.60961100  | -2.79656200 | -0.67636500 |
| O | 1.11569700  | -0.38610400 | -0.36990200 |
| C | 0.60066700  | -3.31338000 | 0.36708200  |
| C | 0.53966600  | -4.70209900 | 0.64219600  |
| N | 0.50414500  | -5.84736800 | 0.87706700  |
| C | -0.55170700 | -2.56980200 | 0.61735400  |
| N | -1.50158300 | -1.91828500 | 0.86822600  |
| H | -9.38856500 | -0.75006400 | -1.59727600 |
| H | -8.46513900 | -2.43175100 | -0.01139900 |
| H | -6.07959400 | -2.35232600 | 0.62608000  |
| H | -5.53275400 | 1.11011800  | -1.87701600 |
| H | -7.90131000 | 1.01598800  | -2.52145900 |
| H | -3.13275000 | -0.58170800 | 2.69026600  |
| H | -4.05470900 | -0.16881400 | 4.94073400  |
| H | -5.71131600 | 1.65148400  | 5.30373200  |
| H | -6.43156400 | 3.06340800  | 3.38662000  |
| H | -5.50369500 | 2.65407200  | 1.12744500  |
| H | 2.07758600  | 1.77949300  | 1.15181100  |
| H | 3.99081900  | 4.97902500  | -0.98796500 |
| H | -0.21815100 | 4.25124900  | -1.52107000 |
| H | 5.11724500  | -6.06524400 | -0.65108200 |
| H | 6.73933600  | -4.27656500 | -0.10471400 |
| H | 5.98007300  | -1.91403100 | 0.15156200  |
| H | 2.70913900  | -5.53315100 | -0.96038000 |

|   |             |             |             |
|---|-------------|-------------|-------------|
| H | 3.69223000  | -0.32083300 | 0.11193400  |
| H | 0.07889900  | 1.13821100  | 0.47882300  |
| C | -3.57616600 | -2.57997900 | -1.64554300 |
| H | -4.53824200 | -2.59054100 | -2.15788200 |
| H | -2.77097800 | -2.94406700 | -2.28327100 |
| H | -3.61904000 | -3.17905400 | -0.73541900 |
| H | -2.84503800 | 0.70542100  | -2.19826500 |
| H | -2.19776000 | -0.74072800 | -3.02773300 |
| H | -3.95554700 | -0.37795900 | -3.09120800 |
| H | -4.02019100 | -1.35279100 | 0.62512800  |
| H | -1.71457700 | 0.24164200  | 0.85993400  |
| H | -4.07907900 | 1.54872200  | -0.30750500 |
| P | 0.88273900  | -2.86343500 | -2.39259800 |
| O | 1.92671800  | -2.07814500 | -3.35581400 |
| O | -0.52790300 | -2.38339400 | -2.53720400 |
| O | 1.12718100  | -4.40616200 | -2.77186000 |
| C | 1.61319100  | -0.76869200 | -3.87323600 |
| H | 2.45293000  | -0.49192900 | -4.51275700 |
| H | 0.69086000  | -0.79745000 | -4.45883300 |
| H | 1.50834500  | -0.04447500 | -3.06093200 |
| C | 0.60851600  | -4.93684000 | -4.00489300 |
| H | 0.77380400  | -6.01409300 | -3.96630300 |
| H | -0.46108900 | -4.72679300 | -4.09398200 |
| H | 1.14774000  | -4.50763100 | -4.85502200 |
| H | -2.31814000 | -1.25801900 | -0.77580200 |
| P | 1.28140300  | -0.58296900 | 3.21207700  |
| O | 2.69228700  | 0.22156700  | 2.83805100  |
| O | 1.74619000  | -2.15560200 | 3.01550900  |
| O | 1.23967000  | -0.53473400 | 4.85833600  |
| H | 1.35801900  | -2.56564700 | 2.20593700  |
| C | 3.95692700  | -0.11606100 | 3.42447100  |
| H | 4.72154100  | 0.43957700  | 2.87872400  |
| H | 3.98200200  | 0.18759300  | 4.47665900  |
| H | 4.14879300  | -1.19101500 | 3.34356100  |
| C | 1.78944200  | -1.51880600 | 5.74314300  |
| H | 1.29219000  | -1.38239800 | 6.70704500  |
| H | 1.60925400  | -2.52963500 | 5.36997600  |
| H | 2.86797300  | -1.37320700 | 5.87458400  |

### TS<sub>OH-CH</sub>

E[6-31G(d); Hartrees] = -4083.849460; G[6-31G(d); Hartrees] = -4083.958909

E[6-311++G(d,p); Hartrees] = -4085.5883800

|   |             |            |             |
|---|-------------|------------|-------------|
| C | -8.22562200 | 1.51643900 | -0.20716500 |
| C | -7.74977800 | 0.34212400 | 0.37724900  |



|   |             |             |             |
|---|-------------|-------------|-------------|
| C | -6.38597200 | 0.05087000  | 0.34873800  |
| C | -5.47658100 | 0.92733000  | -0.26080400 |
| C | -5.96497800 | 2.11346400  | -0.83140300 |
| C | -7.32998400 | 2.40159400  | -0.80963600 |
| C | -4.00241400 | 0.56718500  | -0.25604400 |
| C | -3.10225700 | 1.71164700  | 0.27434900  |
| N | -3.52537800 | 0.04938900  | -1.63524800 |
| N | -1.69081700 | 1.43568700  | -0.00003700 |
| C | -3.36751100 | 1.93674900  | 1.76202600  |
| C | -3.05728100 | 0.94880700  | 2.70802000  |
| C | -3.27262500 | 1.18199000  | 4.06599000  |
| C | -3.80312900 | 2.40090700  | 4.49386500  |
| C | -4.11283600 | 3.38819200  | 3.55813700  |
| C | -3.89339600 | 3.15741000  | 2.19926100  |
| C | -3.38154300 | 1.08049300  | -2.71056700 |
| C | -0.78165100 | 2.44299700  | -0.26527400 |
| N | 0.49021000  | 2.06586100  | 0.04830900  |
| S | -1.24575600 | 3.92536400  | -0.92619700 |
| C | 1.74941100  | 2.66489400  | -0.13927200 |
| C | 2.80348700  | 2.06638300  | 0.57040000  |
| C | 4.11157900  | 2.51017100  | 0.39189800  |
| C | 4.39594100  | 3.57206100  | -0.46430500 |
| C | 3.33936800  | 4.18158500  | -1.14200500 |
| C | 2.02413200  | 3.73927500  | -0.99804200 |
| C | 3.62048000  | 5.37322000  | -2.02169600 |
| F | 2.72169900  | 5.48700700  | -3.02298800 |
| F | 4.84780300  | 5.29750500  | -2.58582200 |
| F | 3.58171400  | 6.52853100  | -1.32096400 |
| C | 5.21047400  | 1.78761800  | 1.12477100  |
| F | 5.27879800  | 0.48320700  | 0.73816600  |
| F | 6.42367100  | 2.33027000  | 0.90116200  |
| F | 5.00553700  | 1.77805600  | 2.45837700  |
| C | 3.28624700  | -5.61384800 | -1.27307500 |
| C | 4.32169200  | -4.81883000 | -0.77733000 |
| C | 4.08189500  | -3.51149000 | -0.33966100 |
| C | 2.77702600  | -3.04459900 | -0.40506100 |
| C | 1.72371700  | -3.83245400 | -0.89300000 |
| C | 1.97527900  | -5.12445000 | -1.33838200 |
| N | 2.30652400  | -1.76192300 | -0.05892600 |
| C | 0.96061300  | -1.68104600 | -0.22709100 |
| C | 0.43931200  | -3.02354800 | -0.79842200 |
| O | 0.24952600  | -0.72230600 | 0.06408800  |
| C | -0.55759600 | -3.58761700 | 0.28634700  |
| C | -0.79697500 | -5.01403500 | 0.19467100  |

|   |             |             |             |
|---|-------------|-------------|-------------|
| N | -0.97582000 | -6.16327300 | 0.16153600  |
| C | -1.80843800 | -2.87148400 | 0.41529600  |
| N | -2.81315400 | -2.31365900 | 0.60415200  |
| H | -9.28721500 | 1.74623900  | -0.18531000 |
| H | -8.43733500 | -0.34627700 | 0.86030200  |
| H | -6.01828600 | -0.86008600 | 0.81405400  |
| H | -5.28445700 | 2.83002200  | -1.28212900 |
| H | -7.69098500 | 3.32441900  | -1.25492100 |
| H | -2.63441400 | -0.00518200 | 2.40014500  |
| H | -3.01734400 | 0.41160700  | 4.78783500  |
| H | -3.96740600 | 2.58166400  | 5.55267400  |
| H | -4.51803700 | 4.34247700  | 3.88366000  |
| H | -4.12300200 | 3.93373100  | 1.47445500  |
| H | 2.59801100  | 1.25851000  | 1.27042700  |
| H | 5.41384600  | 3.91352400  | -0.60349800 |
| H | 1.22301600  | 4.21401000  | -1.54548200 |
| H | 3.49491200  | -6.62546400 | -1.60774200 |
| H | 5.33180300  | -5.21620000 | -0.73218100 |
| H | 4.88336200  | -2.88267900 | 0.03582000  |
| H | 1.17217600  | -5.74738300 | -1.71384300 |
| H | 2.69212400  | -1.22430900 | 0.72739200  |
| H | 0.57112100  | 1.11226300  | 0.40660700  |
| C | -4.36764700 | -1.09805500 | -2.10946900 |
| H | -5.36774300 | -0.73354400 | -2.34117000 |
| H | -3.88244500 | -1.51650200 | -2.98983500 |
| H | -4.39627500 | -1.84799200 | -1.31953800 |
| H | -2.76169000 | 1.90498600  | -2.35560700 |
| H | -2.89771400 | 0.59521700  | -3.55955700 |
| H | -4.37163500 | 1.43738700  | -2.99487300 |
| H | -3.85804800 | -0.31406600 | 0.37095700  |
| H | -1.31159900 | 0.60464200  | 0.44892400  |
| H | -3.32485700 | 2.63734800  | -0.25736700 |
| P | -0.31974900 | -2.68578300 | -2.45152900 |
| O | 0.89327700  | -2.31533800 | -3.44957900 |
| O | -1.42341200 | -1.67226600 | -2.47372600 |
| O | -0.70530300 | -4.16969100 | -2.91182700 |
| C | 1.26777700  | -0.94913100 | -3.72257900 |
| H | 1.78326000  | -0.95944600 | -4.68413400 |
| H | 0.38446200  | -0.30847000 | -3.77549000 |
| H | 1.94753000  | -0.58822600 | -2.94562300 |
| C | -1.25776600 | -4.42945700 | -4.21724000 |
| H | -1.52457200 | -5.48638200 | -4.22590100 |
| H | -2.15069700 | -3.82007100 | -4.38424000 |
| H | -0.51040800 | -4.22301300 | -4.98816700 |

|   |             |             |             |
|---|-------------|-------------|-------------|
| H | -2.58230800 | -0.35604700 | -1.49995200 |
| P | 0.84645900  | -1.56776500 | 3.09254800  |
| O | 2.40112200  | -0.89024100 | 2.65419100  |
| O | 0.89266600  | -2.98224300 | 2.38684300  |
| O | 1.14001400  | -1.92086200 | 4.70130700  |
| H | 0.08087300  | -3.32737600 | 1.40084400  |
| C | 3.59226200  | -1.42485400 | 3.24192600  |
| H | 4.44427200  | -0.90185100 | 2.79909800  |
| H | 3.59610200  | -1.25525100 | 4.32384100  |
| H | 3.68417600  | -2.50150900 | 3.04733600  |
| C | 1.51089200  | -3.22009100 | 5.16544400  |
| H | 1.01459800  | -3.38016400 | 6.12837400  |
| H | 1.20679800  | -3.99510800 | 4.45664600  |
| H | 2.59680900  | -3.28072400 | 5.31559600  |

#### M4

E[6-31G(d); Hartrees] = -4083.848729; G[6-31G(d); Hartrees] = -4083.959415

E[6-311++G(d,p); Hartrees] = -4085.5910607

|   |             |             |             |
|---|-------------|-------------|-------------|
| C | 8.10614100  | -2.05683400 | 0.16452800  |
| C | 7.69986200  | -0.80157000 | 0.61871200  |
| C | 6.36585700  | -0.41262800 | 0.49623200  |
| C | 5.41759800  | -1.27042700 | -0.07956500 |
| C | 5.83500100  | -2.53668700 | -0.51992100 |
| C | 7.17044200  | -2.92345500 | -0.40309000 |
| C | 3.97814800  | -0.80272100 | -0.18456700 |
| C | 2.95736400  | -1.82838100 | 0.37180000  |
| N | 3.61271200  | -0.36547800 | -1.62446700 |
| N | 1.59663200  | -1.46614500 | -0.02681000 |
| C | 3.10542400  | -1.94418800 | 1.88817700  |
| C | 2.71766700  | -0.89396000 | 2.73249100  |
| C | 2.82495000  | -1.02454000 | 4.11654500  |
| C | 3.32890400  | -2.20206900 | 4.67276000  |
| C | 3.71739600  | -3.25121800 | 3.83907900  |
| C | 3.60181000  | -3.12375300 | 2.45406700  |
| C | 3.47143000  | -1.46805100 | -2.62720400 |
| C | 0.62686600  | -2.41886700 | -0.27642800 |
| N | -0.62710100 | -1.93558200 | -0.03970700 |
| S | 1.00896300  | -3.96379900 | -0.83949700 |
| C | -1.90758500 | -2.50248500 | -0.19675700 |
| C | -2.93361100 | -1.91464700 | 0.56083100  |
| C | -4.24632200 | -2.36520600 | 0.42466400  |
| C | -4.55995700 | -3.40557700 | -0.44737400 |
| C | -3.53273700 | -3.98845700 | -1.18976000 |
| C | -2.21494700 | -3.54667100 | -1.08101900 |

|   |             |             |             |
|---|-------------|-------------|-------------|
| C | -3.84714100 | -5.15080500 | -2.09630500 |
| F | -2.97979100 | -5.23644100 | -3.12851600 |
| F | -5.09064300 | -5.05200200 | -2.61978500 |
| F | -3.79293700 | -6.32787900 | -1.43450800 |
| C | -5.32810700 | -1.68097300 | 1.21934800  |
| F | -5.51848400 | -0.40581500 | 0.79289500  |
| F | -6.51559500 | -2.31326100 | 1.11736100  |
| F | -5.01616800 | -1.60691900 | 2.52986800  |
| C | -2.87451900 | 5.74201900  | -1.56637700 |
| C | -3.92515000 | 5.07522200  | -0.93214700 |
| C | -3.73887900 | 3.81405200  | -0.35627100 |
| C | -2.46966300 | 3.25546500  | -0.42485300 |
| C | -1.40114400 | 3.91994200  | -1.04871600 |
| C | -1.59974200 | 5.16590300  | -1.63271600 |
| N | -2.06678400 | 1.99305800  | 0.04696100  |
| C | -0.74138800 | 1.81355100  | -0.15609700 |
| C | -0.16294400 | 3.04963600  | -0.90638000 |
| O | -0.07570700 | 0.83650400  | 0.18732900  |
| C | 0.90336800  | 3.69377600  | 0.06962400  |
| C | 1.29287600  | 5.05676200  | -0.30742400 |
| N | 1.60886800  | 6.13881400  | -0.58313800 |
| C | 2.12271800  | 2.89758900  | 0.26525900  |
| N | 3.11146100  | 2.32589800  | 0.46901300  |
| H | 9.14411000  | -2.36276300 | 0.26061600  |
| H | 8.41795700  | -0.12565100 | 1.07413300  |
| H | 6.05180900  | 0.56153600  | 0.86209800  |
| H | 5.12048100  | -3.23762600 | -0.94187100 |
| H | 7.47623400  | -3.90742600 | -0.74722300 |
| H | 2.30887800  | 0.02907500  | 2.32799000  |
| H | 2.49987500  | -0.20827100 | 4.75482500  |
| H | 3.40874500  | -2.30402700 | 5.75160600  |
| H | 4.10064100  | -4.17481800 | 4.26442600  |
| H | 3.89036900  | -3.94976900 | 1.80952100  |
| H | -2.70475500 | -1.11322000 | 1.26194900  |
| H | -5.58083400 | -3.75149400 | -0.54873500 |
| H | -1.43503500 | -4.00560900 | -1.67047400 |
| H | -3.04288300 | 6.71856800  | -2.01007500 |
| H | -4.90677600 | 5.53860600  | -0.88686200 |
| H | -4.55458000 | 3.28736400  | 0.12885600  |
| H | -0.78547900 | 5.68816500  | -2.12137100 |
| H | -2.42885700 | 1.57932900  | 0.94971300  |
| H | -0.65427100 | -0.98805500 | 0.34464800  |
| C | 4.54162200  | 0.69634900  | -2.13122500 |
| H | 5.53073300  | 0.26439200  | -2.27993900 |

|   |             |             |             |
|---|-------------|-------------|-------------|
| H | 4.13096800  | 1.07264600  | -3.06750000 |
| H | 4.57515500  | 1.50187700  | -1.39833700 |
| H | 2.78096100  | -2.22647400 | -2.25421500 |
| H | 3.07163300  | -1.02577600 | -3.54136200 |
| H | 4.45342100  | -1.90068100 | -2.81954700 |
| H | 3.87328900  | 0.13317000  | 0.36784200  |
| H | 1.25329100  | -0.58140400 | 0.34223900  |
| H | 3.13973200  | -2.80972900 | -0.06718600 |
| P | 0.50699500  | 2.45305300  | -2.52243000 |
| O | -0.76635600 | 1.96623600  | -3.37619600 |
| O | 1.59583000  | 1.42726000  | -2.44307900 |
| O | 0.89565400  | 3.83810500  | -3.22232400 |
| C | -1.19948300 | 0.58737100  | -3.40311000 |
| H | -1.67049000 | 0.43199500  | -4.37480000 |
| H | -0.34932900 | -0.08773000 | -3.28364300 |
| H | -1.92919800 | 0.42121500  | -2.60685600 |
| C | 1.41138800  | 3.87758100  | -4.56880000 |
| H | 1.66756700  | 4.91933700  | -4.76154600 |
| H | 2.30497600  | 3.25274700  | -4.65384300 |
| H | 0.64556000  | 3.54121100  | -5.27270300 |
| H | 2.68589600  | 0.09587300  | -1.57153900 |
| P | -0.81950800 | 1.81773100  | 3.22491000  |
| O | -2.41918700 | 1.17982000  | 2.58424500  |
| O | -0.61859500 | 3.09940700  | 2.38830700  |
| O | -1.36418300 | 2.32742700  | 4.73730900  |
| H | 0.38169800  | 3.69360000  | 1.07451400  |
| C | -3.64380300 | 1.59796700  | 3.18248100  |
| H | -4.46032500 | 1.03027100  | 2.72501400  |
| H | -3.63514700 | 1.40130000  | 4.25987500  |
| H | -3.82891000 | 2.67178200  | 3.02823200  |
| C | -1.74726300 | 3.67893400  | 4.98414400  |
| H | -1.32847300 | 3.98067400  | 5.95105900  |
| H | -1.37529700 | 4.34261900  | 4.19756900  |
| H | -2.84133400 | 3.76329200  | 5.03632200  |

### Prod

E[6-31G(d); Hartrees] = -1308.882333; G[6-31G(d); Hartrees] = -1308.932678

E[6-311++G(d,p); Hartrees] = -1309.4202756

|   |             |             |             |
|---|-------------|-------------|-------------|
| C | -3.48547300 | 1.34555600  | 0.03288900  |
| C | -4.20037500 | 0.19674700  | -0.31045400 |
| C | -3.56315100 | -1.04439800 | -0.41713100 |
| C | -2.19716000 | -1.08764700 | -0.17036600 |
| C | -1.45826400 | 0.05869200  | 0.16854100  |
| C | -2.10656700 | 1.28467900  | 0.27206400  |

|   |             |             |             |
|---|-------------|-------------|-------------|
| N | -1.34682400 | -2.20013800 | -0.19148600 |
| C | -0.04142700 | -1.88269500 | 0.09713500  |
| C | -0.00896000 | -0.34774200 | 0.39609700  |
| O | 0.89936800  | -2.65017700 | 0.11669700  |
| C | 0.41922500  | -0.13485600 | 1.90218800  |
| C | 0.48587700  | 1.29548400  | 2.25708600  |
| N | 0.49986700  | 2.41972900  | 2.54081300  |
| C | 1.66284500  | -0.80954800 | 2.32310200  |
| N | 2.58916400  | -1.34324700 | 2.77045900  |
| H | -3.99891700 | 2.29886700  | 0.11089000  |
| H | -5.26847100 | 0.26125600  | -0.49763400 |
| H | -4.11773300 | -1.94023600 | -0.68033700 |
| H | -1.55373200 | 2.18147300  | 0.52380400  |
| H | -1.61320300 | -3.13978400 | -0.45264300 |
| P | 1.24670700  | 0.43288400  | -0.75402700 |
| O | 1.08888600  | -0.38330700 | -2.13719200 |
| O | 2.61900600  | 0.51301600  | -0.19989500 |
| O | 0.51878800  | 1.83021300  | -1.07380200 |
| C | 2.12579200  | -1.29686700 | -2.57804900 |
| H | 2.00634000  | -1.38411200 | -3.65920700 |
| H | 3.11238800  | -0.89970800 | -2.33251700 |
| H | 1.98707300  | -2.26557500 | -2.09414100 |
| C | 1.29055200  | 2.89732900  | -1.66739200 |
| H | 0.66837300  | 3.79057000  | -1.60354300 |
| H | 2.22237700  | 3.04521800  | -1.11651300 |
| H | 1.50235600  | 2.66642900  | -2.71579500 |
| H | -0.38878100 | -0.56842400 | 2.50881500  |

### TSa

E[6-31G(d); Hartrees] = -3705.101319; G[6-31G(d); Hartrees] = -3705.206889

E[6-311++G(d,p), CPCM, solvent = CH<sub>2</sub>Cl<sub>2</sub>; Hartrees] = -3706.9494476

|   |            |             |             |
|---|------------|-------------|-------------|
| C | 6.58934200 | -1.00545200 | 3.37245500  |
| C | 5.25285300 | -1.32659300 | 3.02870200  |
| C | 4.81521600 | -1.12435000 | 1.67289000  |
| C | 5.73719000 | -0.59475300 | 0.73823000  |
| C | 7.03741300 | -0.29272600 | 1.10901600  |
| C | 7.47145400 | -0.50460100 | 2.44284200  |
| C | 3.46032100 | -1.48832400 | 1.36908000  |
| C | 2.67371000 | -1.97978800 | 2.39188200  |
| C | 3.20965300 | -2.11548700 | 3.69567400  |
| N | 4.44915200 | -1.81384100 | 4.01704900  |
| C | 2.87548800 | -1.35349800 | -0.04180100 |
| C | 2.41112400 | -2.74308700 | -0.53058800 |
| N | 1.60018300 | -2.65287500 | -1.81704600 |

|   |             |             |             |
|---|-------------|-------------|-------------|
| C | 2.39732300  | -2.13376500 | -2.98564600 |
| C | 3.63014900  | -3.04658800 | -3.18791600 |
| C | 3.53533400  | -4.25009800 | -2.22751100 |
| C | 3.58658200  | -3.72626300 | -0.77952300 |
| C | 2.19624100  | -4.99064700 | -2.50361000 |
| C | 1.04186000  | -4.02106300 | -2.12705200 |
| C | 2.06363800  | -6.30863400 | -1.78366000 |
| C | 2.01525400  | -7.49453900 | -2.39077300 |
| O | 7.83702200  | 0.20793000  | 0.12399800  |
| C | 9.16043800  | 0.60462000  | 0.45112900  |
| N | 1.78549200  | -0.38055100 | -0.09608800 |
| C | 1.91932500  | 0.88572000  | -0.61241400 |
| S | 3.21659500  | 1.35840800  | -1.58840600 |
| N | 0.85983000  | 1.68402000  | -0.28840400 |
| C | 0.63657300  | 3.05275800  | -0.54602500 |
| C | -0.69528100 | 3.45377500  | -0.69822700 |
| C | -1.01024800 | 4.80788300  | -0.81830000 |
| C | -0.01019700 | 5.77602100  | -0.82786200 |
| C | 1.31912200  | 5.36466600  | -0.70199300 |
| C | 1.65237000  | 4.02035900  | -0.54670000 |
| C | -2.46116800 | 5.19027700  | -0.92007400 |
| F | -3.06646100 | 4.62011800  | -1.98420300 |
| C | 2.41419700  | 6.39828600  | -0.76547500 |
| F | 2.01660200  | 7.57671000  | -0.23224100 |
| F | -3.15867100 | 4.77543400  | 0.17927700  |
| F | -2.64128100 | 6.52192400  | -1.01597800 |
| F | 3.52212100  | 6.00627600  | -0.10208600 |
| F | 2.78349300  | 6.65199500  | -2.04128900 |
| H | 2.57743500  | -2.50197000 | 4.49392600  |
| H | 1.64368900  | -2.28429800 | 2.21979400  |
| H | 0.07498800  | 1.21045800  | 0.16656300  |
| H | 6.89090200  | -1.17019200 | 4.40196800  |
| H | 0.99560200  | -0.54362600 | 0.52772200  |
| H | 3.63548000  | -0.96820300 | -0.71915200 |
| H | -1.48234400 | 2.70787000  | -0.73853300 |
| H | 2.66163300  | -1.09478700 | -2.77526300 |
| H | 2.68428600  | 3.72657600  | -0.41786100 |
| H | 4.54366000  | -3.22001200 | -0.61290100 |
| H | -0.25587800 | 6.82636700  | -0.92130300 |
| H | 1.71843500  | -2.14266100 | -3.84211200 |
| H | 8.48749200  | -0.26897500 | 2.73768900  |
| H | 5.44652900  | -0.36312100 | -0.27988800 |
| H | 1.69626200  | -3.15143100 | 0.18451200  |
| H | 3.54076800  | -4.55003300 | -0.06193700 |

|   |             |             |             |
|---|-------------|-------------|-------------|
| H | 3.67752900  | -3.38899900 | -4.22703600 |
| H | 4.36930400  | -4.93610900 | -2.40428500 |
| H | 0.31963200  | -3.89173900 | -2.93639300 |
| H | 0.49951800  | -4.33335300 | -1.23125600 |
| H | 2.15392600  | -5.19216500 | -3.58124800 |
| H | 4.54965800  | -2.48477600 | -2.99194300 |
| H | 9.58840700  | 0.99722700  | -0.47290300 |
| H | 9.16992300  | 1.39171400  | 1.21606800  |
| H | 9.76579400  | -0.24394700 | 0.79633800  |
| H | 1.99725800  | -6.26380100 | -0.69603700 |
| H | 1.92494200  | -8.41930800 | -1.82828100 |
| H | 2.06152800  | -7.58744900 | -3.47424800 |
| C | -6.65086100 | -0.58137900 | 2.73133300  |
| C | -6.38005800 | 0.68978200  | 3.23677200  |
| C | -5.11788700 | 1.27603000  | 3.07207600  |
| C | -4.16052000 | 0.54494200  | 2.38269000  |
| C | -4.41754900 | -0.72966500 | 1.84981500  |
| C | -5.67098800 | -1.30325400 | 2.03463500  |
| N | -2.82434000 | 0.90544200  | 2.12217500  |
| C | -2.16794900 | -0.08738300 | 1.44490300  |
| C | -3.17440400 | -1.20998200 | 1.15878000  |
| O | -0.97263600 | -0.04569300 | 1.13895100  |
| C | -2.69088200 | -2.55553900 | 1.47589800  |
| C | -1.36519600 | -2.96440300 | 1.25747700  |
| N | -0.27710900 | -3.37169400 | 1.08623800  |
| C | -3.55440800 | -3.55384100 | 1.98938200  |
| N | -4.25366700 | -4.38439600 | 2.42473500  |
| H | -7.62995600 | -1.02561500 | 2.88359900  |
| H | -7.15095500 | 1.23395000  | 3.77542400  |
| H | -4.90109000 | 2.25980700  | 3.47621900  |
| H | -5.88801900 | -2.29657500 | 1.66375300  |
| H | 0.77023900  | -2.03383200 | -1.67146700 |
| C | -5.86732900 | -1.90013000 | -1.19373500 |
| C | -4.47680800 | -2.10002200 | -1.11824800 |
| C | -3.98352000 | -3.39448800 | -1.36714200 |
| C | -4.84308500 | -4.44666500 | -1.67680400 |
| C | -6.21789000 | -4.23362000 | -1.75410700 |
| C | -6.72082500 | -2.95492900 | -1.51449100 |
| H | -6.28559400 | -0.92348100 | -1.00204200 |
| H | -2.91863200 | -3.58482200 | -1.31950600 |
| H | -4.43120300 | -5.43638400 | -1.85293400 |
| H | -6.88915800 | -5.05278200 | -1.99651500 |
| H | -7.79018000 | -2.76964200 | -1.57283700 |
| C | -3.49601000 | -1.02025100 | -0.72224100 |



|   |             |             |             |
|---|-------------|-------------|-------------|
| C | -3.78853200 | 0.44553100  | -0.99008700 |
| N | -2.22207800 | -1.27550300 | -1.27796600 |
| C | -1.14126900 | -1.46707000 | -1.68204600 |
| O | -2.92281700 | 1.23950800  | -1.31116400 |
| O | -5.05739900 | 0.80874800  | -0.75759800 |
| C | -5.34303100 | 2.21288200  | -0.93017100 |
| H | -6.41406400 | 2.30638000  | -0.75340100 |
| H | -4.77827400 | 2.80876300  | -0.21164000 |
| H | -5.08071600 | 2.53415800  | -1.94012600 |
| C | -2.18905800 | 2.12469900  | 2.58827300  |
| H | -2.54231700 | 2.99484200  | 2.02469300  |
| H | -2.40026600 | 2.27102600  | 3.65238500  |
| H | -1.11283900 | 2.01802700  | 2.44897700  |

### TSb

E[6-31G(d); Hartrees] = -3705.097819; G[6-31G(d); Hartrees] = -3705.205044

E[6-311++G(d,p), CPCM, solvent = CH<sub>2</sub>Cl<sub>2</sub>; Hartrees] = -3706.9460178

|   |            |             |             |
|---|------------|-------------|-------------|
| C | 7.29925300 | -2.08098400 | 2.40713900  |
| C | 5.88334900 | -2.03945400 | 2.44336600  |
| C | 5.16443100 | -1.73057700 | 1.23599400  |
| C | 5.90745800 | -1.46256700 | 0.06050000  |
| C | 7.29172200 | -1.51185900 | 0.06097100  |
| C | 7.99830900 | -1.83041900 | 1.24887700  |
| C | 3.73099600 | -1.72614600 | 1.31815700  |
| C | 3.14980300 | -1.98415600 | 2.54285300  |
| C | 3.96302800 | -2.25467300 | 3.67012900  |
| N | 5.27757100 | -2.29665100 | 3.63793100  |
| C | 2.84991600 | -1.48115100 | 0.08664000  |
| C | 2.07579100 | -2.77352900 | -0.26083900 |
| N | 1.12789300 | -2.55059600 | -1.43334600 |
| C | 1.84744000 | -2.21127800 | -2.71442600 |
| C | 2.84841400 | -3.34500900 | -3.03640200 |
| C | 2.64852700 | -4.49661300 | -2.03039700 |
| C | 2.98999900 | -3.97634600 | -0.62097800 |
| C | 1.16711600 | -4.96376900 | -2.10682800 |
| C | 0.27861500 | -3.78434300 | -1.62355500 |
| C | 0.88435800 | -6.22383900 | -1.32954000 |
| C | 0.53862500 | -7.38714100 | -1.88125500 |
| O | 7.89843000 | -1.23886200 | -1.13034600 |
| C | 9.31633300 | -1.18521300 | -1.17956100 |
| N | 1.91400700 | -0.37412200 | 0.25797000  |
| C | 2.08760300 | 0.86336400  | -0.28980900 |
| S | 3.33343100 | 1.23165900  | -1.37407700 |
| N | 1.11949400 | 1.75974400  | 0.08856600  |

|   |             |             |             |
|---|-------------|-------------|-------------|
| C | 1.10069100  | 3.15207100  | -0.16294200 |
| C | -0.11020700 | 3.74573500  | -0.52366800 |
| C | -0.19500900 | 5.13093100  | -0.67602800 |
| C | 0.92639000  | 5.93640000  | -0.50405200 |
| C | 2.13932000  | 5.33372800  | -0.15882400 |
| C | 2.23282400  | 3.95679300  | 0.02665100  |
| C | -1.53892600 | 5.73602200  | -0.97387900 |
| F | -2.22129600 | 5.01644800  | -1.89223700 |
| C | 3.36921400  | 6.19213100  | -0.01584600 |
| F | 4.29930300  | 5.61899900  | 0.77644300  |
| F | -2.32173600 | 5.77732900  | 0.13829900  |
| F | -1.44455100 | 7.00042200  | -1.43204300 |
| F | 3.95505100  | 6.42567700  | -1.21240500 |
| F | 3.07167100  | 7.40090500  | 0.51437800  |
| H | 3.49161900  | -2.45373800 | 4.63172400  |
| H | 2.06967400  | -1.98581300 | 2.65787800  |
| H | 0.24588600  | 1.38900600  | 0.46182300  |
| H | 7.81267400  | -2.31742400 | 3.33367600  |
| H | 1.18322300  | -0.52649500 | 0.96172000  |
| H | 3.48462300  | -1.19723400 | -0.75056600 |
| H | -0.98620700 | 3.12661300  | -0.66590100 |
| H | 2.32078300  | -1.23557100 | -2.58365600 |
| H | 3.17224400  | 3.51189600  | 0.32433100  |
| H | 4.04064700  | -3.67079000 | -0.59537000 |
| H | 0.85998900  | 7.01053600  | -0.62728600 |
| H | 1.06865200  | -2.10341300 | -3.47312800 |
| H | 9.08149100  | -1.86922500 | 1.25501100  |
| H | 5.42514200  | -1.15770300 | -0.86087000 |
| H | 1.40988000  | -3.00747500 | 0.57178800  |
| H | 2.87781700  | -4.76628400 | 0.12685900  |
| H | 2.69662800  | -3.69962000 | -4.06132500 |
| H | 3.30480000  | -5.33432300 | -2.28485200 |
| H | -0.50404200 | -3.52156800 | -2.33754500 |
| H | -0.21489200 | -3.97311700 | -0.66885200 |
| H | 0.94531100  | -5.16608300 | -3.16219900 |
| H | 3.87585300  | -2.97113900 | -2.97378200 |
| H | 9.56686600  | -0.91573700 | -2.20709400 |
| H | 9.71633800  | -0.42284300 | -0.49882400 |
| H | 9.76877400  | -2.15704700 | -0.94164900 |
| H | 0.97109700  | -6.15522000 | -0.24447900 |
| H | 0.35368300  | -8.27158900 | -1.27843500 |
| H | 0.42616800  | -7.50080300 | -2.95783200 |
| C | -7.21082500 | -0.74781000 | 2.50415000  |
| C | -7.81166200 | -1.82261200 | 1.84854900  |

|   |             |             |             |
|---|-------------|-------------|-------------|
| C | -7.06161800 | -2.67190300 | 1.02698100  |
| C | -5.70744600 | -2.39745100 | 0.88419400  |
| C | -5.08380700 | -1.30700400 | 1.51833200  |
| C | -5.84407500 | -0.48281800 | 2.34327700  |
| N | -4.76002700 | -3.13530700 | 0.16227000  |
| C | -3.49406300 | -2.61529300 | 0.32166100  |
| C | -3.63075600 | -1.31429300 | 1.13596700  |
| O | -2.47323100 | -3.12565400 | -0.11999300 |
| C | -2.62242200 | -1.13324600 | 2.18393500  |
| C | -1.27900300 | -1.48447000 | 2.00771600  |
| N | -0.13462900 | -1.73158400 | 1.90964400  |
| C | -2.89715200 | -0.34874200 | 3.32761500  |
| N | -3.13476300 | 0.31841800  | 4.26040000  |
| H | -7.80380700 | -0.10915200 | 3.15203900  |
| H | -8.87310400 | -2.01328400 | 1.98162900  |
| H | -7.52316100 | -3.51753200 | 0.52707000  |
| H | -5.38933700 | 0.34615800  | 2.86841200  |
| H | 0.46730100  | -1.76709600 | -1.23006100 |
| C | -5.80573800 | 0.63990400  | -0.97196000 |
| C | -4.58256300 | -0.00267400 | -1.23441500 |
| C | -4.46620900 | -0.72697200 | -2.43567100 |
| C | -5.52278200 | -0.79784200 | -3.34165000 |
| C | -6.72711100 | -0.14767100 | -3.07313800 |
| C | -6.85834300 | 0.56773500  | -1.88344000 |
| H | -5.93859200 | 1.19813400  | -0.05743500 |
| H | -3.53886200 | -1.23681700 | -2.67029900 |
| H | -5.39630400 | -1.35842900 | -4.26429800 |
| H | -7.55001400 | -0.19665900 | -3.78097300 |
| H | -7.78920300 | 1.07956800  | -1.65460700 |
| C | -3.42529500 | 0.00970000  | -0.25795700 |
| C | -3.10094600 | 1.25496000  | 0.55143800  |
| N | -2.22001200 | -0.35380800 | -0.89258400 |
| C | -1.19617900 | -0.70165500 | -1.33956500 |
| O | -1.95565500 | 1.60208900  | 0.78493900  |
| O | -4.16745600 | 1.87028900  | 1.06041600  |
| C | -3.89000200 | 2.98163900  | 1.95096000  |
| H | -4.87105300 | 3.37143600  | 2.22127500  |
| H | -3.36089400 | 2.61510700  | 2.83333200  |
| H | -3.30230300 | 3.74106500  | 1.43246400  |
| C | -5.03401300 | -4.35103500 | -0.57371300 |
| H | -5.48217000 | -5.10837300 | 0.07991200  |
| H | -5.71492100 | -4.15114200 | -1.40899900 |
| H | -4.08286700 | -4.72224800 | -0.95768000 |

**Nu'**

B3LYP/6-31+G(d,p)-CPCM(mesitylene): E = -647.410886 Hartrees; G = -647.444401 Hartrees

M06-2X/6-311++G(d,p)-CPCM(mesitylene): single-point energy = -647.4467159 Hartrees

|   |             |             |             |
|---|-------------|-------------|-------------|
| P | -0.03993200 | -0.84459300 | -0.52984100 |
| O | 1.18418000  | 0.23951600  | -0.71311900 |
| O | 0.18562000  | -1.14854000 | 1.11032300  |
| O | -1.42208100 | 0.05890300  | -0.50859600 |
| H | -0.16877400 | -2.01493700 | 1.35550400  |
| C | 1.79398000  | 1.06026400  | 0.30343500  |
| H | 2.72301600  | 1.43774000  | -0.12716400 |
| H | 1.14656600  | 1.90283800  | 0.56294500  |
| H | 2.01009000  | 0.47196400  | 1.19764100  |
| C | -1.68937500 | 1.16394000  | 0.37606600  |
| H | -2.77030300 | 1.31644300  | 0.37430400  |
| H | -1.35327200 | 0.94196500  | 1.39274800  |
| H | -1.19772300 | 2.06863900  | 0.00576400  |

**M1-O'**

B3LYP/6-31+G(d,p)-CPCM(mesitylene): E = -3436.665663 Hartrees; G = -3436.769538

Hartrees

M06-2X/6-311++G(d,p)-CPCM(mesitylene): single-point energy = -3436.9229871 Hartrees

|   |             |             |             |
|---|-------------|-------------|-------------|
| N | 1.32126100  | -1.27708200 | 0.11334400  |
| C | 0.29940400  | -2.15892900 | 0.24339300  |
| N | -0.92719900 | -1.53247100 | 0.25507800  |
| S | 0.51487300  | -3.83140600 | 0.39652900  |
| C | -2.20830700 | -2.10636700 | 0.18959000  |
| C | -3.23405000 | -1.50151300 | 0.92778100  |
| C | -4.54255700 | -1.98518600 | 0.84033400  |
| C | -4.85111100 | -3.08008700 | 0.03604300  |
| C | -3.81997600 | -3.67703100 | -0.69762800 |
| C | -2.51169500 | -3.20117500 | -0.63647300 |
| C | -4.13333400 | -4.88121200 | -1.54773200 |
| F | -3.23837900 | -5.05890800 | -2.54936500 |
| F | -5.36060400 | -4.79423800 | -2.12381100 |
| F | -4.13447100 | -6.03103400 | -0.81904200 |
| C | -5.62389000 | -1.27388700 | 1.60990800  |
| F | -5.26195600 | -1.02580100 | 2.89429300  |
| F | -5.91712800 | -0.05984100 | 1.05848400  |
| F | -6.78344200 | -1.96998500 | 1.64956300  |
| C | -3.30326500 | 6.30038600  | -1.37182400 |
| C | -3.87245500 | 5.35220200  | -2.23284200 |
| C | -3.66034000 | 3.97730000  | -2.05357700 |
| C | -2.86164100 | 3.58910400  | -0.98951600 |
| C | -2.27426600 | 4.52826800  | -0.10538100 |

|   |             |             |             |
|---|-------------|-------------|-------------|
| C | -2.50115100 | 5.89785900  | -0.30189900 |
| N | -2.50778000 | 2.29316700  | -0.59552500 |
| C | -1.69430300 | 2.30475400  | 0.50499300  |
| C | -1.51890000 | 3.77189300  | 0.87315100  |
| O | -1.23124800 | 1.33311900  | 1.08946100  |
| C | -0.78707900 | 4.17314200  | 1.95599600  |
| C | -0.09042500 | 3.27510500  | 2.82900000  |
| N | 0.51718800  | 2.64233200  | 3.59362600  |
| C | -0.64622600 | 5.55666700  | 2.29451600  |
| N | -0.52731700 | 6.68063700  | 2.57302600  |
| H | -3.00239800 | -0.65838800 | 1.56999900  |
| H | -5.86472500 | -3.45574200 | -0.02443600 |
| H | -1.73259700 | -3.66574600 | -1.22339000 |
| H | -3.48695300 | 7.35662600  | -1.53635400 |
| H | -4.49422800 | 5.68511000  | -3.05818500 |
| H | -4.10660000 | 3.24863100  | -2.72191900 |
| H | -2.06416300 | 6.63692800  | 0.35854700  |
| H | -2.76125500 | 1.44422700  | -1.08183500 |
| P | 1.26444300  | 2.48326200  | -1.47862700 |
| O | 1.09409600  | 0.92416200  | -1.58857300 |
| O | 2.80583200  | 2.55693800  | -0.77054900 |
| O | 1.80751000  | 2.97726500  | -3.01861200 |
| C | 2.72566500  | -1.62462500 | 0.32458900  |
| H | 2.82371500  | -2.68400300 | 0.07769600  |
| C | 3.65913200  | -0.78318300 | -0.59227200 |
| H | 3.63617100  | 0.25497800  | -0.24895800 |
| C | 3.13894900  | -1.44782600 | 1.78714200  |
| C | 3.75303000  | -2.49832700 | 2.47946200  |
| C | 2.89447400  | -0.24173500 | 2.45964300  |
| C | 4.12901100  | -2.34478600 | 3.81726300  |
| H | 3.93077500  | -3.44386100 | 1.97539300  |
| C | 3.26401700  | -0.08736100 | 3.79733300  |
| H | 2.39811400  | 0.57925400  | 1.94959800  |
| C | 3.88664500  | -1.13825500 | 4.47888500  |
| H | 4.60100700  | -3.17043900 | 4.34196100  |
| H | 3.05340400  | 0.84893000  | 4.30494100  |
| H | 4.17144100  | -1.01979300 | 5.52031500  |
| C | 5.09847400  | -1.27094900 | -0.54809500 |
| C | 6.11443700  | -0.35800300 | -0.22878800 |
| C | 5.45304400  | -2.60537500 | -0.80474100 |
| C | 7.45088000  | -0.76039200 | -0.17349500 |
| H | 5.85590500  | 0.67486400  | -0.01249100 |
| C | 6.78974100  | -3.00879000 | -0.75832400 |
| H | 4.69253400  | -3.34694200 | -1.02760100 |

|   |             |             |             |
|---|-------------|-------------|-------------|
| C | 7.79288300  | -2.08788300 | -0.44316900 |
| H | 8.22066500  | -0.03861000 | 0.08254700  |
| H | 7.04405000  | -4.04522500 | -0.95918700 |
| H | 8.83066700  | -2.40471300 | -0.40090300 |
| N | 3.11515000  | -0.65926000 | -2.02203800 |
| C | 4.02690200  | 0.14576000  | -2.89179100 |
| H | 3.50215100  | 0.35205400  | -3.82529100 |
| H | 4.24104300  | 1.08849700  | -2.38969900 |
| H | 4.94487000  | -0.40869900 | -3.08649200 |
| H | 1.09686900  | -0.32488800 | -0.20521400 |
| H | -0.92392800 | -0.53947300 | 0.49568200  |
| C | 0.81453700  | 3.33366000  | -3.98117400 |
| H | 1.31409200  | 3.88726600  | -4.78063700 |
| H | 0.33828900  | 2.44329200  | -4.41197500 |
| H | 0.03602600  | 3.97332100  | -3.54349300 |
| C | 3.34911100  | 3.85312200  | -0.49444400 |
| H | 2.61304800  | 4.50017600  | 0.00006200  |
| H | 4.20092400  | 3.71390600  | 0.17580600  |
| H | 3.68688100  | 4.33994400  | -1.41618700 |
| C | 2.72824200  | -1.92963200 | -2.70052900 |
| H | 2.20827900  | -1.66732100 | -3.62339300 |
| H | 3.61928000  | -2.51070100 | -2.94126800 |
| H | 2.05885800  | -2.50819700 | -2.06564900 |
| H | 2.22671800  | -0.02683600 | -1.91252000 |

### M1-N'

B3LYP/6-31+G(d,p)-CPCM(mesitylene): E = -3436.658416 Hartrees; G = -3436.762030 Hartrees

M06-2X/6-311++G(d,p)-CPCM(mesitylene): single-point energy = -3436.9166489 Hartrees

|   |             |            |             |
|---|-------------|------------|-------------|
| C | -1.67286800 | 7.88579700 | -0.15777200 |
| C | -2.71102700 | 6.95148700 | -0.12307100 |
| C | -2.42794900 | 5.58808500 | -0.23257700 |
| C | -1.10801000 | 5.13471900 | -0.37528600 |
| C | -0.07149800 | 6.08218100 | -0.39494800 |
| C | -0.35282500 | 7.44667200 | -0.29255700 |
| C | -0.84767500 | 3.64120200 | -0.49296700 |
| C | 0.19281700  | 3.14516800 | 0.55405100  |
| N | -0.50023100 | 3.20348800 | -1.92058300 |
| N | 0.65407000  | 1.78681300 | 0.27229900  |
| C | -0.40154600 | 3.26147500 | 1.95890500  |
| C | -1.48981000 | 2.46613700 | 2.34792100  |
| C | -2.02318400 | 2.57119700 | 3.63386100  |
| C | -1.47191000 | 3.47381800 | 4.54972500  |
| C | -0.38409600 | 4.26478100 | 4.17242500  |

|   |             |             |             |
|---|-------------|-------------|-------------|
| C | 0.14806300  | 4.15735700  | 2.88353100  |
| C | 0.87568200  | 3.53127400  | -2.39601100 |
| C | 1.93465200  | 1.37364300  | 0.45489700  |
| N | 2.04897600  | 0.00332300  | 0.38884800  |
| S | 3.23221100  | 2.42296700  | 0.74824700  |
| C | 3.21275900  | -0.78094300 | 0.29888500  |
| C | 3.21806200  | -2.02042200 | 0.95820200  |
| C | 4.32514300  | -2.86124900 | 0.85477600  |
| C | 5.44423800  | -2.49114500 | 0.10444700  |
| C | 5.42501500  | -1.26043600 | -0.55208100 |
| C | 4.32182700  | -0.40780300 | -0.47041400 |
| C | 6.58568900  | -0.84897500 | -1.42020700 |
| F | 6.30624200  | -1.00913000 | -2.74581900 |
| F | 7.70500000  | -1.57077800 | -1.17273500 |
| F | 6.91080700  | 0.45826300  | -1.25834000 |
| C | 4.30994900  | -4.20803600 | 1.52926600  |
| F | 3.42059600  | -4.27181600 | 2.54820600  |
| F | 3.97777500  | -5.20538000 | 0.66142200  |
| F | 5.52455500  | -4.53820300 | 2.03900600  |
| C | -7.16807400 | -3.83393700 | 0.39835900  |
| C | -7.10133400 | -4.95024000 | -0.44788500 |
| C | -5.87473200 | -5.47179500 | -0.88249300 |
| C | -4.71991300 | -4.84201000 | -0.44221600 |
| C | -4.76201300 | -3.71170600 | 0.41522000  |
| C | -6.00123600 | -3.20532400 | 0.83507400  |
| N | -3.39060500 | -5.16321000 | -0.72778800 |
| C | -2.51511700 | -4.30716500 | -0.09959500 |
| C | -3.39357700 | -3.31123200 | 0.65282500  |
| O | -1.29874300 | -4.36042200 | -0.12053300 |
| C | -2.86554200 | -2.27242500 | 1.36684800  |
| C | -1.46419100 | -1.98187100 | 1.40834600  |
| N | -0.35529100 | -1.64015100 | 1.48209300  |
| C | -3.68579000 | -1.35906300 | 2.10127900  |
| N | -4.34429800 | -0.62052000 | 2.71457500  |
| H | -1.88887700 | 8.94650300  | -0.07217800 |
| H | -3.73933700 | 7.28028500  | -0.00710700 |
| H | -3.24130800 | 4.86825600  | -0.19683200 |
| H | 0.96422100  | 5.76804600  | -0.47535100 |
| H | 0.46199800  | 8.16422600  | -0.30919400 |
| H | -1.92335300 | 1.75098800  | 1.65343900  |
| H | -2.86493700 | 1.94646400  | 3.91756900  |
| H | -1.88506900 | 3.55495100  | 5.55087000  |
| H | 0.05539400  | 4.96225400  | 4.87957200  |
| H | 1.00007800  | 4.76795800  | 2.59887600  |

|   |             |             |             |
|---|-------------|-------------|-------------|
| H | 2.35949800  | -2.31425200 | 1.55115400  |
| H | 6.30740000  | -3.14140800 | 0.03714700  |
| H | 4.32305800  | 0.53852400  | -0.99345400 |
| H | -8.13352400 | -3.45459500 | 0.71518100  |
| H | -8.02033800 | -5.42496900 | -0.77788800 |
| H | -5.83354900 | -6.33415700 | -1.53928900 |
| H | -6.05807900 | -2.34180500 | 1.48685100  |
| H | -3.08020000 | -5.93839500 | -1.29664400 |
| H | 1.20435600  | -0.51952000 | 0.62026500  |
| C | -1.51947300 | 3.67393100  | -2.90751300 |
| H | -1.49501700 | 4.76074100  | -2.98492000 |
| H | -1.28348200 | 3.22331600  | -3.87191400 |
| H | -2.50562700 | 3.33585700  | -2.58967200 |
| H | 1.61651400  | 3.20673900  | -1.66694600 |
| H | 1.03863500  | 2.99869900  | -3.33441000 |
| H | 0.96241800  | 4.60481100  | -2.56953000 |
| H | -1.79097300 | 3.11835100  | -0.31303500 |
| H | -0.00647000 | 1.13277500  | -0.17224600 |
| H | 1.08123300  | 3.77822700  | 0.51303200  |
| P | -2.40460200 | -0.03512600 | -1.64930600 |
| O | -2.05221000 | -1.63904500 | -2.05820000 |
| O | -0.98500400 | 0.67304100  | -1.67870800 |
| O | -3.17259600 | 0.51268000  | -3.05912400 |
| C | -0.84732500 | -2.05965700 | -2.71653200 |
| H | -0.52924400 | -2.99876400 | -2.25605500 |
| H | -1.03954900 | -2.22556300 | -3.78323700 |
| H | -0.05823700 | -1.31104400 | -2.60309800 |
| C | -2.60197000 | 0.33689800  | -4.35992300 |
| H | -3.13285400 | 1.00216700  | -5.04698500 |
| H | -1.53436000 | 0.58679400  | -4.37057500 |
| H | -2.72937300 | -0.69706300 | -4.70027400 |
| H | -0.63936900 | 2.11685700  | -1.89348000 |

### M1-O''

B3LYP/6-311+G(d,p)-CPCM(mesitylene): E = -3437.317891 Hartrees; G = -3437.422436 Hartrees

M06-2X/6-311++G(d,p)-CPCM(mesitylene): single-point energy = -3436.9253898 Hartrees

|   |             |             |            |
|---|-------------|-------------|------------|
| N | 1.35066600  | -1.24420300 | 0.13644400 |
| C | 0.34658100  | -2.14288100 | 0.26672500 |
| N | -0.89133900 | -1.54010100 | 0.26088300 |
| S | 0.59004200  | -3.80678800 | 0.43860100 |
| C | -2.15848000 | -2.14075200 | 0.19550200 |
| C | -3.19808800 | -1.55541000 | 0.92401400 |
| C | -4.49238600 | -2.06620300 | 0.83456700 |



|   |             |             |             |
|---|-------------|-------------|-------------|
| C | -4.77329300 | -3.17057000 | 0.03904000  |
| C | -3.72893800 | -3.74894300 | -0.68419000 |
| C | -2.43484700 | -3.24513900 | -0.62163300 |
| C | -4.00779600 | -4.96698300 | -1.52432000 |
| F | -3.13538400 | -5.10036800 | -2.54758900 |
| F | -5.24934800 | -4.94040100 | -2.06421500 |
| F | -3.93058900 | -6.11104300 | -0.79792600 |
| C | -5.59118200 | -1.37215200 | 1.59248600  |
| F | -5.23866300 | -1.10147500 | 2.87064300  |
| F | -5.91028200 | -0.17514200 | 1.02648000  |
| F | -6.73035800 | -2.09273000 | 1.63761800  |
| C | -3.45220600 | 6.25151100  | -1.34682000 |
| C | -4.00431000 | 5.29946100  | -2.20882500 |
| C | -3.76563700 | 3.93135600  | -2.03811600 |
| C | -2.95835900 | 3.55290600  | -0.98095400 |
| C | -2.38807100 | 4.49688300  | -0.09504600 |
| C | -2.64076100 | 5.85978400  | -0.28448700 |
| N | -2.57762600 | 2.26358800  | -0.59590200 |
| C | -1.76083600 | 2.28303600  | 0.50124200  |
| C | -1.61356000 | 3.75258400  | 0.87513800  |
| O | -1.27911300 | 1.32348800  | 1.07436900  |
| C | -0.88755500 | 4.16269800  | 1.95321800  |
| C | -0.17059500 | 3.27719000  | 2.81601100  |
| N | 0.44814500  | 2.65516000  | 3.56765900  |
| C | -0.77328100 | 5.54307100  | 2.29814000  |
| N | -0.67484300 | 6.65879800  | 2.58269900  |
| H | -2.98698500 | -0.70579900 | 1.56164300  |
| H | -5.77664300 | -3.56750500 | -0.02302800 |
| H | -1.64527900 | -3.69483200 | -1.20291800 |
| H | -3.65666000 | 7.30288000  | -1.50526800 |
| H | -4.63403400 | 5.62441400  | -3.02886000 |
| H | -4.19921400 | 3.19947300  | -2.70826300 |
| H | -2.21698000 | 6.60290500  | 0.37699200  |
| H | -2.81760800 | 1.41351000  | -1.08467200 |
| P | 1.22310700  | 2.49522700  | -1.49288100 |
| O | 1.08566300  | 0.93685500  | -1.55849000 |
| O | 2.78816400  | 2.61647400  | -0.85174400 |
| O | 1.69539100  | 2.95955500  | -3.06336500 |
| C | 2.76018200  | -1.56759600 | 0.34459400  |
| H | 2.87130600  | -2.62747700 | 0.11448200  |
| C | 3.67552900  | -0.72797400 | -0.59019900 |
| H | 3.63657800  | 0.31380000  | -0.26532000 |
| C | 3.18043700  | -1.36284300 | 1.80037400  |
| C | 3.82947900  | -2.38491800 | 2.49661400  |

|   |             |             |             |
|---|-------------|-------------|-------------|
| C | 2.90758300  | -0.15990400 | 2.46036800  |
| C | 4.21170300  | -2.20596700 | 3.82578300  |
| H | 4.03009100  | -3.32908200 | 2.00294000  |
| C | 3.28381500  | 0.01942600  | 3.78947600  |
| H | 2.38251700  | 0.63892900  | 1.94802600  |
| C | 3.94107300  | -1.00274500 | 4.47467200  |
| H | 4.71082400  | -3.01015300 | 4.35475200  |
| H | 3.05061500  | 0.95259900  | 4.28877400  |
| H | 4.23074600  | -0.86497900 | 5.51035300  |
| C | 5.12130500  | -1.19112200 | -0.54544800 |
| C | 6.12165800  | -0.25899300 | -0.24791900 |
| C | 5.49415300  | -2.52130600 | -0.77902700 |
| C | 7.46096100  | -0.63901400 | -0.19133900 |
| H | 5.84888000  | 0.77173300  | -0.04979200 |
| C | 6.83388000  | -2.90194600 | -0.73137800 |
| H | 4.74596700  | -3.27708400 | -0.98577300 |
| C | 7.82109400  | -1.96238300 | -0.43778900 |
| H | 8.21968700  | 0.09723400  | 0.04777200  |
| H | 7.10393800  | -3.93568600 | -0.91432500 |
| H | 8.86200100  | -2.26177600 | -0.39441300 |
| N | 3.12200400  | -0.63703500 | -2.01867100 |
| C | 4.00961100  | 0.17891900  | -2.90171300 |
| H | 3.48472900  | 0.34508500  | -3.84121700 |
| H | 4.18721800  | 1.13791800  | -2.42000900 |
| H | 4.94507100  | -0.34796700 | -3.07901600 |
| H | 1.11101700  | -0.30279400 | -0.20147700 |
| H | -0.90850900 | -0.54763000 | 0.49558900  |
| C | 0.66968100  | 3.25355000  | -4.00998000 |
| H | 1.12836800  | 3.79969900  | -4.83585500 |
| H | 0.21526500  | 2.33674800  | -4.40283600 |
| H | -0.11929400 | 3.87755700  | -3.57231900 |
| C | 3.32458800  | 3.92227900  | -0.61910000 |
| H | 2.60329100  | 4.56592600  | -0.10251600 |
| H | 4.20590300  | 3.80638700  | 0.01323700  |
| H | 3.61387900  | 4.39950500  | -1.56013100 |
| C | 2.76330700  | -1.92451000 | -2.67754600 |
| H | 2.23396500  | -1.68851000 | -3.60020900 |
| H | 3.66611200  | -2.48524300 | -2.91427200 |
| H | 2.11263600  | -2.51037600 | -2.03281200 |
| H | 2.22643300  | -0.02961500 | -1.90950600 |

**M1-N''**

B3LYP/6-311+G(d,p)-CPCM(mesitylene): E = -3437.311008 Hartrees; G = -3437.413843 Hartrees

M06-2X/6-311++G(d,p)-CPCM(mesitylene): single-point energy = -3436.9197406 Hartrees

|   |             |             |             |
|---|-------------|-------------|-------------|
| C | -1.66961600 | 7.89276500  | -0.24229100 |
| C | -2.71075500 | 6.96762600  | -0.19934800 |
| C | -2.43581900 | 5.60447700  | -0.28615000 |
| C | -1.12073600 | 5.14292600  | -0.41360500 |
| C | -0.08096000 | 6.08160400  | -0.44166400 |
| C | -0.35464400 | 7.44570000  | -0.36248400 |
| C | -0.86819700 | 3.64785300  | -0.50476000 |
| C | 0.16390200  | 3.16362400  | 0.55398300  |
| N | -0.51748700 | 3.18308700  | -1.92287800 |
| N | 0.61896000  | 1.79925100  | 0.29715300  |
| C | -0.43569700 | 3.30680600  | 1.95270900  |
| C | -1.52210200 | 2.51977100  | 2.35166500  |
| C | -2.05908800 | 2.64894000  | 3.63010300  |
| C | -1.51380000 | 3.56743100  | 4.52809200  |
| C | -0.42788500 | 4.34982300  | 4.14118000  |
| C | 0.10845900  | 4.21834900  | 2.86000400  |
| C | 0.85715200  | 3.50550400  | -2.40162200 |
| C | 1.89909200  | 1.38946800  | 0.47483900  |
| N | 2.01495300  | 0.01943200  | 0.41903200  |
| S | 3.19600700  | 2.43939300  | 0.75216300  |
| C | 3.17866300  | -0.76162400 | 0.32351800  |
| C | 3.19664200  | -1.99413400 | 0.98640600  |
| C | 4.30367300  | -2.83084200 | 0.87506700  |
| C | 5.40917500  | -2.46250200 | 0.11293200  |
| C | 5.37871300  | -1.23604100 | -0.54700100 |
| C | 4.27739300  | -0.38968600 | -0.45764000 |
| C | 6.52674100  | -0.83433500 | -1.43400600 |
| F | 6.27703100  | -1.12055400 | -2.74086300 |
| F | 7.67527500  | -1.47063000 | -1.11593300 |
| F | 6.77840200  | 0.49287900  | -1.37885900 |
| C | 4.28112000  | -4.17236000 | 1.55710300  |
| F | 3.60262800  | -4.14406600 | 2.72617400  |
| F | 3.68139700  | -5.11935300 | 0.78830600  |
| F | 5.52313800  | -4.63138700 | 1.82977300  |
| C | -7.10983700 | -3.85833900 | 0.30606100  |
| C | -7.01339100 | -4.96687900 | -0.54157300 |
| C | -5.77525700 | -5.48123400 | -0.93916000 |
| C | -4.63850100 | -4.85331800 | -0.46022500 |
| C | -4.71099000 | -3.72959000 | 0.39942500  |
| C | -5.96192900 | -3.23055100 | 0.78132500  |
| N | -3.30180600 | -5.16836700 | -0.70628800 |
| C | -2.44765500 | -4.31569900 | -0.04583200 |
| C | -3.35434100 | -3.32215400 | 0.67747800  |

|   |             |             |             |
|---|-------------|-------------|-------------|
| O | -1.23948100 | -4.37008200 | -0.02120100 |
| C | -2.85538100 | -2.28011800 | 1.39963400  |
| C | -1.46234400 | -1.97543700 | 1.47056600  |
| N | -0.36663200 | -1.62260200 | 1.55918500  |
| C | -3.69801500 | -1.37388500 | 2.10931700  |
| N | -4.37023400 | -0.64214700 | 2.69957100  |
| H | -1.87974100 | 8.95396300  | -0.17432300 |
| H | -3.73576600 | 7.30401500  | -0.09455000 |
| H | -3.25219500 | 4.89138000  | -0.24431100 |
| H | 0.95151300  | 5.76106300  | -0.51076200 |
| H | 0.46220600  | 8.15782500  | -0.38537900 |
| H | -1.95115000 | 1.79152300  | 1.67113700  |
| H | -2.89932500 | 2.02995100  | 3.92350200  |
| H | -1.93013000 | 3.66713200  | 5.52414000  |
| H | 0.00744500  | 5.05929700  | 4.83590200  |
| H | 0.96005300  | 4.82279400  | 2.56841400  |
| H | 2.34746800  | -2.28668200 | 1.59103600  |
| H | 6.27267000  | -3.10831500 | 0.04055100  |
| H | 4.27083900  | 0.55309300  | -0.98292200 |
| H | -8.08440100 | -3.48453400 | 0.59360300  |
| H | -7.91871600 | -5.44107200 | -0.90258200 |
| H | -5.71138800 | -6.33795400 | -1.59844900 |
| H | -6.04226600 | -2.37236600 | 1.43461800  |
| H | -2.97299600 | -5.94420700 | -1.26157100 |
| H | 1.17564700  | -0.50171500 | 0.66712700  |
| C | -1.53752000 | 3.62941700  | -2.91817400 |
| H | -1.52446000 | 4.71365900  | -3.00892000 |
| H | -1.29507000 | 3.17034500  | -3.87507000 |
| H | -2.51954300 | 3.28592100  | -2.59884900 |
| H | 1.59645400  | 3.19935500  | -1.66539600 |
| H | 1.02439000  | 2.95616000  | -3.32759900 |
| H | 0.94012700  | 4.57389700  | -2.59605200 |
| H | -1.81282300 | 3.13406000  | -0.31933300 |
| H | -0.04190800 | 1.14280700  | -0.14182700 |
| H | 1.05417300  | 3.79017500  | 0.50704500  |
| P | -2.40929700 | -0.10581600 | -1.66085100 |
| O | -1.95907900 | -1.70642800 | -1.96377600 |
| O | -1.02556500 | 0.65802500  | -1.61450400 |
| O | -3.07961700 | 0.35305300  | -3.14636800 |
| C | -0.71859800 | -2.10568500 | -2.56548100 |
| H | -0.38756400 | -3.01789800 | -2.06704200 |
| H | -0.86313500 | -2.30849000 | -3.63126800 |
| H | 0.04029700  | -1.32985000 | -2.44493900 |
| C | -2.40644300 | 0.19638600  | -4.39810400 |

|   |             |             |             |
|---|-------------|-------------|-------------|
| H | -2.89112500 | 0.85573600  | -5.12123500 |
| H | -1.34746600 | 0.46372400  | -4.32412400 |
| H | -2.48919200 | -0.83528400 | -4.75352600 |
| H | -0.65210300 | 2.10397800  | -1.87363300 |

**TS<sub>P-C'</sub>**

B3LYP/6-31+G(d,p)-CPCM(mesitylene): E = -3436.656272 Hartrees; G = -3436.754720

Hartrees

M06-2X/6-311++G(d,p)-CPCM(mesitylene): single-point energy = -3436.9227280 Hartrees

|   |             |             |             |
|---|-------------|-------------|-------------|
| C | 7.75591900  | -1.69925000 | -1.05733400 |
| C | 7.41434300  | -0.51669700 | -0.39642000 |
| C | 6.07101000  | -0.18939600 | -0.19802800 |
| C | 5.04872200  | -1.03464400 | -0.65623500 |
| C | 5.40439900  | -2.22808500 | -1.30561400 |
| C | 6.74714600  | -2.55493700 | -1.50869600 |
| C | 3.60307700  | -0.63641400 | -0.41156700 |
| C | 2.74572700  | -1.77422500 | 0.20282600  |
| N | 2.93518100  | -0.05569200 | -1.67050900 |
| N | 1.35723400  | -1.33235600 | 0.32946100  |
| C | 3.31241400  | -2.25028400 | 1.54049600  |
| C | 3.49525900  | -1.36839200 | 2.61665800  |
| C | 3.97458900  | -1.83963200 | 3.84120100  |
| C | 4.27535900  | -3.19520800 | 4.00772400  |
| C | 4.09222300  | -4.07907100 | 2.94146100  |
| C | 3.61198400  | -3.60791500 | 1.71609700  |
| C | 2.71565500  | -1.01379400 | -2.79868900 |
| C | 0.27186500  | -2.09897800 | 0.03728400  |
| N | -0.89375800 | -1.54724200 | 0.49573200  |
| S | 0.36577900  | -3.57977000 | -0.78143200 |
| C | -2.22165500 | -1.95370700 | 0.25902100  |
| C | -3.13809100 | -1.81998200 | 1.30659700  |
| C | -4.48865900 | -2.12623000 | 1.10462600  |
| C | -4.93796000 | -2.59075700 | -0.12764900 |
| C | -4.01125300 | -2.72647700 | -1.16908000 |
| C | -2.66811300 | -2.40639300 | -0.99379800 |
| C | -4.51135800 | -3.20522200 | -2.50795400 |
| F | -3.53062800 | -3.30223300 | -3.43317700 |
| F | -5.45650300 | -2.36862400 | -3.01987700 |
| F | -5.09845700 | -4.42849300 | -2.41989400 |
| C | -5.43986100 | -1.97207000 | 2.26196600  |
| F | -5.18271000 | -2.86372300 | 3.25577000  |
| F | -5.34589400 | -0.73677600 | 2.82954800  |
| F | -6.73241300 | -2.14371600 | 1.90386400  |
| C | -2.64768500 | 6.28262500  | 0.60608600  |

|   |             |             |             |
|---|-------------|-------------|-------------|
| C | -3.78736700 | 5.52817800  | 0.91041300  |
| C | -3.69132300 | 4.16440800  | 1.21537200  |
| C | -2.42531700 | 3.59455600  | 1.20036400  |
| C | -1.26400600 | 4.32993800  | 0.88165000  |
| C | -1.37944100 | 5.69091800  | 0.58820300  |
| N | -2.06453100 | 2.27317000  | 1.48686800  |
| C | -0.71183400 | 2.07607700  | 1.40179400  |
| C | -0.11865900 | 3.40057600  | 0.96176700  |
| O | -0.12551800 | 1.02375300  | 1.67491900  |
| C | 1.21852000  | 3.74483900  | 1.24190100  |
| C | 2.22172900  | 2.77956600  | 1.51150400  |
| N | 3.10226300  | 2.03513400  | 1.70357200  |
| C | 1.69132500  | 5.07585300  | 1.10400500  |
| N | 2.09105100  | 6.16765400  | 0.98536600  |
| H | 8.79934800  | -1.95765900 | -1.21104000 |
| H | 8.19000700  | 0.14873500  | -0.02970700 |
| H | 5.81373900  | 0.72536100  | 0.32855100  |
| H | 4.64208800  | -2.92151100 | -1.64616900 |
| H | 7.00286900  | -3.48282800 | -2.01138000 |
| H | 3.27029200  | -0.31089800 | 2.51027200  |
| H | 4.11321000  | -1.14500400 | 4.66458900  |
| H | 4.64735700  | -3.55865300 | 4.96123200  |
| H | 4.31866200  | -5.13456000 | 3.06107300  |
| H | 3.46145600  | -4.30219700 | 0.89446700  |
| H | -2.79274400 | -1.48512500 | 2.27979700  |
| H | -5.98196700 | -2.83661900 | -0.27905400 |
| H | -1.97059800 | -2.49758400 | -1.81346300 |
| H | -2.74560700 | 7.33946400  | 0.38021800  |
| H | -4.76260200 | 6.00516100  | 0.91634500  |
| H | -4.57131300 | 3.57872300  | 1.46078400  |
| H | -0.50820300 | 6.28865400  | 0.35048300  |
| H | -2.70884100 | 1.53960000  | 1.74781700  |
| H | -0.79200900 | -0.70568000 | 1.06820500  |
| C | 3.64974700  | 1.17030500  | -2.15383800 |
| H | 4.61079000  | 0.88942200  | -2.58359100 |
| H | 3.01586200  | 1.65417300  | -2.89634900 |
| H | 3.79544100  | 1.84705700  | -1.31199600 |
| H | 2.13537000  | -1.86763400 | -2.44895700 |
| H | 2.14710700  | -0.48745400 | -3.56562400 |
| H | 3.67606200  | -1.33427900 | -3.20084000 |
| H | 3.59439000  | 0.21163100  | 0.27846900  |
| H | 1.18706500  | -0.46525800 | 0.83700900  |
| H | 2.71973300  | -2.63191300 | -0.47049000 |
| P | -0.14288200 | 2.40857400  | -1.42385200 |

|   |             |            |             |
|---|-------------|------------|-------------|
| O | -1.59674600 | 2.49816100 | -2.20060800 |
| O | 0.47750100  | 1.01984700 | -1.58547700 |
| O | 0.85017400  | 3.38897500 | -2.33624900 |
| H | 1.96913500  | 0.29214800 | -1.41687500 |
| C | -1.78649400 | 1.87290800 | -3.49153200 |
| H | -1.56096600 | 0.80501700 | -3.43523400 |
| H | -2.83576100 | 2.01947000 | -3.75207600 |
| H | -1.14982800 | 2.34564800 | -4.24593500 |
| C | 0.53194200  | 4.77244800 | -2.57846000 |
| H | -0.53389600 | 4.90437700 | -2.78752600 |
| H | 0.82334800  | 5.39115600 | -1.72516800 |
| H | 1.11257500  | 5.07566100 | -3.45208000 |

### TS<sub>Enantio'</sub>

B3LYP/6-31+G(d,p)-CPCM(mesitylene): E = -3436.655206 Hartrees; G = -3436.756075 Hartrees

M06-2X/6-311++G(d,p)-CPCM(mesitylene): single-point energy = -3436.9189517 Hartrees

|   |             |             |             |
|---|-------------|-------------|-------------|
| C | -4.76522900 | 5.89544400  | -0.85323500 |
| C | -5.19461500 | 4.73185000  | -0.21008700 |
| C | -4.33200500 | 3.63959900  | -0.09333700 |
| C | -3.03018500 | 3.68855700  | -0.61399300 |
| C | -2.60500100 | 4.86905800  | -1.24496300 |
| C | -3.46760600 | 5.96094900  | -1.36820600 |
| C | -2.12830000 | 2.47420600  | -0.45855400 |
| C | -0.75544600 | 2.83153800  | 0.17026700  |
| N | -1.97131400 | 1.68802300  | -1.77105400 |
| N | 0.13492700  | 1.66957700  | 0.17656600  |
| C | -0.93008200 | 3.41428100  | 1.57269600  |
| C | -1.53870700 | 2.67717100  | 2.60049600  |
| C | -1.65362300 | 3.21798600  | 3.88321500  |
| C | -1.16384500 | 4.49923500  | 4.15582100  |
| C | -0.55335500 | 5.23638200  | 3.13826100  |
| C | -0.43659300 | 4.69474600  | 1.85481800  |
| C | -1.11006000 | 2.31172900  | -2.82335900 |
| C | 1.47325500  | 1.73478100  | -0.09159000 |
| N | 2.15502300  | 0.64687600  | 0.37991000  |
| S | 2.18927200  | 3.03215900  | -0.91281100 |
| C | 3.49692600  | 0.27436100  | 0.17038700  |
| C | 4.16175800  | -0.36149900 | 1.22778600  |
| C | 5.47324000  | -0.80912300 | 1.06219000  |
| C | 6.14731700  | -0.62279400 | -0.14501500 |
| C | 5.47286600  | 0.00623000  | -1.19433200 |
| C | 4.15648500  | 0.44625000  | -1.05449500 |
| C | 6.15790900  | 0.14537200  | -2.52955500 |

|   |             |             |             |
|---|-------------|-------------|-------------|
| F | 5.98461000  | -0.96354900 | -3.30470900 |
| F | 7.49768200  | 0.31670300  | -2.40431400 |
| F | 5.68739600  | 1.19240100  | -3.24817900 |
| C | 6.19133600  | -1.43841400 | 2.22776200  |
| F | 6.82254300  | -0.50637700 | 2.99616800  |
| F | 5.34876200  | -2.10765400 | 3.05144700  |
| F | 7.14487800  | -2.31675900 | 1.83096700  |
| C | -4.57196000 | -5.91439200 | 0.46846400  |
| C | -5.81260900 | -5.26755500 | 0.41463300  |
| C | -5.91218500 | -3.87617200 | 0.55606800  |
| C | -4.73469400 | -3.16671800 | 0.75340800  |
| C | -3.47237600 | -3.79898200 | 0.80460500  |
| C | -3.39223600 | -5.18560900 | 0.66165100  |
| N | -4.56380000 | -1.78824600 | 0.91876300  |
| C | -3.24320400 | -1.44729200 | 1.10575600  |
| C | -2.46381600 | -2.74676400 | 1.01672800  |
| O | -2.82356300 | -0.31571900 | 1.33345200  |
| C | -1.21065600 | -2.89671900 | 1.63036500  |
| C | -0.38553200 | -1.79053100 | 1.95202300  |
| N | 0.35328300  | -0.92160900 | 2.20626400  |
| C | -0.61275700 | -4.17086400 | 1.82997400  |
| N | -0.11306300 | -5.21004500 | 2.01266600  |
| H | -5.43214100 | 6.74742800  | -0.94479400 |
| H | -6.19643600 | 4.67445500  | 0.20483300  |
| H | -4.66937500 | 2.74225800  | 0.41815400  |
| H | -1.59543100 | 4.95653900  | -1.63367200 |
| H | -3.12022800 | 6.86540500  | -1.85840000 |
| H | -1.91921400 | 1.67719600  | 2.41175300  |
| H | -2.12345600 | 2.63516600  | 4.67017500  |
| H | -1.25351800 | 4.91658300  | 5.15448000  |
| H | -0.16415800 | 6.22985300  | 3.34100200  |
| H | 0.04904200  | 5.26820100  | 1.07048600  |
| H | 3.65222400  | -0.50253400 | 2.17492500  |
| H | 7.16876100  | -0.96156300 | -0.26730100 |
| H | 3.64670400  | 0.91910200  | -1.88160400 |
| H | -4.52103500 | -6.99263600 | 0.35793000  |
| H | -6.71643600 | -5.85004100 | 0.26400400  |
| H | -6.87441400 | -3.37544800 | 0.51927100  |
| H | -2.43657400 | -5.69463300 | 0.69088300  |
| H | -5.30687500 | -1.10412500 | 0.94191000  |
| H | 1.65403900  | 0.06912000  | 1.06028100  |
| C | -3.30289200 | 1.31704500  | -2.34713600 |
| H | -3.79543600 | 2.20679500  | -2.73794000 |
| H | -3.13491200 | 0.58498300  | -3.13660900 |



|   |             |             |             |
|---|-------------|-------------|-------------|
| H | -3.91297800 | 0.86600300  | -1.56472600 |
| H | -0.13426300 | 2.56318400  | -2.40865100 |
| H | -0.98360100 | 1.57617800  | -3.61867300 |
| H | -1.59997400 | 3.20068100  | -3.22053900 |
| H | -2.62877200 | 1.75085100  | 0.19069700  |
| H | -0.18930000 | 0.85753600  | 0.69715800  |
| H | -0.25273100 | 3.58007200  | -0.44284300 |
| P | -1.87800200 | -2.12056900 | -1.43419800 |
| O | -0.86830500 | -3.40810400 | -1.63333400 |
| O | -1.08144900 | -0.81385300 | -1.54646500 |
| O | -2.80911700 | -2.14501000 | -2.83071900 |
| H | -1.52727100 | 0.74851400  | -1.53721300 |
| C | 0.22976000  | -3.36045600 | -2.57116300 |
| H | 0.83149900  | -4.25132100 | -2.38537200 |
| H | -0.14344800 | -3.37521200 | -3.60035200 |
| H | 0.83131400  | -2.46248100 | -2.41102300 |
| C | -3.57992700 | -3.31574300 | -3.15475200 |
| H | -4.09082400 | -3.10075700 | -4.09535300 |
| H | -2.93150200 | -4.18803100 | -3.28352600 |
| H | -4.32449000 | -3.52960800 | -2.38073000 |

### TS<sub>P-C</sub>''

B3LYP/6-311+G(d,p)-CPCM(mesitylene): E = -3437.308612 Hartrees; G = -3437.407013 Hartrees

M06-2X/6-311++G(d,p)-CPCM(mesitylene): single-point energy = -3436.9258074 Hartrees

|   |             |             |             |
|---|-------------|-------------|-------------|
| C | 7.76758800  | -1.60543900 | -1.05668500 |
| C | 7.41415600  | -0.42801500 | -0.40059700 |
| C | 6.07070400  | -0.11576500 | -0.20298800 |
| C | 5.06037100  | -0.97202500 | -0.65674200 |
| C | 5.42812700  | -2.16033500 | -1.30154700 |
| C | 6.77106100  | -2.47155300 | -1.50411000 |
| C | 3.61104100  | -0.59201600 | -0.41086900 |
| C | 2.77174100  | -1.74062400 | 0.20487900  |
| N | 2.93429900  | -0.02021800 | -1.66755400 |
| N | 1.37795400  | -1.32054700 | 0.33948200  |
| C | 3.35115700  | -2.21191100 | 1.53733700  |
| C | 3.53005000  | -1.33148500 | 2.61093800  |
| C | 4.02090600  | -1.79788300 | 3.82890200  |
| C | 4.33709200  | -3.14678100 | 3.99090700  |
| C | 4.15784200  | -4.02909600 | 2.92746700  |
| C | 3.66547900  | -3.56322000 | 1.70887500  |
| C | 2.73202300  | -0.97914200 | -2.79607400 |
| C | 0.30517700  | -2.09994200 | 0.04245100  |
| N | -0.86740700 | -1.56766200 | 0.50333700  |

|   |             |             |             |
|---|-------------|-------------|-------------|
| S | 0.42080400  | -3.57212100 | -0.78287800 |
| C | -2.18941900 | -1.98689100 | 0.26657300  |
| C | -3.10918600 | -1.84506800 | 1.30733800  |
| C | -4.45246000 | -2.16452400 | 1.10738200  |
| C | -4.89488700 | -2.65022900 | -0.11636600 |
| C | -3.96691400 | -2.79352100 | -1.14979900 |
| C | -2.62931400 | -2.46021400 | -0.97631100 |
| C | -4.45185100 | -3.24833700 | -2.50129800 |
| F | -3.45985500 | -3.73786500 | -3.27235100 |
| F | -5.01873200 | -2.22743200 | -3.19926800 |
| F | -5.39646400 | -4.21202300 | -2.40425900 |
| C | -5.40653800 | -2.01109000 | 2.26095000  |
| F | -5.18237500 | -2.93075100 | 3.23204800  |
| F | -5.28324600 | -0.79567300 | 2.85524400  |
| F | -6.69642000 | -2.13924000 | 1.89030200  |
| C | -2.73663000 | 6.23872300  | 0.58896900  |
| C | -3.86594600 | 5.47264000  | 0.88580600  |
| C | -3.75552500 | 4.11355300  | 1.19088400  |
| C | -2.48590200 | 3.55907900  | 1.18384300  |
| C | -1.33443600 | 4.30708800  | 0.87152400  |
| C | -1.46428600 | 5.66370200  | 0.57917700  |
| N | -2.11126800 | 2.24385800  | 1.47210400  |
| C | -0.75655700 | 2.06149700  | 1.39445900  |
| C | -0.17868100 | 3.39354300  | 0.95853500  |
| O | -0.16140700 | 1.02264400  | 1.66856300  |
| C | 1.14988800  | 3.75350100  | 1.24298300  |
| C | 2.15896500  | 2.80239000  | 1.52086100  |
| N | 3.03730500  | 2.06952100  | 1.71711500  |
| C | 1.60688200  | 5.08580700  | 1.10622900  |
| N | 1.99374600  | 6.17355300  | 0.98939900  |
| H | 8.81196600  | -1.85203000 | -1.20980800 |
| H | 8.18157900  | 0.24552000  | -0.03704500 |
| H | 5.80429500  | 0.79598000  | 0.32018000  |
| H | 4.67506400  | -2.86203700 | -1.63927700 |
| H | 7.03744700  | -3.39591700 | -2.00357600 |
| H | 3.29312100  | -0.27815200 | 2.50801400  |
| H | 4.15653100  | -1.10493800 | 4.65166300  |
| H | 4.71845300  | -3.50680500 | 4.93980800  |
| H | 4.39653600  | -5.08016900 | 3.04467900  |
| H | 3.51749800  | -4.25711400 | 0.88904000  |
| H | -2.76943800 | -1.49455500 | 2.27493500  |
| H | -5.93382400 | -2.90964400 | -0.26489100 |
| H | -1.92914100 | -2.56168600 | -1.79049100 |
| H | -2.84628400 | 7.29244100  | 0.36310600  |

|   |             |             |             |
|---|-------------|-------------|-------------|
| H | -4.84505600 | 5.93726200  | 0.88587900  |
| H | -4.62868000 | 3.51909100  | 1.43125300  |
| H | -0.60050600 | 6.27071300  | 0.34639200  |
| H | -2.74803600 | 1.50358400  | 1.72786800  |
| H | -0.77633800 | -0.73050000 | 1.08113100  |
| C | 3.62784700  | 1.21771900  | -2.14641700 |
| H | 4.59453200  | 0.95615400  | -2.57139000 |
| H | 2.98985400  | 1.68980700  | -2.89053700 |
| H | 3.75587700  | 1.89587900  | -1.30501600 |
| H | 2.16613300  | -1.84164400 | -2.44897200 |
| H | 2.15631700  | -0.46231200 | -3.56185400 |
| H | 3.69598400  | -1.28328100 | -3.19769200 |
| H | 3.59318300  | 0.25320100  | 0.27961900  |
| H | 1.19576700  | -0.45840000 | 0.84797300  |
| H | 2.75450800  | -2.59555800 | -0.46907900 |
| P | -0.18103800 | 2.39953800  | -1.41357600 |
| O | -1.62540900 | 2.44127000  | -2.20166200 |
| O | 0.47934400  | 1.03364000  | -1.56327200 |
| O | 0.78988200  | 3.40230900  | -2.31763900 |
| H | 1.96427300  | 0.31140100  | -1.41241100 |
| C | -1.81091800 | 1.79387000  | -3.48155100 |
| H | -1.57751000 | 0.73059000  | -3.40747000 |
| H | -2.85936600 | 1.92686600  | -3.74390900 |
| H | -1.17911300 | 2.25838800  | -4.24255800 |
| C | 0.45105400  | 4.77707700  | -2.57754200 |
| H | -0.62261600 | 4.89759400  | -2.73844400 |
| H | 0.77851900  | 5.41536900  | -1.75462700 |
| H | 0.98510700  | 5.06369100  | -3.48356200 |

**TS<sub>Enantio</sub>**

B3LYP/6-311+G(d,p)-CPCM(mesitylene): E = -3437.307550 Hartrees; G = -3437.408685 Hartrees

M06-2X/6-311++G(d,p)-CPCM(mesitylene): single-point energy = -3436.9218161 Hartrees

|   |             |            |             |
|---|-------------|------------|-------------|
| C | -4.77169600 | 5.89237600 | -0.83269500 |
| C | -5.20128900 | 4.72612100 | -0.20260500 |
| C | -4.34156400 | 3.63503900 | -0.09528100 |
| C | -3.04201000 | 3.68888000 | -0.61177800 |
| C | -2.61644100 | 4.87215300 | -1.22984300 |
| C | -3.47676900 | 5.96241700 | -1.34402600 |
| C | -2.13953200 | 2.47555000 | -0.46418600 |
| C | -0.77301600 | 2.83053700 | 0.17647700  |
| N | -1.97326600 | 1.70232100 | -1.78187200 |
| N | 0.12048600  | 1.67207100 | 0.18194800  |
| C | -0.95966700 | 3.40258000 | 1.58044500  |

|   |             |             |             |
|---|-------------|-------------|-------------|
| C | -1.56115600 | 2.65254600  | 2.59840600  |
| C | -1.68775100 | 3.18196100  | 3.88115000  |
| C | -1.21704400 | 4.46447400  | 4.16300400  |
| C | -0.61363200 | 5.21429800  | 3.15553800  |
| C | -0.48465100 | 4.68412100  | 1.87223300  |
| C | -1.10931400 | 2.33796300  | -2.82265000 |
| C | 1.45731900  | 1.74234100  | -0.08332500 |
| N | 2.14051700  | 0.65402700  | 0.38278800  |
| S | 2.17023700  | 3.04446700  | -0.89353600 |
| C | 3.48244500  | 0.28712500  | 0.17356600  |
| C | 4.14583400  | -0.35590000 | 1.22359600  |
| C | 5.45572500  | -0.79692700 | 1.05743900  |
| C | 6.13059300  | -0.59800900 | -0.14338000 |
| C | 5.45808700  | 0.03696600  | -1.18574600 |
| C | 4.14387400  | 0.47194900  | -1.04477300 |
| C | 6.14391500  | 0.18990200  | -2.51761500 |
| F | 5.96642700  | -0.90563600 | -3.30429500 |
| F | 7.48012100  | 0.35394900  | -2.38959600 |
| F | 5.67849800  | 1.24462900  | -3.22049200 |
| C | 6.17274500  | -1.43284600 | 2.21843200  |
| F | 6.80062100  | -0.50718700 | 2.99060200  |
| F | 5.33211000  | -2.10586900 | 3.03416000  |
| F | 7.12421200  | -2.30503300 | 1.81720600  |
| C | -4.52746900 | -5.93623800 | 0.44510900  |
| C | -5.76680000 | -5.29660800 | 0.37288300  |
| C | -5.87393100 | -3.90875600 | 0.50904300  |
| C | -4.70539000 | -3.19412800 | 0.71978300  |
| C | -3.44381800 | -3.81991300 | 0.78853200  |
| C | -3.35647200 | -5.20351700 | 0.65136900  |
| N | -4.54265800 | -1.81648600 | 0.88339200  |
| C | -3.22658200 | -1.46799300 | 1.08695200  |
| C | -2.44272700 | -2.76504800 | 1.01075200  |
| O | -2.81714300 | -0.34103900 | 1.31825400  |
| C | -1.19635100 | -2.90944200 | 1.63070700  |
| C | -0.37884900 | -1.80224800 | 1.95086600  |
| N | 0.34981600  | -0.93331600 | 2.19618900  |
| C | -0.59910400 | -4.17737400 | 1.84268700  |
| N | -0.10190600 | -5.20664200 | 2.03489700  |
| H | -5.43714400 | 6.74381400  | -0.91693000 |
| H | -6.20207100 | 4.66587500  | 0.20937000  |
| H | -4.67967700 | 2.73486700  | 0.40640000  |
| H | -1.60817500 | 4.96310200  | -1.61557000 |
| H | -3.13009500 | 6.87003200  | -1.82452000 |
| H | -1.92662800 | 1.65030300  | 2.40250100  |

|   |             |             |             |
|---|-------------|-------------|-------------|
| H | -2.15151300 | 2.58951600  | 4.66181600  |
| H | -1.31562300 | 4.87345100  | 5.16219600  |
| H | -0.23860500 | 6.20936300  | 3.36669700  |
| H | -0.00384300 | 5.26833700  | 1.09561200  |
| H | 3.63511600  | -0.50865000 | 2.16625100  |
| H | 7.15160800  | -0.93204000 | -0.26612700 |
| H | 3.63629400  | 0.95171800  | -1.86684700 |
| H | -4.47104100 | -7.01273300 | 0.33902500  |
| H | -6.66432000 | -5.88265100 | 0.21227300  |
| H | -6.83639000 | -3.41380300 | 0.45803000  |
| H | -2.40105100 | -5.70784400 | 0.69542500  |
| H | -5.28834000 | -1.13683700 | 0.89542700  |
| H | 1.64302200  | 0.07773900  | 1.06509500  |
| C | -3.29958400 | 1.33150400  | -2.36650900 |
| H | -3.79432000 | 2.22114400  | -2.75004600 |
| H | -3.12522900 | 0.60987200  | -3.16194000 |
| H | -3.91014800 | 0.86985800  | -1.59306000 |
| H | -0.13762800 | 2.58755300  | -2.40129600 |
| H | -0.97700200 | 1.61217700  | -3.62376800 |
| H | -1.59845400 | 3.22812800  | -3.21322700 |
| H | -2.64045300 | 1.74724000  | 0.17609700  |
| H | -0.20264800 | 0.85681200  | 0.69494700  |
| H | -0.26873300 | 3.58328300  | -0.42667600 |
| P | -1.85878800 | -2.12788900 | -1.43398000 |
| O | -0.80504400 | -3.37600300 | -1.61740600 |
| O | -1.10983600 | -0.80009100 | -1.55338400 |
| O | -2.78075300 | -2.19667700 | -2.83039000 |
| H | -1.52946400 | 0.76434500  | -1.55143200 |
| C | 0.32330300  | -3.30288100 | -2.51531000 |
| H | 0.91597300  | -4.19900300 | -2.33776300 |
| H | -0.01328900 | -3.28374000 | -3.55512500 |
| H | 0.92023500  | -2.41384400 | -2.30683500 |
| C | -3.50199000 | -3.39279000 | -3.17153400 |
| H | -4.01203900 | -3.19030600 | -4.11303800 |
| H | -2.81945800 | -4.23603900 | -3.30192500 |
| H | -4.24289600 | -3.64237700 | -2.40729500 |

**TS<sub>NH-CH'</sub>**

B3LYP/6-31+G(d,p)-CPCM(mesitylene): E = -3436.650829 Hartrees; G = -3436.748309 Hartrees

M06-2X/6-311++G(d,p)-CPCM(mesitylene): single-point energy = -3436.9375866 Hartrees

|   |            |             |             |
|---|------------|-------------|-------------|
| C | 7.16968600 | -3.12239200 | -0.74888300 |
| C | 7.00611500 | -2.16260800 | 0.25286500  |
| C | 5.78151300 | -1.50572700 | 0.39987400  |

|   |             |             |             |
|---|-------------|-------------|-------------|
| C | 4.69978100  | -1.79734200 | -0.44271200 |
| C | 4.87280400  | -2.77233500 | -1.43848900 |
| C | 6.09797600  | -3.42461200 | -1.59418200 |
| C | 3.37934300  | -1.05305100 | -0.24961200 |
| C | 2.23650600  | -2.08137400 | -0.01152700 |
| N | 3.09222600  | -0.02564600 | -1.34946200 |
| N | 0.94332500  | -1.42251900 | 0.11654100  |
| C | 2.54108800  | -2.93277000 | 1.22667700  |
| C | 2.51298800  | -2.36619100 | 2.50968700  |
| C | 2.78225500  | -3.14436600 | 3.63773700  |
| C | 3.07916600  | -4.50398000 | 3.49834600  |
| C | 3.09966600  | -5.07817000 | 2.22489500  |
| C | 2.83017100  | -4.29630200 | 1.09774100  |
| C | 2.35342200  | -0.53964400 | -2.53301500 |
| C | -0.24466400 | -2.02167000 | -0.14294200 |
| N | -1.29959300 | -1.33657900 | 0.41863200  |
| S | -0.39792800 | -3.45699300 | -1.02128500 |
| C | -2.68251200 | -1.48945800 | 0.23888000  |
| C | -3.51162300 | -1.13747400 | 1.31454600  |
| C | -4.89915100 | -1.21034800 | 1.18833600  |
| C | -5.48918800 | -1.64460400 | 0.00088200  |
| C | -4.65577000 | -1.99144700 | -1.06553800 |
| C | -3.26625800 | -1.91024300 | -0.96581100 |
| C | -5.27476400 | -2.39279900 | -2.38045400 |
| F | -4.49052400 | -3.23666400 | -3.08948600 |
| F | -5.50036900 | -1.30998300 | -3.18024600 |
| F | -6.47544500 | -3.00259100 | -2.21819000 |
| C | -5.76569300 | -0.77002900 | 2.33835000  |
| F | -6.00135700 | 0.57436900  | 2.30499800  |
| F | -6.97884100 | -1.37101000 | 2.33470600  |
| F | -5.19575100 | -1.02461700 | 3.54278100  |
| C | 0.67522700  | 6.72602000  | 0.53124900  |
| C | 0.38137500  | 6.75029700  | 1.89809500  |
| C | 0.22503600  | 5.56121700  | 2.62237300  |
| C | 0.37482900  | 4.36919300  | 1.92621800  |
| C | 0.66633900  | 4.32017900  | 0.55560800  |
| C | 0.81653100  | 5.50924300  | -0.15180000 |
| N | 0.27988700  | 3.05758700  | 2.42231300  |
| C | 0.50414300  | 2.11807800  | 1.47349900  |
| C | 0.77765500  | 2.85667700  | 0.12790700  |
| O | 0.49839000  | 0.90147800  | 1.67008600  |
| C | 2.19085200  | 2.44716200  | -0.44082300 |
| C | 3.21841300  | 2.64746600  | 0.56696300  |
| N | 4.03213900  | 2.71957500  | 1.39795700  |

|   |             |             |             |
|---|-------------|-------------|-------------|
| C | 2.50004200  | 3.19035800  | -1.64808600 |
| N | 2.72756100  | 3.72738900  | -2.65701300 |
| H | 8.12012600  | -3.63416500 | -0.86715400 |
| H | 7.82821000  | -1.92394100 | 0.92108400  |
| H | 5.66519400  | -0.76110500 | 1.18294600  |
| H | 4.05337200  | -3.03916300 | -2.09836200 |
| H | 6.21108000  | -4.17418000 | -2.37192800 |
| H | 2.27030200  | -1.31429200 | 2.63792000  |
| H | 2.75763700  | -2.68948600 | 4.62388000  |
| H | 3.28678600  | -5.11033700 | 4.37517000  |
| H | 3.31957900  | -6.13516900 | 2.10615100  |
| H | 2.83904600  | -4.75130600 | 0.11198000  |
| H | -3.06691600 | -0.82018700 | 2.25200100  |
| H | -6.56581800 | -1.71684500 | -0.08958700 |
| H | -2.63836700 | -2.17204500 | -1.80521100 |
| H | 0.79334800  | 7.65812700  | -0.01174900 |
| H | 0.27379400  | 7.70158200  | 2.40991600  |
| H | 0.00002400  | 5.57260600  | 3.68388700  |
| H | 1.03496500  | 5.50338500  | -1.21240600 |
| H | 0.09501300  | 2.80845500  | 3.38557800  |
| H | -1.03829100 | -0.60356400 | 1.07119200  |
| C | 4.36041200  | 0.60888500  | -1.81554500 |
| H | 4.99355700  | -0.11274700 | -2.33542800 |
| H | 4.11049700  | 1.41762600  | -2.50095900 |
| H | 4.90926800  | 1.01387700  | -0.96428200 |
| H | 1.39223300  | -0.94814300 | -2.23332900 |
| H | 2.17081000  | 0.30133800  | -3.20384600 |
| H | 2.94302200  | -1.29094200 | -3.06792600 |
| H | 3.48411000  | -0.44322500 | 0.65387500  |
| H | 0.91493900  | -0.53842300 | 0.62597500  |
| H | 2.16475000  | -2.75030300 | -0.87129600 |
| P | -0.57649800 | 2.37616400  | -1.07733300 |
| O | -1.83499100 | 2.57212000  | -0.09376800 |
| O | -0.40056300 | 1.04337400  | -1.71711300 |
| O | -0.71789800 | 3.59793100  | -2.11519800 |
| H | 2.44644900  | 1.09045300  | -0.84547800 |
| C | -3.19308700 | 2.50808300  | -0.59954400 |
| H | -3.35499400 | 3.30149200  | -1.33292300 |
| H | -3.38640600 | 1.52928000  | -1.04402700 |
| H | -3.83968000 | 2.65972400  | 0.26382400  |
| C | -0.57439000 | 3.43459900  | -3.55295600 |
| H | 0.42154400  | 3.77157400  | -3.84334200 |
| H | -0.71987700 | 2.39123600  | -3.83629300 |
| H | -1.34011900 | 4.06371800  | -4.00805600 |

**TS<sub>OH-CH'</sub>**

B3LYP/6-31+G(d,p)-CPCM(mesitylene): E = -4084.077793 Hartrees; G = -4084.190884 Hartrees

M06-2X/6-311++G(d,p)-CPCM(mesitylene): single-point energy = -4084.4042665 Hartrees

|   |             |             |             |
|---|-------------|-------------|-------------|
| C | 7.97717300  | -2.35252700 | -0.06293700 |
| C | 7.61495900  | -1.00692300 | 0.03787900  |
| C | 6.27237700  | -0.63547800 | -0.06194200 |
| C | 5.27219400  | -1.59940500 | -0.26429400 |
| C | 5.64658000  | -2.95037300 | -0.34939900 |
| C | 6.98950100  | -3.32265200 | -0.25456500 |
| C | 3.82760500  | -1.14198200 | -0.35875100 |
| C | 2.87104700  | -1.94550300 | 0.55898600  |
| N | 3.31475100  | -1.11110400 | -1.81616400 |
| N | 1.47132400  | -1.60792300 | 0.27689200  |
| C | 3.22002700  | -1.72474400 | 2.02997600  |
| C | 3.20006900  | -0.44326900 | 2.60220100  |
| C | 3.49048600  | -0.26981500 | 3.95717100  |
| C | 3.80547500  | -1.37340100 | 4.75613900  |
| C | 3.82322500  | -2.65246900 | 4.19444700  |
| C | 3.52990700  | -2.82606900 | 2.83886400  |
| C | 3.11327100  | -2.44423800 | -2.46829900 |
| C | 0.46025000  | -2.53120300 | 0.28858800  |
| N | -0.77178100 | -1.94993900 | 0.42916000  |
| S | 0.72710900  | -4.19517400 | 0.14132400  |
| C | -2.05927300 | -2.52028000 | 0.40477800  |
| C | -3.04511300 | -1.88639000 | 1.17859300  |
| C | -4.35986400 | -2.34727000 | 1.15561800  |
| C | -4.71987000 | -3.45306200 | 0.38109900  |
| C | -3.73486500 | -4.07298400 | -0.38707900 |
| C | -2.41387100 | -3.61725100 | -0.39083500 |
| C | -4.07836700 | -5.28136400 | -1.22098300 |
| F | -3.47065400 | -5.25250200 | -2.43589800 |
| F | -5.40896000 | -5.39477500 | -1.44684500 |
| F | -3.68344800 | -6.43713000 | -0.62279100 |
| C | -5.39966600 | -1.68024500 | 2.01929700  |
| F | -5.09730300 | -0.38533300 | 2.28299300  |
| F | -6.62623100 | -1.69335500 | 1.44041300  |
| F | -5.53448900 | -2.30061500 | 3.22252200  |
| C | -2.95831400 | 5.17878700  | -2.56083100 |
| C | -3.91622400 | 4.91097800  | -1.57804100 |
| C | -3.69447900 | 3.93177200  | -0.60105500 |
| C | -2.48475800 | 3.25112300  | -0.64219600 |
| C | -1.50862900 | 3.51204400  | -1.61452400 |



|   |             |             |             |
|---|-------------|-------------|-------------|
| C | -1.74464200 | 4.47707100  | -2.58787300 |
| N | -2.05141300 | 2.21106700  | 0.20065200  |
| C | -0.81446100 | 1.77004500  | -0.13363200 |
| C | -0.31095800 | 2.60877500  | -1.34747600 |
| O | -0.18304000 | 0.88435700  | 0.44538000  |
| C | 0.93599800  | 3.43005800  | -0.83165400 |
| C | 1.28318500  | 4.58120500  | -1.64836700 |
| N | 1.57114200  | 5.53504800  | -2.24903500 |
| C | 2.13182000  | 2.65768300  | -0.54540800 |
| N | 3.11376100  | 2.10249900  | -0.26043700 |
| H | 9.01988100  | -2.64497500 | 0.01638100  |
| H | 8.37302600  | -0.24674400 | 0.19974900  |
| H | 5.99701800  | 0.41157000  | 0.02858800  |
| H | 4.89842000  | -3.72670800 | -0.47417000 |
| H | 7.26077700  | -4.37194700 | -0.32062300 |
| H | 2.95453900  | 0.42993700  | 2.00329900  |
| H | 3.46676800  | 0.72730600  | 4.38605600  |
| H | 4.03105900  | -1.23618800 | 5.80952300  |
| H | 4.06124200  | -3.51598000 | 4.80862100  |
| H | 3.53565800  | -3.82374700 | 2.40948600  |
| H | -2.77749000 | -1.03586300 | 1.79652100  |
| H | -5.74133700 | -3.81194200 | 0.36766300  |
| H | -1.66898600 | -4.10432200 | -1.00342900 |
| H | -3.15153500 | 5.93904100  | -3.31065500 |
| H | -4.84951500 | 5.46558900  | -1.57036200 |
| H | -4.43769500 | 3.71492900  | 0.15876800  |
| H | -1.00570200 | 4.68906900  | -3.35076800 |
| H | -2.39192600 | 2.08119300  | 1.15157600  |
| H | -0.76023600 | -0.95289100 | 0.65154700  |
| C | 4.16570100  | -0.22546100 | -2.67840500 |
| H | 5.14308000  | -0.68668000 | -2.81229900 |
| H | 3.66145200  | -0.11173400 | -3.63734200 |
| H | 4.26056700  | 0.74538000  | -2.19389200 |
| H | 2.46158300  | -3.06543100 | -1.85398100 |
| H | 2.64255200  | -2.27003700 | -3.43635000 |
| H | 4.08124000  | -2.92324000 | -2.61024900 |
| H | 3.78163000  | -0.08803200 | -0.07909500 |
| H | 1.19626300  | -0.63706600 | 0.42528200  |
| H | 2.96065700  | -3.01136000 | 0.34865400  |
| P | 0.04545100  | 1.47385800  | -2.77764100 |
| O | -1.38428000 | 0.92900600  | -3.27668200 |
| O | 1.03747000  | 0.37743500  | -2.52828900 |
| O | 0.45555300  | 2.55095900  | -3.88621500 |
| C | -1.81185100 | -0.44802300 | -3.11788300 |

|   |             |             |             |
|---|-------------|-------------|-------------|
| H | -2.56113100 | -0.61857300 | -3.89061900 |
| H | -0.96931400 | -1.12848400 | -3.24732400 |
| H | -2.25832600 | -0.58230600 | -2.13071900 |
| C | 0.72929900  | 2.17207700  | -5.25851800 |
| H | 1.07299100  | 3.07991800  | -5.75238500 |
| H | 1.50958900  | 1.40845400  | -5.29374800 |
| H | -0.18537200 | 1.80799700  | -5.73193500 |
| H | 2.38545900  | -0.64865900 | -1.79596600 |
| P | -0.03337100 | 3.54140300  | 2.82891000  |
| O | -1.72422600 | 3.27831700  | 3.01824900  |
| O | 0.06588000  | 4.35989400  | 1.47575600  |
| O | 0.22475800  | 4.71873100  | 4.01174500  |
| H | 0.56690900  | 3.87995000  | 0.29328900  |
| C | -2.63442100 | 4.38047800  | 3.12518100  |
| H | -3.65096200 | 3.97647700  | 3.09099300  |
| H | -2.49637000 | 4.90143400  | 4.07907100  |
| H | -2.50158400 | 5.09088600  | 2.30101300  |
| C | 0.23774000  | 6.12913100  | 3.75597300  |
| H | 1.01217400  | 6.57105500  | 4.39017600  |
| H | 0.45738700  | 6.33538500  | 2.70482100  |
| H | -0.73059800 | 6.57437000  | 4.01495900  |

### TSa'

B3LYP/6-31+G(d,p)-CPCM(dichloromethane): E = -3705.338474 Hartrees; G = -3705.446470 Hartrees

M06-2X/6-311++G(d,p)-CPCM(dichloromethane): single-point energy = -3705.7122954 Hartrees

|   |            |             |             |
|---|------------|-------------|-------------|
| C | 6.72557800 | -1.04421500 | 3.16683400  |
| C | 5.35938500 | -1.32642600 | 2.90967500  |
| C | 4.86403600 | -1.20418300 | 1.56323200  |
| C | 5.76720800 | -0.80448900 | 0.54688000  |
| C | 7.09776900 | -0.54089600 | 0.83247000  |
| C | 7.58548100 | -0.66214700 | 2.16056800  |
| C | 3.47766300 | -1.51009000 | 1.34889600  |
| C | 2.72295400 | -1.90036600 | 2.43755600  |
| C | 3.31149300 | -1.97819600 | 3.72249100  |
| N | 4.57873700 | -1.70540500 | 3.96520600  |
| C | 2.81728700 | -1.40650100 | -0.03246100 |
| C | 2.31404700 | -2.79929000 | -0.47635400 |
| N | 1.53013200 | -2.73346500 | -1.78029400 |
| C | 2.35784400 | -2.25238200 | -2.94924900 |
| C | 3.60812300 | -3.15331100 | -3.07487900 |
| C | 3.46046400 | -4.35554400 | -2.11994500 |
| C | 3.45902200 | -3.83283500 | -0.66940600 |
| C | 2.12451400 | -5.07635500 | -2.45405400 |

|   |             |             |             |
|---|-------------|-------------|-------------|
| C | 0.97026000  | -4.10882000 | -2.07436500 |
| C | 1.96241000  | -6.41570000 | -1.78178700 |
| C | 1.85410600  | -7.57674100 | -2.43529200 |
| O | 7.87618300  | -0.16501900 | -0.22383800 |
| C | 9.26041700  | 0.12562000  | -0.00165200 |
| N | 1.73146000  | -0.42127300 | -0.03155900 |
| C | 1.85534700  | 0.85100300  | -0.51445300 |
| S | 3.14096000  | 1.34475800  | -1.50776500 |
| N | 0.81737200  | 1.66376300  | -0.16426500 |
| C | 0.67700800  | 3.04535600  | -0.44353500 |
| C | -0.55482000 | 3.51223200  | -0.90869800 |
| C | -0.73920700 | 4.88462000  | -1.12054200 |
| C | 0.28935500  | 5.79349400  | -0.88804300 |
| C | 1.51536700  | 5.31142900  | -0.41540300 |
| C | 1.71491500  | 3.95256500  | -0.18368400 |
| C | -2.08441600 | 5.36423300  | -1.59758100 |
| F | -2.49311000 | 4.71336400  | -2.71870100 |
| C | 2.64166100  | 6.28414900  | -0.18401500 |
| F | 2.20319800  | 7.46568000  | 0.32225600  |
| F | -3.05606400 | 5.15641900  | -0.66389500 |
| F | -2.09924800 | 6.68737200  | -1.88339100 |
| F | 3.57606400  | 5.80811400  | 0.67353300  |
| F | 3.29686100  | 6.58668400  | -1.34117600 |
| H | 2.70251700  | -2.28215600 | 4.57140200  |
| H | 1.67385800  | -2.16260200 | 2.33438600  |
| H | 0.02663600  | 1.22313200  | 0.31500000  |
| H | 7.07939100  | -1.14074400 | 4.18832900  |
| H | 0.94740500  | -0.59845400 | 0.59393600  |
| H | 3.54034300  | -1.03274900 | -0.75418300 |
| H | -1.35894300 | 2.80974200  | -1.10645600 |
| H | 2.59839100  | -1.20210200 | -2.77886000 |
| H | 2.65842700  | 3.59529400  | 0.20476400  |
| H | 4.42738200  | -3.37028300 | -0.45909200 |
| H | 0.14066300  | 6.85201100  | -1.06066900 |
| H | 1.70705700  | -2.31266400 | -3.82324100 |
| H | 8.62313700  | -0.45589500 | 2.39197300  |
| H | 5.44270500  | -0.67347300 | -0.47798300 |
| H | 1.58142000  | -3.15701700 | 0.24969400  |
| H | 3.34208400  | -4.65125200 | 0.04493200  |
| H | 3.71411700  | -3.49529800 | -4.10815600 |
| H | 4.29454700  | -5.04802200 | -2.26002700 |
| H | 0.24238100  | -3.99368400 | -2.87880700 |
| H | 0.44076500  | -4.42397700 | -1.17315900 |
| H | 2.10421300  | -5.24166600 | -3.53693700 |

|   |             |             |             |
|---|-------------|-------------|-------------|
| H | 4.51190000  | -2.58897800 | -2.82535100 |
| H | 9.66201400  | 0.39814200  | -0.97753800 |
| H | 9.38322700  | 0.96594400  | 0.69040700  |
| H | 9.79339900  | -0.75227100 | 0.37951400  |
| H | 1.93152100  | -6.41697300 | -0.69192200 |
| H | 1.74655700  | -8.51752500 | -1.90360700 |
| H | 1.86919300  | -7.62352300 | -3.52211500 |
| C | -6.81430000 | -0.48618800 | 2.75103700  |
| C | -6.54536400 | 0.79430600  | 3.24160800  |
| C | -5.27624400 | 1.37369400  | 3.09111100  |
| C | -4.30710800 | 0.62740100  | 2.43320200  |
| C | -4.55755500 | -0.66106100 | 1.92483600  |
| C | -5.82050200 | -1.22451000 | 2.08989100  |
| N | -2.96909900 | 0.98488000  | 2.18303000  |
| C | -2.30117500 | -0.02715600 | 1.55126300  |
| C | -3.30055100 | -1.15467100 | 1.29519800  |
| O | -1.10001400 | -0.00873200 | 1.25643000  |
| C | -2.83440300 | -2.50107300 | 1.57006700  |
| C | -1.48205700 | -2.89810600 | 1.50222700  |
| N | -0.38491100 | -3.31183600 | 1.49192900  |
| C | -3.71241400 | -3.52706900 | 1.98714400  |
| N | -4.40576000 | -4.39516300 | 2.36150700  |
| H | -7.80089500 | -0.91886700 | 2.88283300  |
| H | -7.32491400 | 1.35177500  | 3.75189600  |
| H | -5.06630800 | 2.36484100  | 3.47805300  |
| H | -6.04335200 | -2.21632500 | 1.71886900  |
| H | 0.70762400  | -2.10604100 | -1.66355500 |
| C | -5.98546000 | -1.75997300 | -1.15274500 |
| C | -4.59639700 | -1.99609500 | -1.09685700 |
| C | -4.14069700 | -3.30272200 | -1.36982900 |
| C | -5.03289300 | -4.32891500 | -1.68462400 |
| C | -6.40568500 | -4.07965400 | -1.73862100 |
| C | -6.87203400 | -2.78885300 | -1.47429700 |
| H | -6.37670300 | -0.77450000 | -0.94929100 |
| H | -3.08099700 | -3.52386900 | -1.34659600 |
| H | -4.64819300 | -5.32387000 | -1.88852100 |
| H | -7.10089700 | -4.87588500 | -1.98743600 |
| H | -7.93605800 | -2.57436500 | -1.51608300 |
| C | -3.59119600 | -0.94090800 | -0.72663000 |
| C | -3.84802300 | 0.52115700  | -1.00645800 |
| N | -2.31384300 | -1.25027600 | -1.21444700 |
| C | -1.23197800 | -1.50443200 | -1.58151900 |
| O | -2.99707400 | 1.27854000  | -1.45121000 |
| O | -5.07851500 | 0.92180500  | -0.66820400 |

|   |             |            |             |
|---|-------------|------------|-------------|
| C | -5.39653800 | 2.31353500 | -0.91166100 |
| H | -6.42531300 | 2.43071500 | -0.57584700 |
| H | -4.72689300 | 2.96024000 | -0.34307100 |
| H | -5.30974700 | 2.53514300 | -1.97704700 |
| C | -2.35067300 | 2.22106400 | 2.63754900  |
| H | -2.76622000 | 3.08017200 | 2.10337000  |
| H | -2.51732400 | 2.34720900 | 3.71100200  |
| H | -1.28019500 | 2.15861500 | 2.44804700  |

### TSb'

B3LYP/6-31+G(d,p)-CPCM(dichloromethane): E = -3705.335746 Hartrees; G = -3705.446079 Hartrees

M06-2X/6-311++G(d,p)-CPCM(dichloromethane): single-point energy = -3705.7095358 Hartrees

|   |             |             |             |
|---|-------------|-------------|-------------|
| C | 7.44455600  | -1.72233600 | 2.26592000  |
| C | 6.02769300  | -1.74697900 | 2.33040100  |
| C | 5.27135000  | -1.53493000 | 1.12413100  |
| C | 5.97915600  | -1.30613900 | -0.08220700 |
| C | 7.36469100  | -1.29096800 | -0.11036500 |
| C | 8.10964900  | -1.50319200 | 1.07978400  |
| C | 3.84044400  | -1.57828400 | 1.23562900  |
| C | 3.29315000  | -1.80939800 | 2.48179000  |
| C | 4.13342200  | -1.99738200 | 3.60522000  |
| N | 5.45084000  | -1.97361700 | 3.54802200  |
| C | 2.91960300  | -1.39070400 | 0.02197600  |
| C | 2.21774000  | -2.72666800 | -0.32389100 |
| N | 1.29686900  | -2.57971400 | -1.53129300 |
| C | 2.04288300  | -2.28847200 | -2.81352100 |
| C | 3.05379100  | -3.42956000 | -3.07276400 |
| C | 2.87583000  | -4.51828200 | -1.99640700 |
| C | 3.18917200  | -3.90212900 | -0.61911600 |
| C | 1.41190700  | -5.03487700 | -2.06107500 |
| C | 0.48148500  | -3.84672600 | -1.68764100 |
| C | 1.14904900  | -6.24070200 | -1.19458000 |
| C | 0.82090300  | -7.44773300 | -1.66581600 |
| O | 7.93883600  | -1.06055400 | -1.32716000 |
| C | 9.36614900  | -1.01973200 | -1.42808400 |
| N | 1.91342700  | -0.34940100 | 0.23774400  |
| C | 2.02784100  | 0.92671400  | -0.21564900 |
| S | 3.33616800  | 1.46806800  | -1.15495300 |
| N | 0.97473100  | 1.73469700  | 0.11568500  |
| C | 0.90277600  | 3.12810500  | -0.14787700 |
| C | -0.15171200 | 3.62791800  | -0.91207500 |
| C | -0.26358600 | 5.00709200  | -1.12448700 |
| C | 0.67120800  | 5.89151200  | -0.59208400 |

|   |             |             |             |
|---|-------------|-------------|-------------|
| C | 1.72313100  | 5.37708800  | 0.17470600  |
| C | 1.84121100  | 4.00820200  | 0.40603800  |
| C | -1.43325000 | 5.52026500  | -1.92128400 |
| F | -1.60984400 | 4.82491700  | -3.07594800 |
| C | 2.75902400  | 6.32038200  | 0.72708700  |
| F | 3.37594900  | 5.82820900  | 1.82848400  |
| F | -2.60409400 | 5.40937800  | -1.23166600 |
| F | -1.30500300 | 6.82418800  | -2.26029700 |
| F | 3.74211400  | 6.58336900  | -0.18039200 |
| F | 2.22897000  | 7.52151100  | 1.07118700  |
| H | 3.68745800  | -2.17741200 | 4.58125600  |
| H | 2.21778500  | -1.84710300 | 2.62228900  |
| H | 0.09625700  | 1.31222700  | 0.41769100  |
| H | 7.99620100  | -1.88335400 | 3.18663000  |
| H | 1.18084200  | -0.56875600 | 0.92141900  |
| H | 3.51636800  | -1.05426000 | -0.82348500 |
| H | -0.87653100 | 2.94327300  | -1.33622600 |
| H | 2.51282300  | -1.31003900 | -2.71201500 |
| H | 2.64605800  | 3.61939000  | 1.01664400  |
| H | 4.22372700  | -3.55006300 | -0.61914300 |
| H | 0.58203000  | 6.95715400  | -0.76223700 |
| H | 1.28255500  | -2.21326500 | -3.59252300 |
| H | 9.19248400  | -1.49112200 | 1.06757200  |
| H | 5.46092300  | -1.11394100 | -1.01337400 |
| H | 1.54227600  | -2.97646000 | 0.49774900  |
| H | 3.11260300  | -4.64847600 | 0.17479900  |
| H | 2.89187100  | -3.84976000 | -4.06929500 |
| H | 3.56199500  | -5.34672500 | -2.19007100 |
| H | -0.26317300 | -3.64654600 | -2.45919500 |
| H | -0.04740500 | -3.99681700 | -0.74503700 |
| H | 1.21406000  | -5.32081100 | -3.09989200 |
| H | 4.07662100  | -3.04351600 | -3.04470300 |
| H | 9.57901900  | -0.82213500 | -2.47852300 |
| H | 9.78429500  | -0.21490200 | -0.81400400 |
| H | 9.81153000  | -1.97806200 | -1.13987800 |
| H | 1.23545400  | -6.10004500 | -0.11677500 |
| H | 0.65059300  | -8.28836400 | -0.99965800 |
| H | 0.71197900  | -7.63397400 | -2.73220400 |
| C | -7.25107100 | -0.76638600 | 2.51603000  |
| C | -7.82469900 | -1.87261700 | 1.88174800  |
| C | -7.04452600 | -2.75047200 | 1.11654100  |
| C | -5.68508700 | -2.47638200 | 1.00918600  |
| C | -5.08649000 | -1.36319800 | 1.63329300  |
| C | -5.87869200 | -0.50470300 | 2.39349500  |

|   |             |             |             |
|---|-------------|-------------|-------------|
| N | -4.71247700 | -3.23192200 | 0.34019500  |
| C | -3.45808400 | -2.70649500 | 0.54111400  |
| C | -3.63081300 | -1.38747400 | 1.30883000  |
| O | -2.40692500 | -3.22616600 | 0.18015000  |
| C | -2.63807200 | -1.11723000 | 2.34185700  |
| C | -1.27123400 | -1.40196000 | 2.18170500  |
| N | -0.11432300 | -1.58623100 | 2.10390200  |
| C | -2.95243600 | -0.40137900 | 3.51646400  |
| N | -3.19084800 | 0.18513200  | 4.50389000  |
| H | -7.87038800 | -0.10162300 | 3.10971300  |
| H | -8.88897000 | -2.06196800 | 1.98487100  |
| H | -7.48810900 | -3.61431800 | 0.63365800  |
| H | -5.45078300 | 0.35805000  | 2.88668900  |
| H | 0.60894100  | -1.81506400 | -1.37051300 |
| C | -5.79732600 | 0.46383300  | -0.96993300 |
| C | -4.55561800 | -0.15701900 | -1.21150200 |
| C | -4.41758900 | -0.90691500 | -2.39749600 |
| C | -5.46944000 | -1.02292900 | -3.30741100 |
| C | -6.69163200 | -0.39321400 | -3.05973600 |
| C | -6.84505600 | 0.34761000  | -1.88539100 |
| H | -5.95033600 | 1.04086600  | -0.07075200 |
| H | -3.48096400 | -1.40335200 | -2.62117200 |
| H | -5.32606500 | -1.60489200 | -4.21314900 |
| H | -7.50957900 | -0.47856800 | -3.76878300 |
| H | -7.78794200 | 0.84294400  | -1.67232500 |
| C | -3.40264600 | -0.08047800 | -0.24117800 |
| C | -3.10747600 | 1.18108100  | 0.53665400  |
| N | -2.19548700 | -0.48663800 | -0.82905400 |
| C | -1.17572800 | -0.85288100 | -1.27238700 |
| O | -1.96938900 | 1.55212400  | 0.78688500  |
| O | -4.19233100 | 1.80058100  | 0.99984600  |
| C | -3.97154600 | 2.98036100  | 1.81517400  |
| H | -4.96795900 | 3.35658100  | 2.03952000  |
| H | -3.44633000 | 2.70397900  | 2.73118200  |
| H | -3.39519100 | 3.71813300  | 1.25571700  |
| C | -4.96615600 | -4.48575200 | -0.34915200 |
| H | -5.36715500 | -5.23235000 | 0.34403600  |
| H | -5.67847700 | -4.33327100 | -1.16517900 |
| H | -4.02063700 | -4.84344700 | -0.75577100 |
